# Supplementary material for: The state of Medusozoa genomics: current evidence and future challenges
Source: PubMed Central journal article supplement (PMC9112765; doi:10.1093/gigascience/giac036), 2022-05-17

|                                                                               |                                                                                                                                                                                                                                                                                                                                                                                                                                                                                                                                                                                                                                                                                                                                                                                                                                                                                                                                                                                                                                                                                                                                                                                                                                                                                                                                                                                                                               |                                      |
|-------------------------------------------------------------------------------|-------------------------------------------------------------------------------------------------------------------------------------------------------------------------------------------------------------------------------------------------------------------------------------------------------------------------------------------------------------------------------------------------------------------------------------------------------------------------------------------------------------------------------------------------------------------------------------------------------------------------------------------------------------------------------------------------------------------------------------------------------------------------------------------------------------------------------------------------------------------------------------------------------------------------------------------------------------------------------------------------------------------------------------------------------------------------------------------------------------------------------------------------------------------------------------------------------------------------------------------------------------------------------------------------------------------------------------------------------------------------------------------------------------------------------|--------------------------------------|
| <b>Manuscript Number:</b>                                                     | GIGA-D-21-00404                                                                                                                                                                                                                                                                                                                                                                                                                                                                                                                                                                                                                                                                                                                                                                                                                                                                                                                                                                                                                                                                                                                                                                                                                                                                                                                                                                                                               |                                      |
| <b>Full Title:</b>                                                            | The state of Medusozoa genomics: past evidence and future challenges                                                                                                                                                                                                                                                                                                                                                                                                                                                                                                                                                                                                                                                                                                                                                                                                                                                                                                                                                                                                                                                                                                                                                                                                                                                                                                                                                          |                                      |
| <b>Article Type:</b>                                                          | Review                                                                                                                                                                                                                                                                                                                                                                                                                                                                                                                                                                                                                                                                                                                                                                                                                                                                                                                                                                                                                                                                                                                                                                                                                                                                                                                                                                                                                        |                                      |
| <b>Funding Information:</b>                                                   | Coordenação de Aperfeiçoamento de Pessoal de Nível Superior (88882.377420/2019-01)                                                                                                                                                                                                                                                                                                                                                                                                                                                                                                                                                                                                                                                                                                                                                                                                                                                                                                                                                                                                                                                                                                                                                                                                                                                                                                                                            | Miss Mylena Daiana Santander         |
|                                                                               | Fundação de Amparo à Pesquisa do Estado de São Paulo (FAPESP 2016/04560-9)                                                                                                                                                                                                                                                                                                                                                                                                                                                                                                                                                                                                                                                                                                                                                                                                                                                                                                                                                                                                                                                                                                                                                                                                                                                                                                                                                    | Mr. Maximiliano Manuel Maronna       |
|                                                                               | Fundação de Amparo à Pesquisa do Estado de São Paulo (FAPESP 2015/20139-)                                                                                                                                                                                                                                                                                                                                                                                                                                                                                                                                                                                                                                                                                                                                                                                                                                                                                                                                                                                                                                                                                                                                                                                                                                                                                                                                                     | Miss Sônia Cristina da Silva Andrade |
| <b>Abstract:</b>                                                              | <p>Medusozoa is a widely distributed ancient lineage that harbors one-third of Cnidaria diversity divided into four classes. This clade is characterized by the succession of stages and modes of reproduction during metagenic lifecycles, and includes some of the most plastic body plans and life cycles among animals. The characterization of traditional genomic features, such as chromosome numbers and genome sizes, was rather overlooked in Medusozoa and many evolutionary questions still remain unanswered. Modern genomic DNA sequencing in this group started in 2010 with the publishing of the <i>Hydra vulgaris</i> genome has experienced an exponential increase in the past three years. Therefore, an update of the state of Medusozoa genomics is warranted. We reviewed different sources of evidence, including cytogenetic records and high-throughput sequencing (HTS) projects. We focused on four main topics that would be relevant for the broad Cnidaria research community: 1) taxonomic coverage of genomic information; 2) continuity, quality and completeness of HTS datasets; 3) overview of the Medusozoa specific research questions approached with genomics; and 4) the accessibility of data and metadata. We highlight a lack of standardization in genomic projects and their reports, and reinforce a series of recommendations to enhance future collaborative research.</p> |                                      |
| <b>Corresponding Author:</b>                                                  | Mylena Daiana Santander, Bachelor<br>Universidade de Sao Paulo Instituto de Biociencias<br>São Paulo, SP BRAZIL                                                                                                                                                                                                                                                                                                                                                                                                                                                                                                                                                                                                                                                                                                                                                                                                                                                                                                                                                                                                                                                                                                                                                                                                                                                                                                               |                                      |
| <b>Corresponding Author Secondary Information:</b>                            |                                                                                                                                                                                                                                                                                                                                                                                                                                                                                                                                                                                                                                                                                                                                                                                                                                                                                                                                                                                                                                                                                                                                                                                                                                                                                                                                                                                                                               |                                      |
| <b>Corresponding Author's Institution:</b>                                    | Universidade de Sao Paulo Instituto de Biociencias                                                                                                                                                                                                                                                                                                                                                                                                                                                                                                                                                                                                                                                                                                                                                                                                                                                                                                                                                                                                                                                                                                                                                                                                                                                                                                                                                                            |                                      |
| <b>Corresponding Author's Secondary Institution:</b>                          |                                                                                                                                                                                                                                                                                                                                                                                                                                                                                                                                                                                                                                                                                                                                                                                                                                                                                                                                                                                                                                                                                                                                                                                                                                                                                                                                                                                                                               |                                      |
| <b>First Author:</b>                                                          | Mylena Daiana Santander, Bachelor                                                                                                                                                                                                                                                                                                                                                                                                                                                                                                                                                                                                                                                                                                                                                                                                                                                                                                                                                                                                                                                                                                                                                                                                                                                                                                                                                                                             |                                      |
| <b>First Author Secondary Information:</b>                                    |                                                                                                                                                                                                                                                                                                                                                                                                                                                                                                                                                                                                                                                                                                                                                                                                                                                                                                                                                                                                                                                                                                                                                                                                                                                                                                                                                                                                                               |                                      |
| <b>Order of Authors:</b>                                                      | Mylena Daiana Santander, Bachelor                                                                                                                                                                                                                                                                                                                                                                                                                                                                                                                                                                                                                                                                                                                                                                                                                                                                                                                                                                                                                                                                                                                                                                                                                                                                                                                                                                                             |                                      |
|                                                                               | Maximiliano Manuel Maronna, PhD                                                                                                                                                                                                                                                                                                                                                                                                                                                                                                                                                                                                                                                                                                                                                                                                                                                                                                                                                                                                                                                                                                                                                                                                                                                                                                                                                                                               |                                      |
|                                                                               | Joseph F Ryan, PhD                                                                                                                                                                                                                                                                                                                                                                                                                                                                                                                                                                                                                                                                                                                                                                                                                                                                                                                                                                                                                                                                                                                                                                                                                                                                                                                                                                                                            |                                      |
|                                                                               | Sônia Cristina da Silva Andrade, PhD                                                                                                                                                                                                                                                                                                                                                                                                                                                                                                                                                                                                                                                                                                                                                                                                                                                                                                                                                                                                                                                                                                                                                                                                                                                                                                                                                                                          |                                      |
| <b>Order of Authors Secondary Information:</b>                                |                                                                                                                                                                                                                                                                                                                                                                                                                                                                                                                                                                                                                                                                                                                                                                                                                                                                                                                                                                                                                                                                                                                                                                                                                                                                                                                                                                                                                               |                                      |
| <b>Additional Information:</b>                                                |                                                                                                                                                                                                                                                                                                                                                                                                                                                                                                                                                                                                                                                                                                                                                                                                                                                                                                                                                                                                                                                                                                                                                                                                                                                                                                                                                                                                                               |                                      |
| <b>Question</b>                                                               | <b>Response</b>                                                                                                                                                                                                                                                                                                                                                                                                                                                                                                                                                                                                                                                                                                                                                                                                                                                                                                                                                                                                                                                                                                                                                                                                                                                                                                                                                                                                               |                                      |
| Are you submitting this manuscript to a special series or article collection? | No                                                                                                                                                                                                                                                                                                                                                                                                                                                                                                                                                                                                                                                                                                                                                                                                                                                                                                                                                                                                                                                                                                                                                                                                                                                                                                                                                                                                                            |                                      |

|                                                                                                                                                                                                                                                                                                                                                                                                                                                                                                                                                         |            |
|---------------------------------------------------------------------------------------------------------------------------------------------------------------------------------------------------------------------------------------------------------------------------------------------------------------------------------------------------------------------------------------------------------------------------------------------------------------------------------------------------------------------------------------------------------|------------|
| <p><b>Experimental design and statistics</b></p> <p>Full details of the experimental design and statistical methods used should be given in the Methods section, as detailed in our <a href="#">Minimum Standards Reporting Checklist</a>. Information essential to interpreting the data presented should be made available in the figure legends.</p> <p>Have you included all the information requested in your manuscript?</p>                                                                                                                      | <p>Yes</p> |
| <p><b>Resources</b></p> <p>A description of all resources used, including antibodies, cell lines, animals and software tools, with enough information to allow them to be uniquely identified, should be included in the Methods section. Authors are strongly encouraged to cite <a href="#">Research Resource Identifiers</a> (RRIDs) for antibodies, model organisms and tools, where possible.</p> <p>Have you included the information requested as detailed in our <a href="#">Minimum Standards Reporting Checklist</a>?</p>                     | <p>Yes</p> |
| <p><b>Availability of data and materials</b></p> <p>All datasets and code on which the conclusions of the paper rely must be either included in your submission or deposited in <a href="#">publicly available repositories</a> (where available and ethically appropriate), referencing such data using a unique identifier in the references and in the “Availability of Data and Materials” section of your manuscript.</p> <p>Have you have met the above requirement as detailed in our <a href="#">Minimum Standards Reporting Checklist</a>?</p> | <p>Yes</p> |

1 **The state of Medusozoa genomics: past evidence and future challenges**

2 Santander, Mylena D. 1 ORCID 0000-0001-6750-4180

3 Maronna, Maximiliano M. 2 ORCID 0000-0002-2590-639X

4 Ryan, Joseph F. 3,4 ORCID 0000-0001-5478-0522

5 Andrade, Sónia CS. 1 ORCID 0000-0002-1302-5261

6

7 **Affiliation**

8 1. Departamento de Genética e Biologia Evolutiva, Instituto de Biociências, Universidade  
9 São Paulo, 277 Rua do Matão, Cidade Universitária, São Paulo, Brazil. ZIP CODE  
10 05508-090.

11 2. Departamento de Zoologia, Instituto de Biociências, Universidade de São Paulo, São  
12 Paulo, 101 Rua do Matão Cidade Universitária, São Paulo, Brazil. ZIP CODE 05508-  
13 090.

14 3. Whitney Laboratory for Marine Bioscience, University of Florida, 9505 Ocean Shore  
15 Blvd, St. Augustine, Florida, 32080, USA

16 4. Department of Biology, University of Florida, 220 Bartram Hall, Gainesville, FL, 32611,  
17 USA

18 Corresponding authors: MDS [mylena.santander@gmail.com](mailto:mylena.santander@gmail.com), MMM  
19 [maxmaronna@gmail.com](mailto:maxmaronna@gmail.com)

20

21

22

23

24

25 **Abstract**

26 Medusozoa is a widely distributed ancient lineage that harbors one-third of Cnidaria diversity  
27 divided into four classes. This clade is characterized by the succession of stages and modes  
28 of reproduction during metagenic lifecycles, and includes some of the most plastic body plans  
29 and life cycles among animals. The characterization of traditional genomic features, such as  
30 chromosome numbers and genome sizes, was rather overlooked in Medusozoa and many  
31 evolutionary questions still remain unanswered. Modern genomic DNA sequencing in this  
32 group started in 2010 with the publishing of the *Hydra vulgaris* genome has experienced an  
33 exponential increase in the past three years. Therefore, an update of the state of Medusozoa  
34 genomics is warranted. We reviewed different sources of evidence, including cytogenetic  
35 records and high-throughput sequencing (HTS) projects. We focused on four main topics that  
36 would be relevant for the broad Cnidaria research community: 1) taxonomic coverage of  
37 genomic information; 2) continuity, quality and completeness of HTS datasets; 3) overview of  
38 the Medusozoa specific research questions approached with genomics; and 4) the  
39 accessibility of data and metadata. We highlight a lack of standardization in genomic projects  
40 and their reports, and reinforce a series of recommendations to enhance future collaborative  
41 research.

42

43 **Keywords**

44 Annotation, completeness, assembly, genome size, chromosome number, collaborative  
45 genomics

46

47

48

49

50

## 51 **Background**

52           Medusozoa subphylum includes nearly 4,055 species of invertebrates distributed in  
53 the classes Hydrozoa, Cubozoa, Staurozoa and Scyphozoa [1], which are found at all latitudes  
54 in almost all aquatic environments, from freshwater to marine, and from shallow to deep  
55 waters. Medusozoa species, together with the other cnidarians classes (i.e. Anthozoa and  
56 Endocnidozoa), harbor some of the most plastic life cycles and diverse body plans among  
57 animals [2], and represent one of its early diverging groups, with all major cnidarian lineages  
58 already present 500 million years ago [3].

59           The Medusozoa clade is characterized by different evolutionary novelties, such as the  
60 presence of linear mitochondria and the adult pelagic stage, also known as medusa or jellyfish  
61 [4–6]. Most medusozoan life-cycles are characterized by the succession of different stages,  
62 including a larval, benthic asexually reproducing polyp stage, and a sexually reproducing  
63 jellyfish stage [6,7]. This ancestral metagenic life-cycle pattern is highly plastic and in some  
64 groups has been extensively modified or even lost. For example, several lineages have lost  
65 the pelagic medusae or reduced it to a reproductive structure, or acquired colonial lifestyles  
66 during the benthic phase [8–10]. Other novel traits have emerged in Medusozoa such as  
67 complex body patterns, neuromuscular systems and sensory organs [11].

68           The history of Medusozoa genomics started with pioneer cytogenetics reports (e.g.,  
69 [12,13]) and was followed later by genome size estimations [14,15]. Over the past 20 years,  
70 technological advances and cost reduction of genome-scale sequencing platforms have led

71 to a steady increase in both number and diversity of sequenced genomes and transcriptomes  
72 [16,17]. Medusozoa is not an exception, as numerous genomic resources have become  
73 available for model and non-model species, especially in the last 3 years. This advance has  
74 enabled the study of the genetic basis of many Medusozoa novel traits (e.g. [18–22]. Previous  
75 reviews about cnidaria genomics have focused on the small number of species with  
76 sequenced genomes available at the time [11,23,24], on individual cnidarian lineages (i.e.  
77 Myxozoa; [25]), or on specific topics such as toxins or evolution of novel traits [11,26]. Given  
78 the increasing amount of genomic information available, an update of the state of Medusozoa  
79 genomics is warranted.

80 Here, we provide a comprehensive review of the major advances in Medusozoa  
81 genomics over the past century. In order to shed light in the understanding of the genomic  
82 evolution of the group from high throughput sequencing (HTS) datasets, we report the main  
83 trends on the number and quality of available genome projects, taking into account basic  
84 information of sequencing datasets, genome assemblies, genome annotations, and  
85 accessibility of associated data and metadata.

86

## 87 **Main text**

### 88 **1. Methods**

89 We surveyed literature and databases for cytogenetic reports and genome size  
90 estimations. Our main source was NCBI Genome (Assembly, Genomes, Nucleotide,  
91 Taxonomy and SRA; [27]). For the information not present in NCBI, published articles were  
92 checked for proper information collection, as well as personal repositories mentioned in the  
93 associated articles. Due to recent updates in taxonomic statuses, we modified the attribution  
94 of karyotypes, genome sizes and assemblies of several species (see main text and  
95 Supplementary Materials).

96           Because there have been subtle variations in metrics and statistics between most  
97 genome reports, we recalculated some statistics, allowing us to make meaningful  
98 comparisons. Briefly, we have generated the following: i) assembly statistics statswrapper.sh  
99 script from BBmap (v38.73; RRID:SCR\_016965; [28]); ii) gene statistics from the original  
100 annotation files with AGAT (v0.6.0; [29]) and assessment of completeness of all assemblies  
101 using BUSCO (v5.0.0+galaxy0; RRID:SCR\_015008; [30]) in genome mode and Metaeuk  
102 software, using two Single Orthologs Databases (eukaryota\_odb10, number of genes=255,  
103 number of species=70; metazoa\_odb10, number of genes=954, number of species=65),  
104 available at the public Galaxy server [31,32].

105           Assembly quality was reported following the metric proposed by Earth Biogenome  
106 Project [33] (hereafter BGP-metric). This system avoids the use of ambiguous terminology for  
107 quality and uses a logarithmic scale where the first two numbers are the exponents of the N50  
108 contig and scaffold (1: 0-99Kb; 2: 1-9.9Mb; 3: 10-99.9Mbp), and the third number corresponds  
109 to the level of chromosomal assembly (1: 90% DNA > assigned to chromosomes in silico; 2:  
110 chromosomal rearrangements validated by two data sources; 3: >80% DNA assigned to intra-  
111 species maps and experimental validation of all breakpoints; see [33]).

112           All graphs were generated using Python v.3 with ETE Toolkit v.3 [34], Matplotlib v3.3.1  
113 [35] and Seaborn v.0.11 [36]. The tree of figures 1 and 3 represent a simplified phylogenetic  
114 hypothesis obtained by combining phylogenies from previous studies (Scyphozoa [37],  
115 Medusozoa [5], Hydrozoa [38,39]), taking into account clades with high congruence and  
116 support values. Although the different phylogenetic hypotheses were mostly congruent, no  
117 single study nor molecular dataset comprised all the terminals discussed here. To compile all  
118 genomic information and HTS metadata referenced in this review, we created a report model,  
119 based on previous works and public databases such as NCBI (Supplementary file S1;  
120 [29,40,41]). All collected data was updated until May 1st 2021.

## 121           **2. Genomic projects: whos and hows of Medusozoa**

122 Chromosome numbers are known for 34 hydrozoan species and 5 scyphozoan,  
123 including 3 lineages of the *Aurelia aurita* sp. complex species ([12,13,21,42–50];  
124 Supplementary file S2). Older chromosome descriptions for 25 species do not include  
125 information about chromosome morphology and often lack photographic records or schematic  
126 representations [12,13,42–46].

127 Genome size, a fundamental feature in genome sequencing project, has been  
128 experimentally estimated by Flow Cytometry or Feulgen Densitometry techniques, for 24  
129 medusozoan species (Scyphozoa: 7 spp.; Cubozoa: 1 spp.; Hydrozoa: 16 spp.;  
130 Supplementary file S2). Genome sizes are highly variable ranging from 254 Megabases (Mbp)  
131 to 3,481.68 Mbp in *Sanderia malayensis* (Scyphozoa) and in *Agalma elegans* (Hydrozoa),  
132 respectively [15]. Moreover, an additional 12 genome size estimates are available when  
133 considering k-mer-based computational assessments, increasing the number of species with  
134 genome size information to 30, and including two cubozoans (913-2,673Mbp) and one  
135 staurozoan (230 Mbp) (Supplementary file S1; Supplementary file S2). These estimates are  
136 considered less accurate, especially for genomes with high heterozygosity, high repetitive  
137 content and large genome size [51]. In fact, kmer based and experimental estimations from  
138 the same species differed by 13-33%.

139 A total of 34 HTS projects were identified. Of these, 32 had sequencing reads  
140 accessible through the NCBI-SRA database but not all of them were associated with a genome  
141 assembly (Table 1; Supplementary file S1). The taxonomic coverage of the assemblies  
142 encompassed 7 of the 13 Medusozoa orders, and represented at least one species per class  
143 (Figure 1): 28 assemblies were accessible for 21 species, representing 0.5 % of Medusozoa  
144 (Figure 1; Table 1; Supplementary file S1). Of these 21 species, 12 were Scyphozoa, 4 were  
145 Hydrozoa, 4 were Cubozoa, and one was Staurozoa. Scyphozoa had the highest number of  
146 sequenced families (4 of 22), of which Pelagiidae contained the highest number of sequenced  
147 species so far (5 spp.), followed by Ulmaridae, Rhizostomatidae and Cassiopeiidae with 2 spp.  
148 each (Figure 1), all belonging to subclass Discomedusae (none from Coronamedusae). The



149 remaining assemblies represent three of the eight Cubozoa families and three of 135  
150 Hydrozoan families (Figure 1). In addition to the small fraction of family representation in the  
151 hydrozoan genomes, the underrepresentation of Leptothecata is particularly unfavorable as it  
152 harbors more than half of Medusozoa species (2,059 sp; [1]).

153 -----TABLE 1 SHOULD BE LOCATED HERE-----

154 Much of the assembly effort is biased towards a small number of species. For example,  
155 three species of Hydrozoa and Scyphozoa presented two assemblies each, of which *Hydra*  
156 *viridissima* and *Rhopilema esculentum* were sequenced twice independently, meanwhile  
157 *Chrysoaora quinquecirrha* presents two versions of the same assembly. Moreover, three  
158 assemblies were available for two different strains of *Hydra vulgaris* (former *Hydra*  
159 *magnipapillata*), one of them published as an update of the reference genome called Hydra  
160 2.0. In *Aurelia*, the genomes of three different lineages were sequenced and assembled: Baltic  
161 sea, Roscoff and *Aurelia* sp1. strains [19,20]. Based on a recent taxonomic update of this  
162 genus [52], locality and genetic information described in the original articles [19,20], we  
163 decided to refer to these genomic datasets as: Baltic sea strain = *Aurelia aurita*; Roscoff strain  
164 and *Aurelia* sp1. strains = *Aurelia coerulea*.

165 Most of the assemblies were deposited in NCBI Assembly database, one was only  
166 found in a journal-specific database (i.e. GigaDB [53]), one assembly was only in a personal  
167 repository (Google Drive) and one in the National Human Genome Research Institute site [54].  
168 Some assemblies were additionally deposited in Institute-centered repositories such as OIST  
169 Marine Genomics Unit [55], the Marine Invertebrate Models Database (MARIMBA, [56]). A  
170 significant portion of the publicly available assemblies (total of 8, ~30%) are not yet associated  
171 with a formal publication and belong to the IRIDIAN GENOMES project [57]. The most frequent  
172 sequencing technology was Illumina (26 assemblies, ~93%), but leaving aside unpublished  
173 ones, most works include a combination of different sequencing techniques, library sizes and

174 platforms (i.e Sanger, 454, Illumina, long reads, linked-reads and Hi-C sequencing;  
175 Supplementary file S1).

176 Almost all medusozoan genome assemblies were at draft contig or scaffold level, with  
177 one exception, *Rhopilema esculentum*, where chromosome-level scale assembly was  
178 reported [58]. The total length, contig and scaffold number, N50, and GC% varied across  
179 species and classes (Figure 2A; references in Supplementary file S3). The assembly  
180 continuity and quality was higher in Scyphozoa than in the other classes, as observed by the  
181 distribution of contig and scaffold N50 (Figure 2A) and the BGP-metric for assembly quality  
182 (Figure 2A). In general, they are fragmented (75%), and have contig N50 of less than 40 Kbp  
183 (Figure 2A; BGP-metric values of 0.0.0, 0.1.0 and 0.2.0). Staurozoa, Cubozoa and Scyphozoa  
184 assemblies have similar percentages of base composition, around 35% to 43% GC.  
185 Consistent with previous reports [59], Hydrozoa genomes have a higher dispersion of GC%,  
186 with the GC values of five assemblies below 35%.

187 In relation to gene content (Figure 2B), 17 genomes were annotated using at least one  
188 source of information (Supplementary file S1) and their total number of genes or total number  
189 of protein-coding genes were reported. Further description of coding information was variable  
190 among works and as more detailed information was considered, the number of genomes with  
191 reported information decreased. Annotation tracks and gene models were available for only  
192 11 of the 17 datasets. Recalculations of gene features together with the information recovered  
193 from original articles, allowed us to analyze the distribution of 5 different features in 15  
194 genomes of Scyphozoa, Hydrozoa and Cubozoa (Figure 2B; Box): Number of genes (n=15),  
195 Mean exons per cds (n=10), Mean gene length (n=11), Mean exon length (n=11), Mean intron  
196 length (n=12). For three species, *Cassiopea xamachana* (Scyphozoa; 31,459), *Alatina alata*  
197 (Cubozoa; 66,156) and *Calvadosia cruxmelitensis* (Staurozoa; 26,258), the available  
198 information was restricted to the number of predicted genes.

199           The determination of repetitive DNA has been an integral step before gene annotation  
200 in most genomic projects. Frequently, repeat diversity was not properly reported and the  
201 degree of detail also varied between articles: e.g. some published works only referred to the  
202 most abundant class of repetitive DNA, meanwhile others described only results at class or  
203 family level. Repetitive libraries —consensus sequences representing repeat families— were  
204 not properly saved in repositories with the exception of two independent articles, and  
205 RepeatMasker results were reported in 4 articles (one reporting only classified repeats). Total  
206 repetitive length of 12 species for which coding information was also available is presented in  
207 Figure 2B and discussed in Box.

208           The degree of completeness of these datasets also varied substantially, as estimated  
209 by BUSCO (metazoa\_odb10 and eukaryota\_odb10; Figure 3). While all Eukaryota genes were  
210 present in at least one assembly (Supplementary file S3, Supplementary file S4), the level of  
211 absence and fragmentation of Metazoa genes was higher (Figure 3. Supplementary file S3).  
212 Seven Metazoa genes were absent in all assemblies and 17 were absent in more than 20%  
213 of them (Figure 3, indicated in red). Some Metazoa BUSCO genes were absent in lineages  
214 with the higher number of assemblies, such as Scyphozoa and Hydrozoa (Figure 3. indicated  
215 in yellow rectangles; Supplementary file S3). This condition was suggested by [20], after  
216 detecting the absence of 14 genes in 5 species (version metazoa\_o9db), 3 of which coincided  
217 with the genes detected as absent here (Orthodb IDs: 460044at33208, 601886at33208,  
218 114954at33208), one of which (445034at33208) that has a patchy distribution in Medusozoa  
219 and 9 of which were removed in later versions of the database (Figure 3 in bold).

220           Moreover, 27 genes were simultaneously recovered as undetectable or fragmented in  
221 more than 80% of the assemblies (Supplementary file S3). Based on BUSCO completeness  
222 assessment with metazoa\_o10db, 13 assemblies present 90-95% of genes  
223 (fragmented+complete), while only one assembly includes over 90% of complete genes; the  
224 remaining 15 assemblies present between 57-87% of genes (complete+fragmented) or 16-

225 77% complete genes. While the Metazoa database might include genes that are absent,  
226 fragmented, or have non-conventional features in all medusozoa species, the utility of the  
227 Eukaryota database in the completeness assessment is limited by its low number of genes.  
228 Until more specific databases are developed, the combination of both BUSCO databases  
229 should be used taking into account their limitations.

### 230 **3. The state of Medusozoa genomics: inner and derived knowledge**

231 The first glimpse of the Medusozoa genomic organization was obtained by cytogenetic  
232 studies [12,13,21,42–50], but in contrast to other animals, the available information is still  
233 sparse. Many cytogenetic questions essential to the understanding of genome evolution are  
234 unanswered in Medusozoa, either at species or population scale, including the distribution of  
235 the chromosome number ( $2n$ ), fundamental number of chromosome arms (FN), genome size,  
236 ploidy level, heterochromatin content. These are questions that have gained renewed interest  
237 since the arrival of the genomic era.

238 Regarding the phylogenetic distribution of the chromosome number, no inferences can  
239 yet be made on the sparse available information, apart from the presence of some  
240 chromosome variation throughout Medusozoa. A special case was reported in *Hydra* where,  
241 according to recent descriptions, many species shared a  $2n=30$  karyotype with metacentric or  
242 submetacentric chromosomes ([50]; Supplementary file S2). This suggests that the  $2n=30$   
243 karyotype could be widely distributed in the genus and even in other Hydrozoa groups, since  
244 it was also described for one species of Hydrocorynidae, Hydractiniidae, Campanulariidae,  
245 Bougainvilliidae, and Clytiidae, and 3 Eirenidae (Supplementary file S2; references therein).  
246 Interestingly, in Anthozoa, a few sea anemones and several scleractinian corals have  
247 karyotypes between  $2n=28$  and  $2n=30$  [60–62]. Nevertheless, a higher sampling effort should  
248 be conducted in order to test the extent of this apparent karyotype stability.

249 Scyphozoa genomes tend to be restricted to smaller sizes (~250 to ~700 Mbp) than  
250 those of Hydrozoa, which encompass a larger range (~380 to ~3,500 Mbp) (Figure 1;  
251 Supplementary file S2, references therein), but due to the scarcity of estimations that  
252 represent around 1% of the subphylum, these ranges should be considered preliminary. The  
253 evolution of genome size is a long-standing question that is included in the so-called C-value  
254 Enigma [40]. The latter cover several widely discussed frameworks and hypotheses that try to  
255 explain the causes and consequences of genome size variation and that have found support  
256 in different organisms (reviewed in [63]. The molecular basis of these variations in Medusozoa  
257 have only been studied in detail for *Hydra* [64] and for *S. malayensis* [65]; their trends have  
258 been related to repetitive DNA and gene length respectively (Box). Meanwhile, the ecological  
259 and historical factors underlying genome size diversity and its extent in Medusozoa, are topics  
260 that remain to be elucidated.

261

#### **Box. Genome content**

**Gene content and length:** it is straightforward to imagine that the evolution of these two characteristics have potential impacts in macroevolution of organisms. The distribution of gene number in Medusozoa (Figure 2B) ranged from 17,219 in the Scyphozoan *Rhopilema esculentum* [58] to 66,156 in the Cubozoan *Alatina alata* [22], but most species of all classes have gene counts near the median (26,258), which is higher than the range ( $18,943 \pm 451.82$ ) described for animals [40]. The upper limit described in the highly fragmented *A. alata* genome deviates from the observed in *Morbakka virulenta* (24,278 genes), the only other sequenced Cubomedusae [66]. Species with varying genome sizes of Hydrozoa, Scyphozoa and *M. virulenta* (Cubozoa) had similar mean CDS lengths (1,414, 1,214, 1,387 base pairs), mean numbers of exons per gene (5, 6, 5.4), mean exon lengths (306, 293, 432

bp), but had different gene lengths (9,530, 7,855 and 21,444 bp respectively) due to the presence of longer introns in Hydrozoa and Cubozoa when compared to Scyphozoa (Hydrozoa: 1,600; Cubozoa: 3,705 vs. 1,146 bp in Scyphozoa). This is best exemplified in the genome of the scyphozoan *S. malayensis*, which has the smallest cnidarian genome reported to date [65], and has also the smallest introns of any sequenced medusozoan genome (Figure 2B. yellow arrowhead). Nevertheless, these ranges are rough estimates and sometimes heterogeneous, e.g. resulting from different filtering parameters, and their implications should be tested as new assemblies and annotations become available.

**Repetitive content:** repetitive DNA represents a significant part of eukaryotic genomes and is highly diverse, composed by different kinds of transposable elements (TEs), tandem repeats and multigene families (e.g. rRNA and tRNA). Many of these sequences, especially TEs and satellite DNA, were initially considered as an expendable sector of the genome, although their impact on genomic evolution has since been recognized (reviewed in [67]). For example, fusion between TEs and host genes have occurred multiple times in vertebrates and have contributed to the evolution of novel features [68]. Likewise, TEs and other repetitive DNA have been associated with genomic rearrangements and changes in DNA content (e.g. [64,67]). The *Hydra* genus, which has been more extensively studied from this point of view, has experienced a rapid genomic evolutionary rate and presents a 3-fold genome size increase resulting from the amplification of a single LINE family [64]. Moreover, *Hydra* genomes include an over-representation of transposase-related domains [69]. It is interesting to note that many of the Medusozoa species studied so far have relatively small genomes but unusually high proportions of repetitive DNA [20,65,66,70]. Nevertheless, the lack of standardization in the description of its diversity, and the discrepancy in the degree of detail in which these have been described, limits the potential to make inferences. Repetitive DNA is a complex study subject, limited by assembly continuity and annotation

effort, but restricting genomic studies to the “functional” part of the genome (sensu [71]) may lead us to a narrowed view of the Medusozoa genome evolution.

262 Modern Medusozoa genomics formally started with the sequencing and publication of  
263 *Hydra vulgaris* genome [72] that in cnidaria was only preceded by *Nematostella vectensis*  
264 [60,72]. *Hydra vulgaris* is one of the earliest models in biology, mainly used for the study of  
265 development, regeneration, and more recently, of aging (reviewed in [73,74]). The study of  
266 these two early genomes was fundamental for the reconstruction of a more complex ancient  
267 eumetazoan genome than first suggested by the comparison of vertebrates and insects  
268 [16,23,60,72]. Nevertheless, unlike most other medusozoan species, *Hydra* lives in  
269 freshwater, lacks a medusa and has a genome that has experienced a very rapid rate of  
270 evolution [21]. It therefore is not the ideal species for reconstructing historical nodes on the  
271 Medusozoa tree of life. As such, more recent medusozoa genomes have led to important  
272 updates in our understanding of Medusozoa-relevant research topics, including phylogenetic  
273 reconstructions, the genetic basis of the medusae, the evolution of symbiosis, toxin  
274 characterization, Homeobox gene evolution, to name a few examples (Table 1). Nevertheless,  
275 Medusozoa genomes include thousands of single-copy genes and repetitive elements;  
276 however, only a very limited number of them have been analyzed in detail.

277 The determination of lineage specific genes and increases and decreases of gene  
278 content is one of the recurrent questions found in Medusozoa genomic studies (e.g. [20,21],  
279 but see [75,76]), and it has been carried on using different methodologies and sets of species.  
280 It has been estimated the most elevated rates of loss in Cnidaria in the hydrozoan branch  
281 leading to *Clytia hemisphaerica* and *Hydra* [21,72], followed by slightly lower rates of gene  
282 loss in Scyphozoa and substantially lower rates in Anthozoa [19]. Gene families that have  
283 experienced expansion and contraction have been studied in relation to complex life cycle  
284 patterns [19,21], simplification of the body plan [69,72], the evolution of symbiosis [69], among

285 others (table 1). Expression patterns of identified taxonomically restricted medusozoan genes  
286 have been mainly studied in the context of life cycle stages (e.g. [20,21]).

287 On the other hand, synteny was also analyzed several times, including species of  
288 Hydrozoa, Cubozoa and Scyphozoa, and were carried on at different scales depending on  
289 assembly continuity (i.e. microsynteny and macrosynteny), and often comparing the focus  
290 species to species from sister clade Anthozoa [19–21,62,72]. High synteny conservation was  
291 found within Anthozoa (*N. vectensis* vs. *Scolanthus callimorphus* [60–62]) and within  
292 Hydrozoa (*H. vulgaris* vs. *C. hemispherica*; [21]). Meanwhile, conservation of synteny at a  
293 lesser degree was also observed between Anthozoa and Scyphozoa (*N. vectensis* vs. *R.*  
294 *esculentum*; *N. vectensis* vs. *Aurelia* strains; [19,20,62]) and only a few shared syntenic blocks  
295 between Hydrozoa and Anthozoa (*H. vulgaris* vs. *N. vectensis*; [21,62,72]), Hydrozoa and  
296 Scyphozoa (*H. vulgaris* vs. *Aurelia aurita*; [19]) and Scyphozoa and Cubozoa (*A. aurita* vs. *M.*  
297 *virulenta*; [20]). It is particularly interesting to note that *H. vulgaris*, *N. vectensis* and *S.*  
298 *callimorphus* present  $2n=30$ , but shared fewer syntenic blocks than either of the two  
299 anthozoans with *R. esculentum*, which has a different karyotype ( $2n=22$ ) [62] (non peer-  
300 reviewed). These results suggest that there is evidence for the conservation of an ancient  
301 genome architecture in Anthozoa and Scyphozoa, but less conservation in Hydrozoa and  
302 Cubozoa, coincident with a more rapid rate of genome reorganization in the last two classes  
303 [21,62].

#### 304 **4. Prospects on genomic data and general resources**

305 The increasing amount of genomic information available for diverse organisms has  
306 enabled statistical inferences of trends in eukaryotic genomic evolution. Examples of such  
307 studies are available at small and large phylogenetic scales and have enabled evolutionary  
308 analyses of the distribution of gene numbers, gene features (e.g. intron size), and repetitive  
309 content (e.g. [40]). Nevertheless, the power of eukaryotic genomic comparative analyses is



310 hindered by a lack of data and metadata standardization [40,77], which is especially evident  
311 in Medusozoa.

312 We analyzed hundreds of fields including genetic information and metadata (methods,  
313 metrics and registry codes; table Supplementary file S1), of which no dataset presents most  
314 of them, whatever the area or section (e.g., processing area, section trimming). This could be  
315 a future problem because reusing of previously published datasets is becoming routine, and  
316 tracking of information (BioProjects, Biosamples, methodologies, filtering parameters, etc.)  
317 would be misleading [77,78].

318 The submission of raw sequencing data and fundamental metadata to the NCBI-SRA  
319 or EMBL-ENA remains a vital step in ensuring the usability and transparency of genome data  
320 [79,80]. Also, project centric repositories serve to store assemblies and associated datasets,  
321 and enable comparative studies. Nevertheless, their use should not lead to the abandonment  
322 of general databases, because it can result in the loss of fundamental metadata associated  
323 with a genomic project and has the potential to aggravate the discovery and re-usability  
324 problem [81]. For example, the assembly with the highest continuity as estimated by the BGP-  
325 metric, corresponding to *R. esculentum* [58], is only found in a journal specific database and  
326 lacks an stable identifier (e.g. NCBI accession). Moreover, even a simple deposit in a public  
327 database would call our attention to potential issues such as contamination (e.g. see online  
328 SRA runs SRR13700068 and SRR13036460).

329 About lack of past data and current limitations, we should learn from decades-old  
330 references of cytogenetic studies: because some of them do not provide complete material  
331 and methods (e.g., pretreatment, references, designs and photographs; general metadata as  
332 locality, taxonomic identification) and their results therefore should be considered carefully in  
333 a comparative framework (e.g., [16,82,83]). For example, we identified at least three  
334 independent projects that adopted different criteria for gene model filtering, and other three  
335 articles with slightly different criteria for repeat library filtering (Supplementary file S1). As

336 additional proof of this idea, this review presents a reanalysis on genome completeness by  
337 BUSCO, that was reran to ensure that comparisons were made between identically run  
338 analyses and database versions, which were frequently unspecified in the associated articles.

339         There is a growing number of community-driven guidelines, standards, databases and  
340 resources based on the Findable, Accessible, Interoperable and Reusable principles (FAIR  
341 principles) for digital research outputs [81]. Furthermore, global initiatives of large-scale  
342 genome sequencing included in Earth Biogenome Project have adopted a set of standardized  
343 protocols for the different stages of the genome projects, such as specimen collection, DNA  
344 extraction, sequencing, assembly and annotation methods, and reporting, in order to generate  
345 datasets that could “be useful to the broadest possible scientific community” [33]. Standards  
346 should be also implemented by independent research groups publishing genomes. The main  
347 goal of standardization is to promote evaluation, discovery, and reuse of genomic information,  
348 providing long term benefits for science.

349         The following are suggestions to enhance genome projects and outcomes, and to  
350 promote open and collaborative research.

351 1. Deposit all data and metadata in public specialized databases (e.g., NCBI), at least once  
352 associated articles are accepted for publication. Detail most metadata as possible, including  
353 those not considered as priority for the aforementioned project.

354 2. When possible, use a single standardized genome report format, based on previous  
355 Medusozoa projects (e.g. Supplementary file S1 presented here). This will help to recognize  
356 and select proper metadata options for new ones and will enable comparisons between  
357 studies; Alternatively, use specialized tools that standardize reports for multiple samples and  
358 datasets (e.g. [41,84,85]).

359 3. Deposit output results that were fundamental in any of the steps (e.g. gene models,  
360 repetitive libraries and annotation tracks).

361 4. Inform as much as possible if a dataset was edited (e.g., decontamination; gene and  
362 repetitive sequence filtering criteria).

363 5. Use and clearly identify software, database versions and references in all instances (e.g.,  
364 RRID, BUSCO version and repetitive database version).

365 6. Deposit command lines and scripts used to handle data (from reads to full annotation).

366

## 367 **Conclusions**

368 The pace of genomic development in Medusozoa is far more rapid than more  
369 traditional disciplines such as cytogenetics, where gaps still remain. As the effect of  
370 chromosome structural variants in evolution is increasingly tested and recognized, it is  
371 expected that these disciplines will gain a revived interest as has been seen in other animal  
372 groups [86]. In spite of the great advances in Medusozoa genomics, we found a general lack  
373 of standardization in methodologies and genome reports across independent sequencing  
374 projects. Efforts to incorporate standards would benefit future studies and could promote the  
375 identification of hitherto undiscovered evolutionary patterns.

376 It is safe to anticipate that standardization will become increasingly easier as  
377 chromosome-level assemblies become more commonplace and as new integrated workflows  
378 of data reporting are developed (e.g. [87]). It will be possible to perform standardized  
379 annotation and analyses in order to identify patterns in medusozoa genome evolution.  
380 Conversations about how best to promote such efforts and best practices for medusozoan  
381 genome efforts will help move the field forward. There are several potential platforms for  
382 gathering community input (e.g., Cnidofest [88], “coelenterate” biology [89], Tutzing workshop  
383 [90]). Such conversations could lead to new standards and potentially a powerful cnidarian  
384 genomics database. This latter goal would be most effective if accompanied by a strong  
385 alliance that spans the growing cnidarian genomics community.

386 **Data availability**

387 All collected information and outputs supporting new results are made available through the  
388 supplementary files S1-S9 and in figshare [91] (public release if accepted). All genomic  
389 resources from previous articles and projects are publicly available and their sources are  
390 referenced in Supplementary file S3 Table S3.

391 **Competing interests**

392 The authors declare that they have no competing interests

393 **Author's contributions**

394 MDS collected the information, ran the analysis, conceived the study and drafted the  
395 manuscript; MMM collected the information, conceived the study, drafted and reviewed the  
396 manuscript; JR drafted and reviewed the manuscript. SCSA conceived the study, drafted and  
397 reviewed the manuscript. All authors gave final approval for publication.

398 **Funding**

399 This work was supported by Coordenação de Aperfeiçoamento de Pessoal de Nível Superior  
400 88882.377420/2019-01 to MDS, Fundação de Amparo à Pesquisa do Estado de São Paulo  
401 FAPESP 2016/04560-9 to MMM, FAPESP 2015/20139-9 to SCSA.

402 **Acknowledgments**

403 We thank Analia Jaque for the jellyfish drawings of Figure 1 and Juan Martin Ferro for valuable  
404 comments on this review.

405 **References**

- 406 1. World Register of Marine Species. Cnidaria.  
407 <http://www.marinespecies.org/aphia.php?p=taxdetails&id=126>. Accessed 24 Nov 2021.
- 408 2. Bosch TCG, Adamska M, Augustin R, Domazet-Loso T, Foret S, Fraune S, et al.. How do  
409 environmental factors influence life cycles and development? An experimental framework for  
410 early-diverging metazoans. *BioEssays*. 2014; doi: 10.1002/bies.201400065.

- 411 3. Cartwright P, Collins AG. Fossils and phylogenies: integrating multiple lines of evidence to  
412 investigate the origin of early major metazoan lineages. *Integr Comp Biol.* 2007; doi:  
413 10/bzhzc2.
- 414 4. Bridge D, Cunningham CW, Schierwater B, DeSalle R, Buss LW. Class-level relationships  
415 in the phylum Cnidaria: evidence from mitochondrial genome structure. *Proc Natl Acad Sci U*  
416 *S A.* 1992; doi: 10/dxgw77.
- 417 5. Kayal E, Bentlage B, Sabrina Pankey M, Ohdera AH, Medina M, Plachetzki DC, et al..  
418 Phylogenomics provides a robust topology of the major cnidarian lineages and insights on  
419 the origins of key organismal traits. *BMC Evol Biol.* 2018; doi: 10.1186/s12862-018-1142-0.
- 420 6. Marques AC, Collins AG. Cladistic analysis of Medusozoa and cnidarian evolution.  
421 *Invertebr Biol.* 2004; doi: 10.1111/j.1744-7410.2004.tb00139.x.
- 422 7. Collins AG. Phylogeny of Medusozoa and the evolution of cnidarian life cycles. *J Evol*  
423 *Biol.* 2002; doi: 10.1046/j.1420-9101.2002.00403.x.
- 424 8. Boero F, Boero F Bouillon, J. Zoogeography and life cycle patterns of Mediterranean  
425 hydromedusae (Cnidaria). *Biol J Linn Soc.* 1993; doi: 10/cgvp43.
- 426 9. Da Silveira FL, Morandini AC. *Nausithoe aurea* n. sp.(Scyphozoa: Coronatae:  
427 Nausithoidae), a species with two pathways of reproduction after strobilation: sexual and  
428 asexual. *Contrib Zool.* 1997;66:235–46.
- 429 10. Straehler-Pohl I, Jarms G. Morphology and life cycle of *Carybdea morandinii*, sp.  
430 nov.(Cnidaria), a cubozoan with zooxanthellae and peculiar polyp anatomy. *Zootaxa.*  
431 2011;2755:36–56.
- 432 11. Forêt S, Knack B, Houliston E, Momose T, Manuel M, Quéinnec E, et al.. New tricks with  
433 old genes: the genetic bases of novel cnidarian traits. *Trends Genet.* 2010; doi: 10/dd74gw.
- 434 12. Harvey EB. A review of the chromosome numbers in the Metazoa. Part I. *J Morphol.*  
435 1916; doi: 10.1002/jmor.1050280102.

- 436 13. Makino S. An atlas of the chromosome numbers in animals. 2nd ed. Ames: The Iowa  
437 State College Press; 1951.
- 438 14. Goldberg RB, Crain WR, Ruderman JV, Moore GP, Buckley TR, Higgins RC, et al.. DNA  
439 sequence organization in the genomes of five marine invertebrates. *Chromosoma*. 1975; doi:  
440 10.1007/BF00284817.
- 441 15. Adachi K, Miyake H, Kuramochi T, Mizusawa K, Okumura S. Genome size distribution in  
442 phylum Cnidaria. *Fish Sci*. 2017; doi: 10/ggbqnf.
- 443 16. Dunn CW, Ryan JF. The evolution of animal genomes. *Curr Opin Genet Dev*. 2015; doi:  
444 10/gfkjbf.
- 445 17. Goodwin S, McPherson JD, McCombie WR. Coming of age: ten years of next-generation  
446 sequencing technologies. *Nat Rev Genet*. 2016; doi: 10.1038/nrg.2016.49.
- 447 18. Lewis Ames C, Ryan JF, Bely AE, Cartwright P, Collins AG. A new transcriptome and  
448 transcriptome profiling of adult and larval tissue in the box jellyfish *Alatina alata*: an emerging  
449 model for studying venom, vision and sex. *BMC Genomics*. 2016; doi: 10.1186/s12864-016-  
450 2944-3.
- 451 19. Gold DA, Katsuki T, Li Y, Yan X, Regulski M, Ibberson D, et al.. The genome of the  
452 jellyfish *Aurelia* and the evolution of animal complexity. *Nat Ecol Evol*. 2019; doi: 10/gfkwp4.
- 453 20. Khalturin K, Shinzato C, Khalturina M, Hamada M, Fujie M, Koyanagi R, et al..  
454 Medusozoan genomes inform the evolution of the jellyfish body plan. *Nat Ecol Evol*. 2019;  
455 doi: 10/gfzg9m.
- 456 21. Leclère L, Horin C, Chevalier S, Lapébie P, Dru P, Peron S, et al.. The genome of the  
457 jellyfish *Clytia hemisphaerica* and the evolution of the cnidarian life-cycle. *Nat Ecol Evol*.  
458 2019; doi: 10/gfwr3v.
- 459 22. Ohdera A, Ames CL, Dikow RB, Kayal E, Chiodin M, Busby B, et al.. Box, stalked, and  
460 upside-down? Draft genomes from diverse jellyfish (Cnidaria, Acraspeda) lineages: *Alatina*

461 *alata* (Cubozoa), *Calvadosia cruxmelitensis* (Staurozoa), and *Cassiopea xamachana*  
462 (Scyphozoa). *GigaScience*. 2019; doi: 10.1093/gigascience/giz069.

463 23. Steele RE, David CN, Technau U. A genomic view of 500 million years of cnidarian  
464 evolution. *Trends Genet TIG*. 2011; doi: 10/b53t8x.

465 24. Technau U, Schwaiger M. Recent advances in genomics and transcriptomics of  
466 cnidarians. *Mar Genomics*. 2015; doi: 10.1016/j.margen.2015.09.007.

467 25. Alama-Bermejo G, Holzer AS. Advances and Discoveries in Myxozoan Genomics.  
468 *Trends Parasitol*. 2021; doi: 10.1016/j.pt.2021.01.010.

469 26. D'Ambra I, Lauritano C. A Review of Toxins from Cnidaria. *Mar Drugs*. 2020;18:507.

470 27. NCBI Resource Coordinators N. Database resources of the National Center for  
471 Biotechnology Information. *Nucleic Acids Res*. 2015; doi: 10.1093/nar/gku1130.

472 28. Bushnell B. BBMap v38.73. <https://sourceforge.net/projects/bbmap/>. Accessed 25 May  
473 2021.

474 29. Dainat J, Hereñú D, Pucholt P. NBISweden/AGAT: AGAT-v0.6.0. *Zenodo*. 2021; doi:  
475 10.5281/zenodo.4637977.

476 30. Simão FA, Waterhouse RM, Ioannidis P, Kriventseva EV, Zdobnov EM. BUSCO:  
477 assessing genome assembly and annotation completeness with single-copy orthologs.  
478 *Bioinformatics*. 2015; doi: 10.1093/bioinformatics/btv351.

479 31. Afgan E, Baker D, Batut B, van den Beek M, Bouvier D, Čech M, et al.. The Galaxy  
480 platform for accessible, reproducible and collaborative biomedical analyses: 2018 update.  
481 *Nucleic Acids Res*. 2018; doi: 10.1093/nar/gky379.

482 32. Galaxy. <https://usegalaxy.org/>. Accessed 10 Aug 2021.

483 33. Lewin HA, Robinson GE, Kress WJ, Baker WJ, Coddington J, Crandall KA, et al.. Earth  
484 BioGenome Project: Sequencing life for the future of life. *Proc Natl Acad Sci*. 2018; doi:

485 10/gdh5vz.

486 34. Huerta-Cepas J, Serra F, Bork P. ETE 3: Reconstruction, analysis and visualization of  
487 phylogenomic data. *Mol Biol Evol.* 2016; doi: 10/gfzpph.

488 35. Caswell TA, Droettboom M, Lee A, Hunter J, Firing E, Andrade ES de, et al.. Matplotlib  
489 release v3.3.1. *Zenodo.* 2020; doi: 10.5281/zenodo.3984190.

490 36. Waskom ML. Seaborn: statistical data visualization. *J Open Source Softw.* 2021;6:3021.

491 37. Bayha KM, Dawson MN, Collins AG, Barbeitos MS, Haddock SHDD. Evolutionary  
492 relationships among scyphozoan jellyfish families based on complete taxon sampling and  
493 phylogenetic analyses of 18S and 28S ribosomal DNA. *Integr Comp Biol.* 2010; doi:  
494 10.1093/icb/icq074.

495 38. Maronna MM, Miranda TP, Peña Cantero ÁL, Barbeitos MS, Marques AC. Towards a  
496 phylogenetic classification of Leptothecata (Cnidaria, Hydrozoa). *Sci Rep.* 2016; doi:  
497 10/ggbrh4.

498 39. Mendoza- Becerril MA, Jaimes- Becerra AJ, Collins AG, Marques AC. Phylogeny and  
499 morphological evolution of the so- called bougainvilliids (Hydrozoa, Hydroidolina). *Zool Scr.*  
500 2018; doi: 10/gd4ftz.

501 40. Elliott TA, Gregory TR. What's in a genome? The C-value enigma and the evolution of  
502 eukaryotic genome content. *Phil Trans R Soc B.* 2015; doi: 10/gfkjbq.

503 41. Wilbrandt J, Misof B, Niehuis O. COGNATE: comparative gene annotation characterizer.  
504 *BMC Genomics.* 2017; doi: 10/ggbrjp.

505 42. Tardent P. Coelenterata, Cnidaria. 1st ed. Jena/Stuttgart: Gustav Fischer; 1978.

506 43. Kubota S. Systematic study on a bivalve-inhabiting hydroid *Eucheilota intermedia* Kubota  
507 from central Japan. *J Fac Sci Hokkaido Univ Ser VI Zool.* 1985;24:122-143.

508 44. Kubota S. Taxonomic Study on *Hydrocoryne miurensis* (Hydrozoa). *Publ SETO Mar Biol*



- 509 *Lab.* 1988;33:1–18.
- 510 45. Kubota S. Second finding of *Stylactaria piscicola* (Komai, 1932) comb. nov. (Hydrozoa:  
511 Hydractiniidae) from off Atsumi Peninsula, Japan. *Publ Seto Mar Biol Lab.* 1991;35:11–5.
- 512 46. Kubota S. Chromosome number of a bivalve-inhabiting hydroid, *Eugymnanthea japonica*  
513 (Leptomedusae: Eirenidae) from Japan. *Publ SETO Mar Biol Lab.* 1992;35:383–6.
- 514 47. Ping Guo. The karyotype of *Rhopilema esculenta*. *J Fish China.* 1994;18:253–5.
- 515 48. Anokhin B, Kuznetsova V. Chromosome morphology and banding patterns in *Hydra*  
516 *oligactis* Pallas and *H. circumcincta* Schultze (Hydroidea, Hydrida). *Folia Biol (Krakow).*  
517 1999;47:91–6.
- 518 49. Anokhin B, Nokkala S. Characterization of C-heterochromatin in four species of  
519 Hydrozoa (Cnidaria) by sequence specific fluorochromes Chromomycin A<sub>3</sub> and DAPI.  
520 *Caryologia.* 2004; doi: 10.1080/00087114.2004.10589387.
- 521 50. Anokhin BA, Kuznetsova VG. FISH-based karyotyping of *Pelmatohydra oligactis* (Pallas,  
522 1766), *Hydra oxycnida* Schulze, 1914, and *H. magnipapillata* Itô, 1947 (Cnidaria, Hydrozoa).  
523 *Comp Cytogenet.* 2018; doi: 10/gfst43.
- 524 51. Pflug JM, Holmes VR, Burrus C, Johnston JS, Maddison DR. Measuring Genome Sizes  
525 Using Read-Depth, k-mers, and Flow Cytometry: Methodological Comparisons in Beetles  
526 (Coleoptera). *G3 (Bethesda).* 2020; doi: 10.1534/g3.120.401028.
- 527 52. Lawley JW, Gamero-Mora E, Maronna MM, Chiaverano LM, Stampar SN, Hopcroft RR,  
528 et al.. The importance of molecular characters when morphological variability hinders  
529 diagnosability: systematics of the moon jellyfish genus *Aurelia* (Cnidaria: Scyphozoa). *PeerJ.*  
530 2021; doi: 10.7717/peerj.11954.
- 531 53. GigaDB. <http://gigadb.org>. Accessed 1 Apr 2021.
- 532 54. Hydra 2.0 Web Portal. <https://research.nhgri.nih.gov/hydra/>. Accessed 1 Apr 2021.

533 55. OIST Marine Genomics Unit Genome Browser. <https://marinegenomics.oist.jp/gallery>.  
534 Accessed 1 Apr 2021.

535 56. MARIMBA. <http://marimba.obs-vlfr.fr/>. Accessed 1 Apr 2021.

536 57. IRIDIAN GENOMES. <https://www.iriangiogenomes.com/>. Accessed 1 Apr 2021.

537 58. Li Y, Gao L, Pan Y, Tian M, Li Y, He C, et al.. Chromosome-level reference genome of  
538 the jellyfish *Rhopilema esculentum*. *GigaScience*. 2020; doi: 10.1093/gigascience/giaa036.

539 59. Galliot B, Schummer M. 'Guessmer' screening strategy applied to species with AT-rich  
540 coding sequences. *Trends Genet*. 1993; doi: 10.1016/0168-9525(93)90051-I.

541 60. Putnam NH, Srivastava M, Hellsten U, Dirks B, Chapman J, Salamov A, et al.. Sea  
542 anemone genome reveals ancestral eumetazoan gene repertoire and genomic organization.  
543 *Science*. 2007; doi: 10.1126/science.1139158.

544 61. Taguchi T, Tagami E, Mezaki T, Sekida S, Chou Y, Soong K, et al.. Recent progress of  
545 molecular cytogenetic study on scleractinian (stony) corals. *Kuroshio Sci*. 2017;11:73-81.

546 62. Technau U, Robb S, Genikhovich G, Montenegro J, Fropf W, Weinguny L, et al.. Sea  
547 anemone genomes reveal ancestral metazoan chromosomal macrosynteny. *Preprint*. 2021;  
548 doi: 10.21203/rs.3.rs-796229/v1.

549 63. Blommaert J. Genome size evolution: towards new model systems for old questions.  
550 *Proc R Soc B Biol Sci*. 2020; doi: 10.1098/rspb.2020.1441.

551 64. Wong WY, Simakov O, Bridge DM, Cartwright P, Bellantuono AJ, Kuhn A, et al..  
552 Expansion of a single transposable element family is associated with genome-size increase  
553 and radiation in the genus *Hydra*. *Proc Natl Acad Sci*. 2019; doi: 10/ggdjfb.

554 65. Nong W, Cao J, Li Y, Qu Z, Sun J, Swale T, et al.. Jellyfish genomes reveal distinct  
555 homeobox gene clusters and conservation of small RNA processing. *Nat Commun*. 2020;  
556 doi: 10.1038/s41467-020-16801-9.

557 66. Kim H-M, Weber JA, Lee N, Park SG, Cho YS, Bhak Y, et al.. The genome of the giant  
558 Nomura's jellyfish sheds light on the early evolution of active predation. *BMC Biol.* 2019; doi:  
559 10/gfxm7p.

560 67. Schrader L, Schmitz J. The impact of transposable elements in adaptive evolution. *Mol*  
561 *Ecol.* 2019; doi: 10.1111/mec.14794.

562 68. Cosby RL, Judd J, Zhang R, Zhong A, Garry N, Pritham EJ, et al.. Recurrent evolution of  
563 vertebrate transcription factors by transposase capture. *Science.* 2021; doi:  
564 10.1126/science.abc6405.

565 69. Hamada M, Satoh N, Khalturin K. A Reference Genome from the Symbiotic Hydrozoan,  
566 *Hydra viridissima*. *G3 (Bethesda).* 2020; doi: 10.1534/g3.120.401411.

567 70. Xia W, Li H, Cheng W, Li H, Mi Y, Gou X, et al.. High-Quality Genome Assembly of  
568 *Chrysaora quinquecirrha* Provides Insights Into the Adaptive Evolution of Jellyfish. *Front*  
569 *Genet.* 2020; doi: 10.3389/fgene.2020.00535.

570 71. Graur D, Zheng Y, Azevedo RBR. An Evolutionary Classification of Genomic Function.  
571 *Genome Biol Evol.* 2015; doi: 10.1093/gbe/evv021.

572 72. Chapman J a, Kirkness EF, Simakov O, Hampson SE, Mitros T, Weinmaier T, et al.. The  
573 dynamic genome of *Hydra*. *Nature.* 2010; doi: 10.1038/nature08830.

574 73. Galliot B. Hydra, a fruitful model system for 270 years. *Int J Dev Biol.* 2012; doi:  
575 10.1387/ijdb.120086bg.

576 74. Tomczyk S, Fischer K, Austad S, Galliot B. *Hydra*, a powerful model for aging studies.  
577 *Invertebr Reprod Dev.* 2015; doi: 10.1080/07924259.2014.927805.

578 75. Martín-Durán JM, Ryan JF, Vellutini BC, Pang K, Hejnol A. Increased taxon sampling  
579 reveals thousands of hidden orthologs in flatworms. *Genome Res.* 2017; doi: 10/f97kth.

580 76. Weisman CM, Murray AW, Eddy SR. Many, but not all, lineage-specific genes can be  
581 explained by homology detection failure. *PLOS Biol.* 2020; doi:  
582 10.1371/journal.pbio.3000862.

583 77. Schriml LM, Chuvochina M, Davies N, Eloë-Fadrosch EA, Finn RD, Hugenholtz P, et al..  
584 COVID-19 pandemic reveals the peril of ignoring metadata standards. *Sci Data.* 2020; doi:

585 10.1038/s41597-020-0524-5.

586 78. Toczydlowski RH, Liggins L, Gaither MR, Anderson TJ, Barton RL, Berg JT, et al.. Poor  
587 data stewardship will hinder global genetic diversity surveillance. *Proc Natl Acad Sci*.  
588 National Academy of Sciences; 2021; doi: 10.1073/pnas.2107934118.

589 79. Arita M, Karsch-Mizrachi I, Cochrane G, on behalf of the International Nucleotide  
590 Sequence Database Collaboration. The international nucleotide sequence database  
591 collaboration. *Nucleic Acids Res*. 2021; doi: 10.1093/nar/gkaa967.

592 80. Kodama Y, Shumway M, Leinonen R. The Sequence Read Archive: explosive growth of  
593 sequencing data. *Nucleic Acids Res*. 2012; doi: 10/fw3c92.

594 81. Wilkinson MD, Dumontier M, Aalbersberg IJ, Appleton G, Axton M, Baak A, et al.. The  
595 FAIR Guiding Principles for scientific data management and stewardship. *Sci Data*. Nature  
596 Publishing Group; 2016; doi: 10.1038/sdata.2016.18.

597 82. Schnitzler CE. What makes a jellyfish. *Nat Ecol Evol*. 2019; doi: 10/gfzg9d.

598 83. Smith SD, Pennell MW, Dunn CW, Edwards SV. Phylogenetics is the New Genetics (for  
599 Most of Biodiversity). *Trends Ecol Evol*. 2020; doi: 10.1016/j.tree.2020.01.005.

600 84. Ewels P, Magnusson M, Lundin S, Källér M. MultiQC: summarize analysis results for  
601 multiple tools and samples in a single report. *Bioinformatics*. 2016; doi:  
602 10.1093/bioinformatics/btw354.

603 85. Challis R, Richards E, Rajan J, Cochrane G, Blaxter M. BlobToolKit – Interactive Quality  
604 Assessment of Genome Assemblies. *G3 (Bethesda)*. 2020; doi: 10.1534/g3.119.400908.

605 86. Deakin JE, Potter S, O'Neill R, Ruiz-Herrera A, Cioffi MB, Eldridge MD, et al..  
606 Chromosomics: Bridging the gap between genomes and chromosomes. *Genes*.  
607 Multidisciplinary Digital Publishing Institute; 2019;10:627.

608 87. Dimitrova M, Meyer R, Buttigieg PL, Georgiev T, Zhelezov G, Demirov S, et al.. A  
609 streamlined workflow for conversion, peer review, and publication of genomics metadata as  
610 omics data papers. *GigaScience*. 2021; doi: 10.1093/gigascience/giab034.

611 88. He S, Grasis JA, Nicotra ML, Juliano CE, Schnitzler CE. Cnidofest 2018: the future is  
612 bright for cnidarian research. *Evodevo*. 2019; doi: 10.1186/s13227-019-0134-5.

- 613 89. Fautin DG, Westfall JA, Cartwright P, Daly M, Wyttenbach CR. Coelenterate Biology  
614 2003: Trends in Research on Cnidaria and Ctenophora. *Hydrobiologia*. 2005;530:11–3.
- 615 90. Juliano CE, Hobmayer B. Meeting report on “animal evolution: New perspectives from  
616 early emerging metazoans”, tutzing, september 14–17, 2015. *BioEssays*. 2016; doi:  
617 10.1002/bies.201500200.
- 618 91. Santander MD, Maronna MM, Ryan JF, Andrade SCS. The state of Medusozoa  
619 Genomics: supplementary material. doi: 10.6084/m9.figshare.17155676. Private link  
620 <https://figshare.com/s/cd5e8069fb33cdb5a7aa>
- 621 92. Hydractinia Genome Project Portal. <https://research.nhgri.nih.gov/hydractinia/>. Accessed  
622 1 Apr 2021.
- 623 93. Vogg MC, Beccari L, Iglesias Ollé L, Rampon C, Vriz S, Perruchoud C, et al.. An  
624 evolutionarily-conserved Wnt3/ $\beta$ -catenin/Sp5 feedback loop restricts head organizer activity  
625 in Hydra. *Nat Commun*. Nature Publishing Group; 2019; doi: 10.1038/s41467-018-08242-2.
- 626 94. Xia W-X, Li H-R, Ge J-H, Liu Y-W, Li H-H, Su Y-H, et al.. High-continuity genome  
627 assembly of the jellyfish *Chrysaora quinquecirrha*. *Zool Res*. 2021; doi:  
628 10.24272/j.issn.2095-8137.2020.258.

629

630 **Table 1 - Genomic projects related to Medusozoa HTS.** Sequencing projects with no  
631 current related publication are remarked with capital letters. Column "Main research topics"  
632 describes keywords according to references, restricted to a maximum of 4; "gene evolution"  
633 refers to the study of gene gains/losses and also of specific gene families. Species with  
634 reported assemblies were re-analyzed in this review (bold; Supplementary file S3 Table S3).  
635 UMCG=University Medical Center Groningen; IISER PRune=Indian Institute of Science  
636 Education and Research, Pune; NHGRI=The National Human Genome Research Institute;  
637 TF=transcription factors; \*"preliminary" assembly available at the institutional site; \*\*species  
638 with taxonomic updates. For further details see Supplementary file S1.

639

| Project               | Release year (NCBI-SRA) | Class (n° genomes) | Species                                             | Main research topics                                          |
|-----------------------|-------------------------|--------------------|-----------------------------------------------------|---------------------------------------------------------------|
| Chapman et al. [72]   | 2008                    | Hydrozoa (1)       | <i>Hydra vulgaris</i>                               | Gene evolution; micro-synteny                                 |
| IISER Pune            | 2014-2015               | Hydrozoa (1)       | <i>Hydra vulgaris</i>                               | not_informed                                                  |
| NHGRI [54]            | no SRA                  | Hydrozoa (1)       | <i>Hydra vulgaris</i>                               | not_informed                                                  |
| NHGRI [92]            | 2016                    | Hydrozoa (1)       | <i>Hydractinia echinata*</i>                        | not_informed                                                  |
| Gold et al. [19]      | 2018                    | Scyphozoa (1)      | <i>Aurelia coerulea</i>                             | Life cycle; gene evolution; intraspecies variability; HOX     |
| IRIDIAN GENOMES [57]  | 2018                    | Hydrozoa (1)       | <i>Craspedacusta sowerbii</i>                       | not_informed                                                  |
| Kim et al. [66]       | 2018                    | Scyphozoa (1)      | <i>Nemopilema nomurai</i>                           | Life cycle; jellyfish body patterning; gene evolution; toxins |
| IRIDIAN GENOMES [57]  | 2019                    | Hydrozoa (1)       | <i>Scolionema suvaense</i>                          | not_informed                                                  |
| Khalturin et al. [20] | 2019                    | Scyphozoa (2)      | <i>Aurelia aurita**</i> , <i>Aurelia coerulea**</i> | Life cycle; jellyfish body plan; gene evolution; synteny      |
|                       |                         | Cubozoa (1)        | <i>Morbakka virulenta</i>                           |                                                               |
| Leclère et al. [21]   | 2019                    | Hydrozoa (1)       | <i>Clytia hemisphaerica</i>                         | Life cycle; gene evolution; micro-synteny; TF                 |
| Odhera et al. [22]    | 2019                    | Scyphozoa (1)      | <i>Cassiopea xamachana</i>                          | Gene evolution; micro-synteny; Homeobox; toxins               |
|                       |                         | Cubozoa (1)        | <i>Alatina alata</i>                                |                                                               |
|                       |                         | Staurozoa (1)      | <i>Calvadosia cruxmelitensis</i>                    |                                                               |
| Vogg et al. [93]      | 2019                    | Hydrozoa (1)       | <i>Hydra oligactis</i> ; <i>Hydra viridissima</i>   | Gene evolution; RTKs; developmental genes                     |
| Hamada et al. [69]    | 2020                    | Hydrozoa (1)       | <i>Hydra viridissima</i>                            | Symbiosis; immune response; repetitive DNA; Homeobox          |
| IRIDIAN GENOMES [57]  | 2020                    | Cubozoa (3)        | <i>Alatinidae sp.</i>                               | not_informed                                                  |
|                       |                         |                    | <i>Carybdea marsupialis</i>                         |                                                               |

|                  |      |               |                                                                    |                                                    |
|------------------|------|---------------|--------------------------------------------------------------------|----------------------------------------------------|
|                  |      |               | <i>Tamoya ohboya</i>                                               |                                                    |
|                  |      | Hydrozoa (2)  | <i>Cladonema radiatum</i>                                          |                                                    |
|                  |      |               | <i>Eutima</i> sp. BMK-2020                                         |                                                    |
|                  |      | Scyphozoa (4) | <b><i>Aurelia coerulea</i></b>                                     |                                                    |
|                  |      |               | <b><i>Chrysaora achlyos</i></b>                                    |                                                    |
|                  |      |               | <b><i>Chrysaora chesapeakei</i></b>                                |                                                    |
|                  |      |               | <b><i>Chrysaora fuscescens</i></b>                                 |                                                    |
|                  |      | Staurozoa (1) | <i>Calvadosia cruxmelitensis</i>                                   |                                                    |
| Li et al. [58]   | 2020 | Scyphozoa (1) | <b><i>Rhopilema esculentum</i></b>                                 | Gene evolution; toxins                             |
| Nong et al. [65] | 2020 | Scyphozoa (2) | <b><i>Sanderia malayensis</i>,<br/><i>Rhopilema esculentum</i></b> | Gene evolution; small RNAs; micro-syteny; Homeobox |
| Xia et al. [70]  | 2020 | Scyphozoa (1) | <b><i>Chrysaora quinquecirrha</i></b>                              | Gene and gene feature evolution; repetitive DNA    |
| Xia et al. [94]  | 2020 | Scyphozoa (1) | <b><i>Chrysaora quinquecirrha</i></b>                              | Assembly improvement report                        |
| UMCG             | 2021 | Scyphozoa (1) | <b><i>Cassiopea andromeda</i></b>                                  | not_informed                                       |

640

641 **Figure 1 - Phylogenetic distribution of genomic information in Medusozoa.** A) Number  
642 of described species and number of species with genomic data; B) Chromosome number (2n)  
643 range; C) Genome size (Mbp) range taking into account Flow Cytometry and Feulgen  
644 Densitometry estimations; D) Total number of available assemblies and number of species  
645 with assembled genomes. In B) and C) single values were also included when only one  
646 species was characterized. Tree topology is explained in the methods section. Information  
647 used for this graph is available at Supplementary file S3 Table S2.

648 **Figure 2 - Assembly and genome features.** In A) is reported (from left to right): mean  
649 assembly length per class, GC content (%) per class, number of contigs and scaffolds per  
650 assembly coloured by class, contig and scaffold N50 (in Kbp) per assembly coloured by class,

651 and count of assemblies of each class corresponding to the different BGP-metric values,  
652 where X and Y correspond to contig and scaffold N50 respectively, and Z to chromosome  
653 assignment (see methods section). In B) is reported (from left to right): mean repeat length  
654 (Mbp) in assembly per class, mean total number of genes per class, mean exon number (count  
655 per gene) per class, and mean gene, intron and exon length (Kbp) per assembly coloured by  
656 class. The yellow arrowhead indicates *S. malayensis* gene features (See Box). All other  
657 references are specified in the figure. Mbp=millions of base pairs. Information used for this  
658 graph is available at Supplementary file S3 Tables S4-6.

659 **Figure 3 - BUSCO Metazoa gene distribution in Medusozoa assemblies.** Each column  
660 corresponds to a gene and each row an assembly. Columns were ordered based on presence  
661 from left to right and the least present genes (n=96) are shown in detail. Genes absent in all  
662 or almost all assemblies (more than 80% of absence) are indicated in red; genes also reported  
663 absent [20] are indicated in bold; genes absent in specific lineages are indicated with yellow  
664 rectangles. Higher quality assemblies are indicated in orange (BGP-metric > 1.0.0). The  
665 assembly with the highest quality score for BGP-metric is indicated by an orange circle and  
666 corresponds to *Rhopilema esculentum* [58]. Information used for this graph and complete  
667 genes names are available at Supplementary file S3 Table S7.

### 668 **Supplementary Material**

669 Supplementary file S1. Dataset 1. Genome report sheet.

670 Supplementary file S2. Table S1. Species information considering chromosome number,  
671 genome size and genomic datasets.

672 Supplementary file S3. Supplementary tables 2-8 - All information used for constructing graphs  
673 presented in this work. Includes summary information of Figure 1 (table S2), genome  
674 resources used in this study (table S3), assembly statistics for Figure 2A (table S4), genome



675 features of Figure 2B (table S5, S6) and BUSCO results for Figure 3 and Supplementary figure  
676 S4 (tables S7, S8).

677 Supplementary file S4. - BUSCO Eukaryota gene distribution in Medusozoa assemblies. Each  
678 column corresponds to a gene and each row an assembly. Information used for this graph is  
679 available at Supplementary file S3 Table S8.

680 Supplementary file S5 - Dataset 2. Information and metadata obtained from NCBI.

681 Supplementary file S6 - Dataset 3. Original results from AGAT and Galaxy server (BUSCO).

682 Supplementary file S7 - Dataset 4. Command line to retrieve data from NCBI and to generate  
683 new results.

684 Supplementary file S8 - Dataset 5. Figures in vectorial format

685

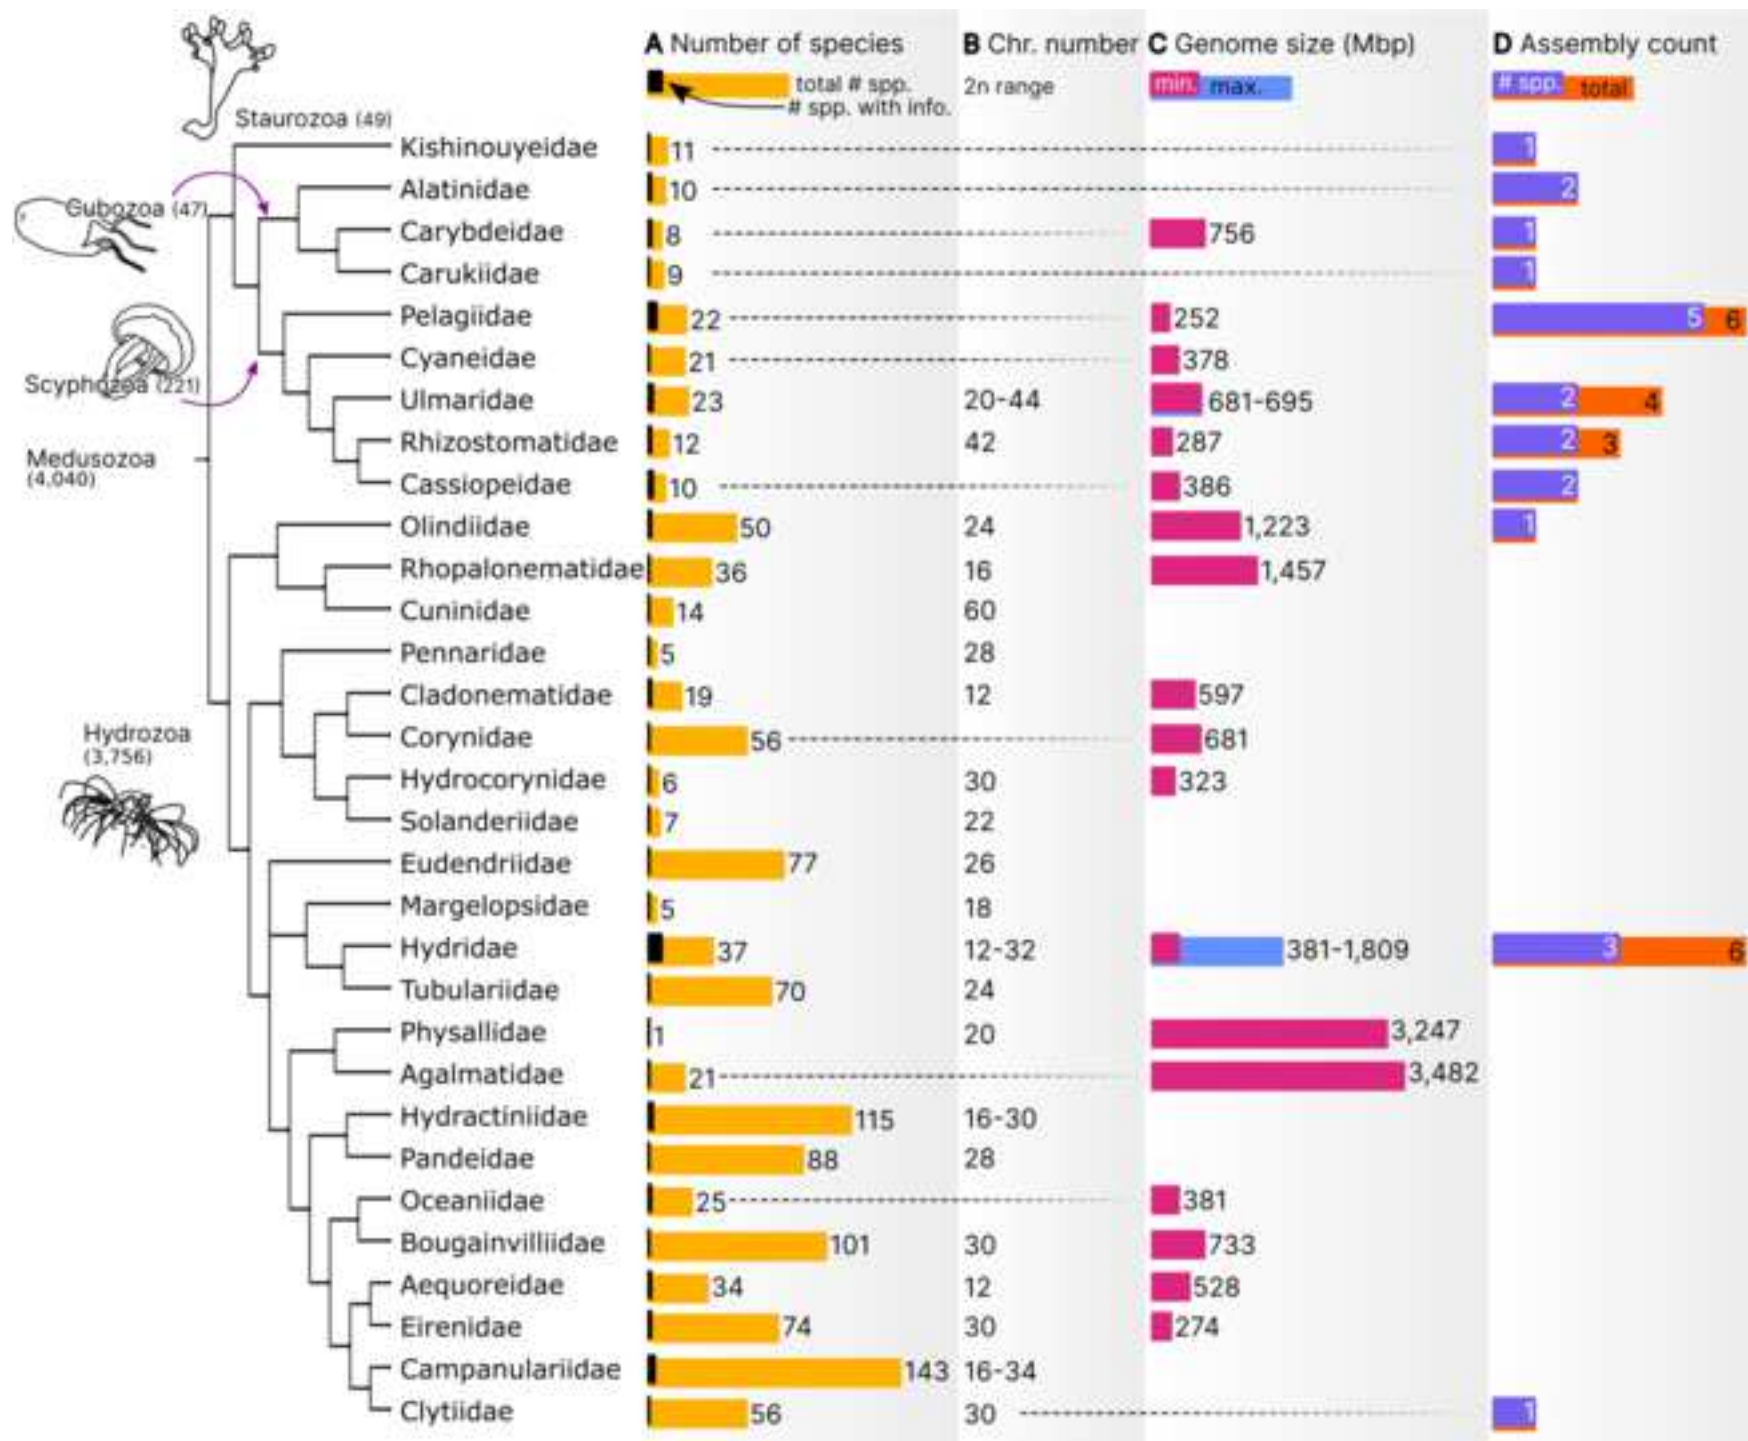

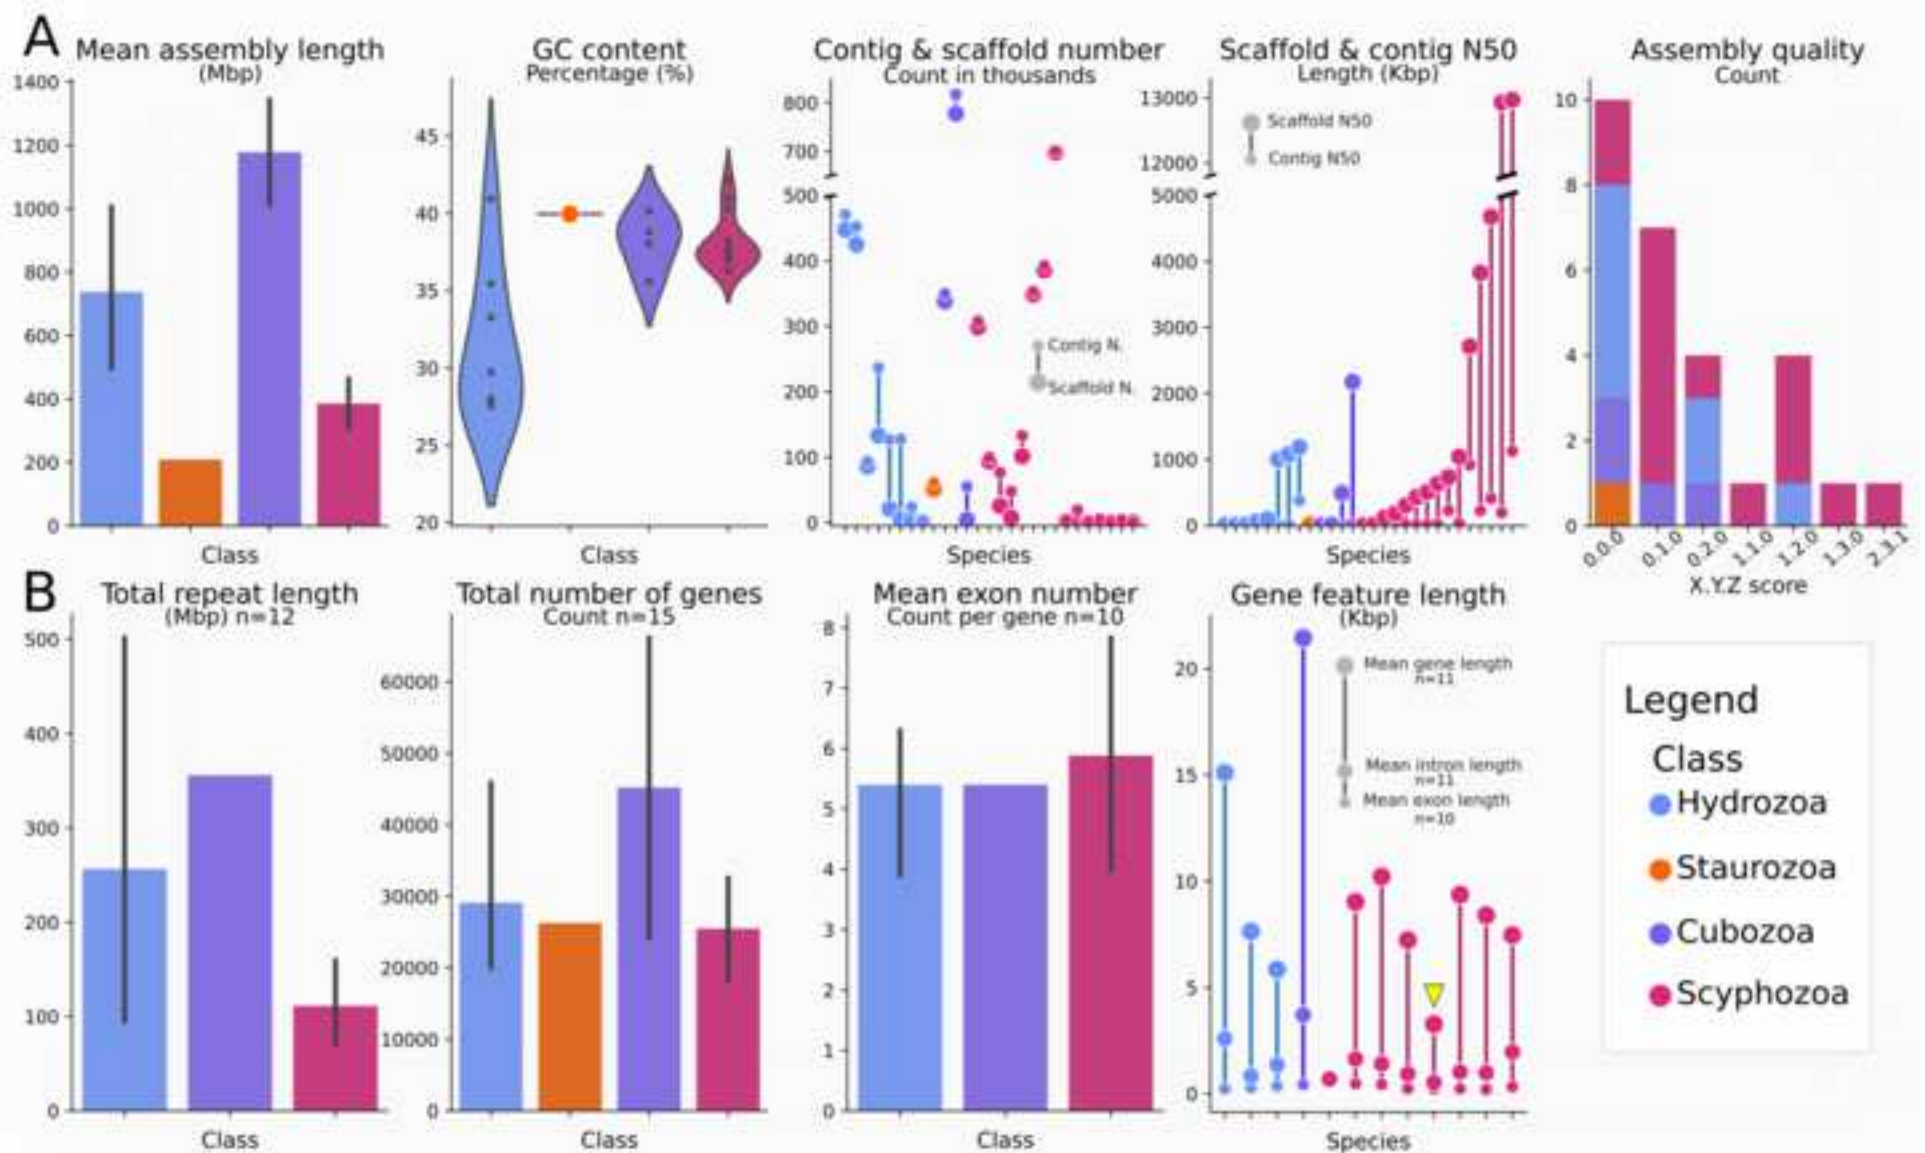





Click here to access/download

**Supplementary Material**

Supplementary\_file\_S1\_Dataset\_1\_genome\_report\_sheet.xlsx

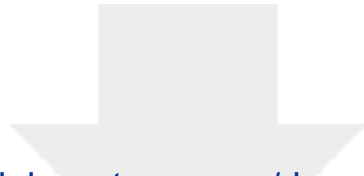

[Click here to access/download](#)

**Supplementary Material**

**Supplementary\_file\_S2\_Table\_S1.xlsx**

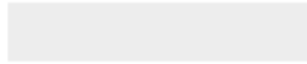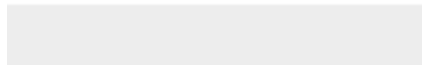



Click here to access/download  
**Supplementary Material**  
Supplementary\_file\_S3\_TablesS2-  
8\_Figures\_Information.xlsx

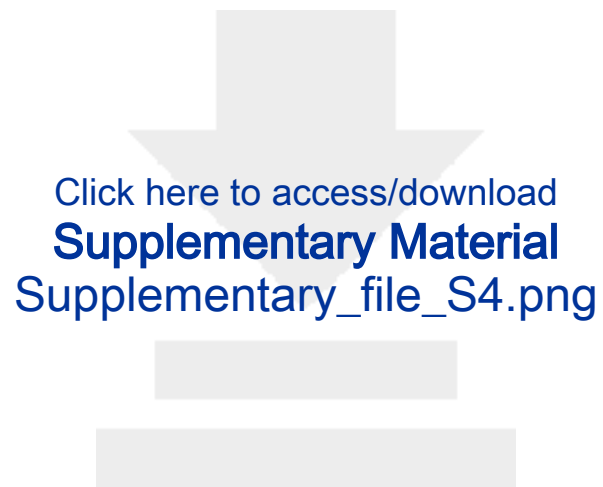



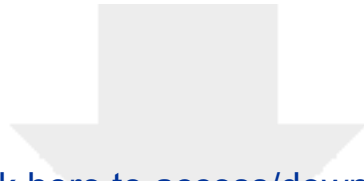

Click here to access/download

**Supplementary Material**

Supplementary\_file\_S7\_Dataset\_4\_command\_line.html

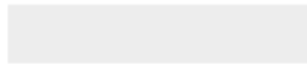

Supplement: giac036_giga-d-21-00404_original_submission.pdf [file giac036_giga-d-21-00404_original_submission.pdf]
