# Supplementary material for: The state of Medusozoa genomics: current evidence and future challenges
Source: PubMed Central journal article supplement (PMC9112765; doi:10.1093/gigascience/giac036), 2022-05-17
Supplement: giac036_giga-d-21-00404_r1_revision_1.pdf [file giac036_giga-d-21-00404_r1_revision_1.pdf]

|                                                      |                                                                                                                                                                                                                                                                                                                                                                                                                                                                                                                                                                                                                                                                                                                                                                                                                                                                                                                                                                                                                                                                                                                                                                                                                                                                                                                                                                                                                                   |                                      |
|------------------------------------------------------|-----------------------------------------------------------------------------------------------------------------------------------------------------------------------------------------------------------------------------------------------------------------------------------------------------------------------------------------------------------------------------------------------------------------------------------------------------------------------------------------------------------------------------------------------------------------------------------------------------------------------------------------------------------------------------------------------------------------------------------------------------------------------------------------------------------------------------------------------------------------------------------------------------------------------------------------------------------------------------------------------------------------------------------------------------------------------------------------------------------------------------------------------------------------------------------------------------------------------------------------------------------------------------------------------------------------------------------------------------------------------------------------------------------------------------------|--------------------------------------|
| <b>Manuscript Number:</b>                            | GIGA-D-21-00404R1                                                                                                                                                                                                                                                                                                                                                                                                                                                                                                                                                                                                                                                                                                                                                                                                                                                                                                                                                                                                                                                                                                                                                                                                                                                                                                                                                                                                                 |                                      |
| <b>Full Title:</b>                                   | The state of Medusozoa genomics: current evidence and future challenges                                                                                                                                                                                                                                                                                                                                                                                                                                                                                                                                                                                                                                                                                                                                                                                                                                                                                                                                                                                                                                                                                                                                                                                                                                                                                                                                                           |                                      |
| <b>Article Type:</b>                                 | Review                                                                                                                                                                                                                                                                                                                                                                                                                                                                                                                                                                                                                                                                                                                                                                                                                                                                                                                                                                                                                                                                                                                                                                                                                                                                                                                                                                                                                            |                                      |
| <b>Funding Information:</b>                          | Coordenação de Aperfeiçoamento de Pessoal de Nível Superior (88882.377420/2019-01)                                                                                                                                                                                                                                                                                                                                                                                                                                                                                                                                                                                                                                                                                                                                                                                                                                                                                                                                                                                                                                                                                                                                                                                                                                                                                                                                                | Miss Mylena Daiana Santander         |
|                                                      | Fundação de Amparo à Pesquisa do Estado de São Paulo (FAPESP 2016/04560-9)                                                                                                                                                                                                                                                                                                                                                                                                                                                                                                                                                                                                                                                                                                                                                                                                                                                                                                                                                                                                                                                                                                                                                                                                                                                                                                                                                        | Mr. Maximiliano Manuel Maronna       |
|                                                      | Fundação de Amparo à Pesquisa do Estado de São Paulo (FAPESP 2015/20139-)                                                                                                                                                                                                                                                                                                                                                                                                                                                                                                                                                                                                                                                                                                                                                                                                                                                                                                                                                                                                                                                                                                                                                                                                                                                                                                                                                         | Miss Sônia Cristina da Silva Andrade |
| <b>Abstract:</b>                                     | <p>Medusozoa is a widely distributed ancient lineage that harbors one-third of Cnidaria diversity divided into four classes. This clade is characterized by the succession of stages and modes of reproduction during metagenic lifecycles, and includes some of the most plastic body plans and life cycles among animals. The characterization of traditional genomic features, such as chromosome numbers and genome sizes, was rather overlooked in Medusozoa and many evolutionary questions still remain unanswered. Modern genomic DNA sequencing in this group started in 2010 with the publishing of the <i>Hydra vulgaris</i> genome and has experienced an exponential increase in the past three years. Therefore, an update of the state of Medusozoa genomics is warranted. We reviewed different sources of evidence, including cytogenetic records and high-throughput sequencing (HTS) projects. We focused on four main topics that would be relevant for the broad Cnidaria research community: 1) taxonomic coverage of genomic information; 2) continuity, quality and completeness of HTS datasets; 3) overview of the Medusozoa specific research questions approached with genomics; and 4) the accessibility of data and metadata. We highlight a lack of standardization in genomic projects and their reports, and reinforce a series of recommendations to enhance future collaborative research.</p> |                                      |
| <b>Corresponding Author:</b>                         | Mylena Daiana Santander, Bachelor<br>Universidade de Sao Paulo Instituto de Biociencias<br>São Paulo, SP BRAZIL                                                                                                                                                                                                                                                                                                                                                                                                                                                                                                                                                                                                                                                                                                                                                                                                                                                                                                                                                                                                                                                                                                                                                                                                                                                                                                                   |                                      |
| <b>Corresponding Author Secondary Information:</b>   |                                                                                                                                                                                                                                                                                                                                                                                                                                                                                                                                                                                                                                                                                                                                                                                                                                                                                                                                                                                                                                                                                                                                                                                                                                                                                                                                                                                                                                   |                                      |
| <b>Corresponding Author's Institution:</b>           | Universidade de Sao Paulo Instituto de Biociencias                                                                                                                                                                                                                                                                                                                                                                                                                                                                                                                                                                                                                                                                                                                                                                                                                                                                                                                                                                                                                                                                                                                                                                                                                                                                                                                                                                                |                                      |
| <b>Corresponding Author's Secondary Institution:</b> |                                                                                                                                                                                                                                                                                                                                                                                                                                                                                                                                                                                                                                                                                                                                                                                                                                                                                                                                                                                                                                                                                                                                                                                                                                                                                                                                                                                                                                   |                                      |
| <b>First Author:</b>                                 | Mylena Daiana Santander, Bachelor                                                                                                                                                                                                                                                                                                                                                                                                                                                                                                                                                                                                                                                                                                                                                                                                                                                                                                                                                                                                                                                                                                                                                                                                                                                                                                                                                                                                 |                                      |
| <b>First Author Secondary Information:</b>           |                                                                                                                                                                                                                                                                                                                                                                                                                                                                                                                                                                                                                                                                                                                                                                                                                                                                                                                                                                                                                                                                                                                                                                                                                                                                                                                                                                                                                                   |                                      |
| <b>Order of Authors:</b>                             | Mylena Daiana Santander, Bachelor                                                                                                                                                                                                                                                                                                                                                                                                                                                                                                                                                                                                                                                                                                                                                                                                                                                                                                                                                                                                                                                                                                                                                                                                                                                                                                                                                                                                 |                                      |
|                                                      | Maximiliano Manuel Maronna, PhD                                                                                                                                                                                                                                                                                                                                                                                                                                                                                                                                                                                                                                                                                                                                                                                                                                                                                                                                                                                                                                                                                                                                                                                                                                                                                                                                                                                                   |                                      |
|                                                      | Joseph F Ryan, PhD                                                                                                                                                                                                                                                                                                                                                                                                                                                                                                                                                                                                                                                                                                                                                                                                                                                                                                                                                                                                                                                                                                                                                                                                                                                                                                                                                                                                                |                                      |
|                                                      | Sônia Cristina da Silva Andrade, PhD                                                                                                                                                                                                                                                                                                                                                                                                                                                                                                                                                                                                                                                                                                                                                                                                                                                                                                                                                                                                                                                                                                                                                                                                                                                                                                                                                                                              |                                      |
| <b>Order of Authors Secondary Information:</b>       |                                                                                                                                                                                                                                                                                                                                                                                                                                                                                                                                                                                                                                                                                                                                                                                                                                                                                                                                                                                                                                                                                                                                                                                                                                                                                                                                                                                                                                   |                                      |
| <b>Response to Reviewers:</b>                        | <p>Editor</p> <p>"Your manuscript "The state of Medusozoa genomics: past evidence and future challenges" (Review Article; GIGA-D-21-00404) has been assessed by three reviewers. Based on these reports, I am pleased to inform you that it is potentially</p>                                                                                                                                                                                                                                                                                                                                                                                                                                                                                                                                                                                                                                                                                                                                                                                                                                                                                                                                                                                                                                                                                                                                                                    |                                      |

acceptable for publication in GigaScience, once you have carried out some essential revisions suggested by our reviewers. Their reports are below.

I'd like to highlight three points:"

We are very appreciative of the excellent suggestions from the reviewers and editor. We have done our best to address each point and we feel that the manuscript has been greatly improved as a result of the review process. Thank you for the time dedicated to our manuscript. We provide a point-by-point answer to each suggestion. We also provide a new main text and a copy of the original text with all the changes kept as tracks. Line numbers in this letter are referenced to the new main text file in the submission PDF. Original comments made by the editor and the reviewers are indicated in bold or between quotation marks. We also provide a formatted copy of the response to the reviewers as a separate file at the end of the submission PDF.

"1. Two of the reviewers mention that the "recommendations" would benefit if it would make clearer if there are any Medusozoa-specific recommendations (in addition to advice that is generally applicable to all animal genome projects)"

We have added the following to address this point generally on line 422:

The following are suggestions to enhance genome projects and outcomes, and to promote open and collaborative research. These suggestions can be broadly applied to any genome project and are in line with those proposed by many initiatives and consortia (e.g. [33,100,101]). Nevertheless, it is worth reinforcing and discussing them in the context of this review since genome projects are more and more often being initiated in research laboratories that have historically been more focused on other aspects of medusozoan biology and may not be as familiar with these general practices:

We have added the following to point #3 that refers to where to deposit data on lines 446:

A Medusozoa-centric database with long-term maintenance is still lacking for the community (e.g. Mollusca clade [104]); but many open repositories can serve this purpose with low or no costs considering the size of the aforementioned outputs. There are open topic-centric repositories (e.g. Dfam [105] for repetitive DNA), general repositories (e.g. FigShare, Zenodo; or even NCBI for annotation tracks) as well as personal or institutional ones. Many of the reviewed genomic projects already made use of these repositories but failed to deposit some of the outputs. A solution for this inconvenience is to update submissions or create novel ones (e.g. submit annotations to NCBI or ENA) to deposit the missing outputs.

"2. Reviewer 1 recommends to make your code public, and I strongly support this, as it is also in line with our journal guidelines. You can also host code and supporting data in our repository GigaDB - our data curators will be happy to help. Please attach an open (OSI-compliant) licence to any scripts/code. (<https://opensource.org/licenses/>)"

All the command lines used in this work were originally specified in the Supplementary File S7 of the original submission (Supplementary File S2 in the current version) but it was not properly indicated in the material and methods section. We corrected this issue by adding the following sentence on lines 122:

The command line used for retrieving genetic information and metadata, for statistics calculation and the code used for graph generation are available at Supplementary file S2 and S3.

We have also added the scripts used for constructing graphs in Supplementary file S3 (as suggested by reviewer 1). All the software used in this work is open and was properly referenced.

We deposited all supplementary files in Figshare and GigaDB and included a statement of open license to scripts on lines 518:

#### Data availability

All collected information, outputs and scripts supporting new results are available in the supplementary files S1-S9 in Figshare [114] and in GigaDB [115].

"3. Although not mentioned by the reviewers, I feel your manuscript would be more interesting for readers from outside the medusozoa community if you explained in a bit more detail the actual biological questions that have been addressed with these genomes; such as toxins, metazoan evolution / body plan evolution, Hox genes, immunity, etc.. These topics are mentioned in the introduction, but I feel they could be picked up again in a bit more detail in the discussion, to illustrate the biological insights gained from the genome projects."

We have added two paragraphs that highlight the insight genome projects bring understanding medusozoa biology.

Starting on line 301:

The complex nature of Medusozoa venom has been investigated by a number of transcriptomic, proteomic and genomic studies (reviewed in [26]). Several putative toxin genes and domains have been identified, covering a significant part of the wide range of known toxins [20,22,59,73]. In Scyphozoa, toxin-like genes were often recovered as multicopy sets [20,59]. Moreover, in *R. esculentum* toxin-like genes were also tandemly arranged and several of them were located nearby in chromosome 7, suggesting that the observed organization might influence toxin co-expression[59]. Minicollagens, which are major components of nematocysts, also had a clustered organization and a pattern of co-expression in *Aurelia* [20]. These examples add to various clustered genes described in Cubozoa, Hydrozoa and Anthozoa, and would indicate that gene clustering and operon-like expression of toxin genes is widespread in Cnidaria ([20] and references therein).

and starting on line 329:

The complex life cycle of Medusozoa has resulted from the combination of both ancestral and novel features. *Aurelia*, *Morbakka virulenta* and *Clytia hemisphaerica* have significantly different patterns of gene expression across stages and during transitions [19–21]. Differentially expressed genes include many conserved ancestral families of transcription factors [19–21]; there is also a considerable amount of the putative lineage-restricted genes that show differential expression in the adult stages [20,21]. A few of these “novel” medusozoan genes have been described, such as novel myosin-tail proteins that are absent from Anthozoa and represent markers of the medusae striated muscles [20]. It was suggested that the evolution of the Medusozoa complex life cycle would therefore have involved the rewiring of regulatory pathways of ancestral genes and the contribution of new ones [19–21]. As such, the body plan and life cycle simplifications observed in *Clytia* and *Hydra*, respectively, would be the result of loss of transcription factors involved in their development [21]. Finally, the significance of many of the putative Medusozoa and species-specific genes remain to be elucidated.

"4. For a review article, please also feel free to add illustrations/photos of relevant medusozoa species, if you wish (but please check with any copyright holder, if applicable - images will be published under an open cc-by licence)."

We added a new figure (Figure 1) with photographs of example species of each Medusozoa class. Some photographs (Figure 1 A, B, D, E) were recovered from an online open database called Cifonauta, available under open cc-by license, and it was properly cited. The remaining photographs were provided by Marta Chiodin (Figure 1C), Joseph Ryan (co-author; Figure 1 F, G), with permission to publish under CC-BY license. As a result of the addition of a new Figure 1, all figures were renumbered accordingly.

#### Reviewer 1

"In this paper, Santander et al. review the field of medusozoan genomics, which has burgeoned in the last three or so years. Overall, I found this a clear, interesting read. The manuscript is well-written, the figures are valuable, and the authors nicely describe

the history of the research as well as the state of the field. The findings are not monumental, but it is a worthwhile exercise to survey the rapidly-increasing dataset of genomes in a systematic way, and this review will be a useful start for further work in medusozoan comparative genomics. I rarely suggest a paper should be accepted during the first round of review, and I usually try to provide more constructive feedback than I do here, but I really don't have much too much to quibble with. A couple thoughts are provided below:

1. The set of suggestions for future work near the end of the document are fine, but they could apply broadly to any genome project. I encourage the authors to consider whether there are specific problems related to medusozoan evolution that are hampered by inconsistencies between studies, and discuss how their recommendations (or additional ones) could help resolve them."

This comment also addresses reviewer #3's first point as well. We have added the following, which acknowledges that some of our recommendations are general to all genome projects and provides justification for why it is important to include these in this review on line 422:

The following are suggestions to enhance genome projects and outcomes, and to promote open and collaborative research. These suggestions can be broadly applied to any genome project and are in line with those proposed by many initiatives and consortia (e.g. [33,100,101]). Nevertheless, it is worth reinforcing and discussing them in the context of this review since genome projects are more and more often being initiated in research laboratories that have historically been more focused on other aspects of medusozoan biology and may not be as familiar with these general practices:

In the recommendation regarding depositing results in public databases we discussed its importance and how metadata can be improved when datasets were already made public on line 431:

Frequently, data and metadata that are described in the original articles or deposited in repositories are not submitted to public databases. Tracking information from multiple sources is time consuming and prone to error. Databases and repositories enable the improvement of metadata after the initial releases, by the addition of new or corrected information (e.g. publication information) from the authors. We believe that this kind of data curation would improve the state of Medusozoa genomics not only by enabling downstream analysis after the publication, but also enabling the detection of methodological options (e.g. tissue selection; sequencing technology) that would improve the quality of the results.

In the section about depositing intermediate outputs, we have added information on the state of relevant taxon-specific databases on line 446:

Medusozoa-centric database with long-term maintenance is still lacking for the community (e.g. Mollusca clade [104]); but many open repositories can serve this purpose with low or no costs considering the size of the aforementioned outputs.

We added a paragraph discussing potential problems and benefits related to proper method description on line 460.

The latter suggestions (3-6) are mainly related to providing detailed methodologies of bioinformatic analyses. First, proper method and results descriptions can help to recover metadata and criteria usually not available in large sequence repositories. Second, comparative analyses depend upon standardization at different levels and significant sample sizes. The inclusion of species in downstream analyses is limited by data availability and proper description of previous analyses, custom software and results.

We added a recommendation about engaging in community-wide discussions, and highlighted potential venues that would be appropriate for discussing medusozoan genomics standards starting on line 466:

7. Engage in community-driven conversations about standards, guidelines and species priorities. There are a number of taxon-specific meetings that would be appropriate venues to engage in these conversations including the International Conference on Coelenterate Biology (~decennial; [106]), the International Jellyfish Blooms Symposium (~triennial), Cnidofest (~biennial; [107]), Tutzung workshop (~biennial; [108]), and Cnidofest zoom seminar series. In addition, satellite meetings at larger annual meetings (e.g. the Society for Integrative and Comparative Biology (SICB) or the Global Invertebrate Genomics Alliance (GIGA [101])) could provide appropriate venues to facilitate discussions on how the community can best move forward as more and more genomic data come online.

We close the section with a paragraph that explains how adhering to standards will benefit the medusozoan community on line 475:

The adoption of best practices in the Medusozoa genomics community will pave the way for major breakthroughs regarding understanding the genomic basis for several evolutionary innovations that arose within and in the stem lineage of Medusozoa. Similar advances were achieved with extensive taxon sampling at broader scales, where 25 novel core gene groups enriched in regulatory functions might be underlying the emergence of animals [109,110]. Medusozoa innovations have puzzled the community for decades [5,7,11,111] and include the origin of the medusa, the loss of polyp structures, the establishment of symbiosis, the blooming potential, and the evolution of an extremely potent venom. A deeper understanding of the genomic events driving these innovations will require accurate identifications of a number of key genomic features including (but not limited to) single copy orthologs, gene losses, lineage-specific genes, gene family expansions and non-coding regulatory sequences.

Related to this last point, we also suggest to read the added sentences after reviewer #3 comment on line 314:

Recent evidence proved that the detection of lineage-specific genes, and other analyses relying on accurate annotation and orthology prediction, can be significantly biased by methodological artifacts [79–83]; several problems have been identified, such as low taxon sampling, heterogeneous gene predictions, and failure of detecting distant homology and fast-evolving orthologues. These considerations are highly relevant in Medusozoa, as comparisons are often made, by necessity, with distantly related species (e.g. Anthozoa has been estimated to have diverged from Medusozoa around 800 million years ago [84]).

"2. I would encourage the authors to practice what they preach in terms of transparency, and make the code they used in their methods public (e.g. statswrapper.sh, AGAT, BUSCO, ETE Toolkit, Matplotlib, Seaborn). The code does not need to be executable, but a supplemental text and/or repository with as much of the starting data and commands executed as possible would make it easier for others to replicate this work and apply it to future comparative genomics projects."

All the command line used in this work was originally specified in the Supplementary S7 of the original submission but we did not properly indicate this in the material and methods section. We corrected this issue by adding a sentence in the corresponding section as indicated below (note: this required re-numbering the supplementary files so Supplementary file S7 is now S2). We also included the scripts used for constructing graphs. All the packages and softwares used in the command line and in the custom scripts (statswrapper.sh, AGAT, BUSCO, ETE Toolkit, Matplotlib, Seaborn) are open. We have added the following on line 122:

The command line used for retrieving genetic information and metadata, for statistics calculation and the code used for graph generation are available at Supplementary file S2 and S3.

"3. Line 236: "...ploidy level, heterochromatin contente." This should be changed to "...ploidy level, and heterochromatin content.""

This error was corrected.

"4. Line 253-254: "...evolution of genome size is a long-standing question that is included in the so-called C-value Enigma [40]." The authors provide a citation, but I think this sentence would be stronger with a brief explanation of what the C-value Enigma is. Medusozoans are a great example of this "enigma", so it's worth reinforcing."

We have added the following to clarify the C-value enigma on line 274:

... "C-value Enigma" [41]. This name stems from the difficulty elucidating the evolutionary forces (e.g. drift and natural selection) that have given rise and serve to maintain variations in genome size, the mechanisms of genome size change, and the consequences of these variations at an organismal level [41]. Several conflicting hypotheses have been postulated to explain this puzzle with most having experimental support in some but not all lineages (reviewed in [68]).

Reviewer 2

"This manuscript offers a reanalysis of all available nuclear genomic data published on medusozoans. It represents a well thought, and timely review of the available data, systematically comparing genomic features (repeated elements, intro/exon/gene size and numbers, chromosome numbers...) and genomic assemblies (available data, assembly quality and size...) in the different medusozoan classes. It largely confirms the results obtained from analysis of single species. It also provides useful guidelines for future standardization of genomic projects focused on medusozoans."

Minor comments and suggested corrections:

1. Line 118: How was "compiled all genomic and HTS metadata reference in this review", manually? If not, please provide the scripts used for this task."

The information was collected by a combination of automatic and manual retrieval, as it was superficially mentioned in the first paragraph of the Material and Methods section. We added a few sentences to clarify this point as follows below. All of the command lines used for these analyses were originally specified in the Supplementary S7 of the original submission but this was not properly indicated in the material and methods section. We corrected this issue by adding a sentence in the corresponding section as indicated below (note: this required re-numbering the supplementary files so Supplementary file S7 is now S2).

First, we clarified the automatic and manual retrieval on line 91: Our main source of genomic information and metadata was NCBI Genome (Assembly, Genomes, Nucleotide, Taxonomy and SRA; [27]). We retrieved data automatically using entrez-direct v.13.9 and NCBI datasets v. 12.12. For information not present in NCBI, we checked published articles for proper information collection, as well as personal repositories mentioned in the associated articles. We clarified that the merging of manually and automatically retrieved information was merged/compiled manually, and specified the supplementary material where scripts and command lines were deposited on line 119: We manually compiled all genomic information and HTS metadata referenced in this review using a report model based on previous works and public databases such as NCBI (Supplementary file S1; [29,41,42]). The command line used for retrieving genetic information and metadata, for statistics calculation and the code used for graph generation are available at Supplementary file S2 and S3.

"2. Line 236: correct contente"

This error was corrected.

"3. Line 326: The sentence starting with "Moreover, even..." is unclear. Please clarify or delete."

To clarify this point we deleted the original sentence and added the following on line 403:

In addition, submission to the large databases like SRA and GenBank can lead to the automatic detection of specific issues such as contamination or annotation errors that might otherwise not be detected.



"4. Line 389: correct "proyectos""

This error was corrected.

"5. Figure 1: it would be useful to indicate in this figure genome sizes calculated from genomic assemblies, in addition to genome sizes calculated from flow cytometry and Feulgen densitometry estimations; either as a new column or using another color in C"

We prefer to maintain the original version of the figure. The following reasons were considered for not adding "assembly length" in figure 1 (now renumbered as Figure 2):

- Assembly length would not be a robust estimation of genome size because different causes can lead to biased results, especially for short reads projects. High heterozygosity and incomplete collapsing of haplotypes can lead to genome size overestimation. Sequencing bias, as well as repetitive DNA misassembly, can lead to underestimations of genome size (see <https://doi.org/10.1371/journal.pone.0062856>; [10.1111/1755-0998.12933](https://doi.org/10.1111/1755-0998.12933); <https://doi.org/10.1101/2021.04.09.438957>; for further details)

- Adding this information in Figure 1 (now renumbered as Figure 2) could hinder visualization as already many variables are being simultaneously plotted.

- Distribution of assembly length was specified in Figure 2a (now renumbered as Figure 3a).

"6. SM\_Table2: Supplementary Material S2 - Table S1 - please correct in the title "condidering"."

This error was corrected.

Reviewer 3

"Santander et al. review the state of genome assemblies and cytogenetics of Medusozoa. This review captures the progression of the sequencing efforts in the past decade and how the field is moving with new technological advances. From their assessment of the literature and unpublished data, they found that a weakness in their community is a general lack of standardization in analysis and limited availability of intermediate assembly components, such as the repeat libraries, and associated metadata. In the end they provide recommendations for standards to be applied to ongoing and future genomic projects.

1. I felt that these recommendations fell short of extending beyond basic requirements of publishing genomes today. While these recommendations are in line with recommendations of other genomic consortia (Vertebrate Genomes Project [Rhieet al. 2021, Nature], Sanger/Moore Aquatic Symbiosis Genomics, etc.) and most publishers including GigaScience (deposit data, reproducible methods, code availability statements, etc), they are quite general. I was left wondering if this was a commentary on the whole field of genomics. "

Reviewer #1 had a very similar comment. We have added the following, which acknowledges that some of our recommendations are general to all genome projects and provides justification for why it is important to include these in this review on lines 422:

The following are suggestions to enhance genome projects and outcomes, and to promote open and collaborative research. These suggestions can be broadly applied to any genome project and are in line with those proposed by many initiatives and consortia (e.g. [33,100,101]). Nevertheless, it is worth reinforcing and discussing them in the context of this review since genome projects are more and more often being initiated in research laboratories that have historically been more focused on other aspects of medusozoan biology and may not be as familiar with these general practices:

"2. To that end, are there specific recommendations regarding medusozoans that would enhance data usage community wide that could be stated here? "

As a response to point, which was also raised by reviewer #1 we added several sentences and paragraphs. Specifically, the manuscript now includes a discussion of how curational steps on database metadata could enhance data usage. It also includes a discussion about the lack of taxon-specific databases appropriate for Medusozoa, which may inspire such an effort in the near future. In addition, our recommendation that conversations regarding the state of medusozoan genomics take place at taxon-specific meetings should lead to enhanced data usage.

On line 431:

Frequently, data and metadata that are described in the original articles or deposited in repositories are not submitted to public databases. Tracking information from multiple sources is time consuming and prone to error. Databases and repositories enable the improvement of metadata after the initial releases, by the addition of new or corrected information (e.g. publication information) from the authors. We believe that this kind of data curation would improve the state of Medusozoa genomics not only by enabling downstream analysis after the publication, but also enabling the detection of methodological options (e.g. tissue selection; sequencing technology) that would improve the quality of the results.

On line 446:

A Medusozoa-centric database with long-term maintenance is still lacking for the community (e.g. Mollusca clade [94]); but many open repositories can serve this purpose with low or no costs considering the size of the aforementioned outputs.

On line 466:

7. Engage in community-driven conversations about standards, guidelines and species priorities. There are a number of taxon-specific meetings that would be appropriate venues to engage in these conversations including the International Conference on Coelenterate Biology (~decennial; [106]), the International Jellyfish Blooms Symposium (~triennial), Cnidofest (~biennial; [107]), Tutzing workshop (~biennial; [108]), and Cnidofest zoom seminar series. In addition, satellite meetings at larger annual meetings (e.g. the Society for Integrative and Comparative Biology (SICB) or the Global Invertebrate Genomics Alliance (GIGA [101])) could provide appropriate venues to facilitate discussions on how the community can best move forward as more and more genomic data come online.

We also provided a link in the data availability statement to the online version of the Supplementary file 1 in Figshare. This table will be maintained and can be modified/corrected if authors from the original papers contact us. On line 522:

A copy of table S1 will be available upon publication [114] and can be updated upon the original author's request.

"3. Are there established assembly pipelines (i.e. tools that provide the highest quality assemblies from various species) or types of sequencing effort (i.e. long read + HiC maps, transcriptome-informed gene annotation) that should be endorsed as part of your assessment?"

A rigorous assessment of this issue was not possible because Medusozoa genomic datasets are quite heterogeneous (time-scales, technologies, objectives, methods and output quality; all with a small sampling). However, it is a highly relevant topic, and we opted to mention general trends in the main text with a proper citation to more specific bibliography on methods. We added the following paragraph on line 237:

Differences in sequencing strategy and platforms are expected to be linked with assembly quality, both in terms of continuity and completeness. For example, hybrid sequencing plus optical maps and combined evidence-based annotation should generate better results than a short-read sequencing and single-evidence annotation [61,62]. Although this general trend was observed in this review, with most Illumina-only datasets showing lower BGP-metric (Figure 3) and lower completeness (Figure 4),



it is not a granted condition. Some punctual cases can exemplify biological and methodological issues that impose limitations to genome sequencing and assembly: e.g. the difficulty in obtaining chromosome-scale assemblies despite small genome sizes and combined sequencing strategies (Hi-C + short reads+ long reads) [63,64] or the difficulty in extracting high-molecular-weight DNA [20]. Because of the heterogeneity of Medusozoa genomic projects in terms of time periods, objectives, methods and resources, a proper quantitative analysis of the relationship between methods and outcome quality would not be feasible, and we prefer to refer to articles specialized in assessing methods (e.g. [61,62]).

"4. Are there specific taxonomic gaps that should be prioritized (starting Line 238)?"

There are taxonomic gaps in Medusozoa genomics that were mentioned in the "Genomic projects: whos and hows of Medusozoa" section. But we believe criteria for priority should come from community discussions as was carried on by other projects. To remark the importance of filling taxonomic gaps, we added the following sentences on line 466:

7. Engage in community-driven conversations about standards, guidelines and species priorities.

And on line 501:

The distribution of genetic and genomic information presented significant taxonomic gaps in Medusozoa. It is a reasonable scenario since genomic sequencing data is accumulating in many medusozoan lineages. Even so, some of the most species-rich clades with a diverse array of phenotypic and ecological traits have not yet had their genomes sequenced (e.g. Scyphozoa:Coronamedusae, Hydrozoa:Macrocolonia). These, and other, heretofore genomically underexplored lineages provide golden opportunities from which to make major contributions to understanding the evolution of Medusozoa genomes and would be a wonderful contribution to the rest of the Medusozoa research community. Defining candidate species for sequencing can avoid unnecessary doubled efforts. Different international projects recognized this situation and proposed a set of criteria for prioritizing species at other scales, such as the GIGA ([101]).

"5. The majority of the resources you identified only have short-read Illumina data which inevitably means that chromosome-scale assemblies are not possible yet. However, these assemblies are sufficient for gene model comparisons across species (starting on Line 187). Is there a way to standardize gene prediction for cases where short reads may be all that is available?

Re-analysis of gene predictions with different tools may lead to varying estimates and can lead to erroneous orthology assignments (see <https://doi.org/10.1111/jpy.12947>, <https://doi.org/10.1371/journal.pbio.3000862>, and <https://www.biorxiv.org/content/10.1101/2022.01.13.476251v1>). Re-analysis of *Rhopilema* gene content using different tools increases gene predictions closer to the median gene count you've found."

Based on this commentary, we have added several sentences to clarify the problem of comparative analysis based on heterogeneous annotations. This point was explored in the section "The state of Medusozoa genomics: inner and derived knowledge" in relation to articles' conclusions about lineage-specific genes and increases/decreases in gene content. Moreover, this point was also recapitulated at the final part of the recommendations, reinforcing the problem of comparative analysis.

We made the following additions on line 314:

Recent evidence proved that the detection of lineage-specific genes, and other analyses relying on accurate annotation and orthology prediction, can be significantly biased by methodological artifacts [79–83]; several problems have been identified, such as low taxon sampling, heterogeneous gene predictions, and failure of detecting distant homology and fast-evolving orthologues. These considerations are highly relevant in Medusozoa, as comparisons are often made, by necessity, with distantly

related species (e.g. Anthozoa has been estimated to have diverged from Medusozoa around 800 million years ago [84]).

On line 460:

The latter suggestions (3-6) are mainly related to providing detailed methodologies of bioinformatic analyses. First, proper method and results descriptions can help to recover metadata and criteria usually not available in large sequence repositories. Second, comparative analyses depend upon standardization at different levels and significant sample sizes. The inclusion of species in downstream analyses is limited by data availability and proper description of previous analyses, custom software and results.

and on line 475:

The adoption of best practices in the Medusozoa genomics community will pave the way for major breakthroughs regarding understanding the genomic basis for several evolutionary innovations that arose within and in the stem lineage of Medusozoa. Similar advances were achieved with extensive taxon sampling at broader scales, where 25 novel core gene groups enriched in regulatory functions might be underlying the emergence of animals [109,110]. Medusozoa innovations have puzzled the community for decades [5,7,11,111] and include the origin of the medusa, the loss of polyp structures, the establishment of symbiosis, the blooming potential, and the evolution of an extremely potent venom. A deeper understanding of the genomic events driving these innovations will require accurate identifications of a number of key genomic features including (but not limited to) single copy orthologs, gene losses, lineage-specific genes, gene family expansions and non-coding regulatory sequences. In relation to the question: "Is there a way to standardize gene prediction for cases where short reads may be all that is available?"

We are not aware of any pipeline specifically designed to standardize gene prediction for short-read assemblies. One solution would be to re-annotate and annotate all genomes by the same methodology. Another solution would be to use existing annotations and improve them by comparative analysis or by targeting specific gene families of interest. These considerations were added to "Prospects on genomic data and general resources" but not as part of the final recommendations on line 390. An alternative solution for comprehensive comparative analyses is to (re)annotate all genomes with the same pipeline, a task that is laborious and time consuming. Some programs were designed for achieving this task simultaneously in many related species (e.g. [89,90]). Another alternative is to use specific software developed to improve genome annotations by leveraging data from multiple species (e.g. [91,92]) or targeting specific gene families [93,94]. Finally, differences in annotation due to methodological artifacts can be accommodated in comparative analysis if considered as a variable in the statistical tests (e.g. comparing tRNA genes in high and low quality avian genomes [95]).

"6. Regarding the recommendation for depositing intermediates into repositories (#3), is there one established for the community or are you referring to more general ones like Dryad, FigShare, Rebase, etc.? Providing an example genome project or two that shares these associated files might be helpful."

We were referring to general repositories. We have clarified this point in the section titled: "Deposit output results that were fundamental in any of the steps of the analysis" on line 446:

A Medusozoa-centric database with long-term maintenance is still lacking for the community (e.g. Mollusca clade [104]); but many open repositories can serve this purpose with low or no costs considering the size of the aforementioned outputs. There are open topic-centric repositories (e.g. Dfam [105] for repetitive DNA), general repositories (e.g. FigShare, Zenodo; or even NCBI for annotation tracks) as well as personal or institutional ones. Many of the reviewed genomic projects already made use of these repositories but failed to deposit some of the outputs. A solution for this inconvenience is to update submissions or create novel ones (e.g. submit annotations to NCBI or ENA) to deposit the missing outputs.

"7. There can be cost associated with hosting these resources. Do you see that as a barrier to researchers providing this sort of data?"

Although repositories can be expensive, the intermediates we mentioned in

|                                                                                                                                                                                                                                                                                                                                                   |                                                                                                                                                                                                                                                                                                                                                                                                                                                                                                                                                                                                                                                                                                                                                                                                                                                                                                                                                                                                                                                                                                                                                                                                                                                                                                                                                                                                                                                                                                                                                                                                                                                                                                                                                                                                                                                                                                                                                                                                                                                                                                                                                                                                                                                                                                                                                                                                                                            |
|---------------------------------------------------------------------------------------------------------------------------------------------------------------------------------------------------------------------------------------------------------------------------------------------------------------------------------------------------|--------------------------------------------------------------------------------------------------------------------------------------------------------------------------------------------------------------------------------------------------------------------------------------------------------------------------------------------------------------------------------------------------------------------------------------------------------------------------------------------------------------------------------------------------------------------------------------------------------------------------------------------------------------------------------------------------------------------------------------------------------------------------------------------------------------------------------------------------------------------------------------------------------------------------------------------------------------------------------------------------------------------------------------------------------------------------------------------------------------------------------------------------------------------------------------------------------------------------------------------------------------------------------------------------------------------------------------------------------------------------------------------------------------------------------------------------------------------------------------------------------------------------------------------------------------------------------------------------------------------------------------------------------------------------------------------------------------------------------------------------------------------------------------------------------------------------------------------------------------------------------------------------------------------------------------------------------------------------------------------------------------------------------------------------------------------------------------------------------------------------------------------------------------------------------------------------------------------------------------------------------------------------------------------------------------------------------------------------------------------------------------------------------------------------------------------|
|                                                                                                                                                                                                                                                                                                                                                   | <p>recommendation #3 (gene and repetitive models and tracks) are frequently below 1gb. These file sizes can be easily accommodated by repositories with no cost at all. Therefore, we do not find cost to be a barrier for deposit. One possible barrier is that in general the submission process is cumbersome, something that might improve as new workflows are developed (as mentioned in the final conclusions of the manuscript).</p> <p>"8. A recommendation that is provided earlier in the paper is the call for lineage-specific single copy ortholog sets (Line 228). Should this be re-stated in the final recommendations as well?"</p> <p>The determination of a single copy ortholog set for Medusozoa would depend on the availability of gene annotations for several species, the completeness of these annotations, or availability of sufficient information enabling re-annotation of these genomes. We believe this might not be possible yet in Medusozoa, therefore this topic was restated together with suggestion #5 (starting on line 480).</p> <p>"Minor Comments:"<br/> "9. Line 31-33: This sentence seems to be constructed of two thoughts but missing a connector between them."</p> <p>This error was corrected as follows in the abstract:</p> <p>Modern genomic DNA sequencing in this group started in 2010 with the publishing of the Hydra vulgaris genome "and" has experienced an exponential increase in the past three years.</p> <p>"The following corrections were also done:"<br/> "Line 98: ... assembly statistics using the statswrapper.sh script ..."<br/> "Line 169: ... [55], and the ..."<br/> "Line 315: Remove "of" between reusing and previously."<br/> "Line 337: "reran" should be "rerun"."<br/> "Line 389: Typo, "projects""</p> <p>"10. Figures: The resolution of the figures provided made it difficult to review. Specifically Figure 3 was quite pixelated."</p> <p>The figures are concordant with the journal's requirements. The low quality of figures might be due to compression before the journal sent them to the reviewers. High quality versions of each version can be downloaded from the link available next to the figures in the pdf or svg files in Supplementary file S9. Leaving aside, Figure 2 and 3 (now re-numbered as Figure 3 and 4) were corrected to improve visualization; font size was increased and graph legend was repositioned.</p> |
| <b>Additional Information:</b>                                                                                                                                                                                                                                                                                                                    |                                                                                                                                                                                                                                                                                                                                                                                                                                                                                                                                                                                                                                                                                                                                                                                                                                                                                                                                                                                                                                                                                                                                                                                                                                                                                                                                                                                                                                                                                                                                                                                                                                                                                                                                                                                                                                                                                                                                                                                                                                                                                                                                                                                                                                                                                                                                                                                                                                            |
| <b>Question</b>                                                                                                                                                                                                                                                                                                                                   | <b>Response</b>                                                                                                                                                                                                                                                                                                                                                                                                                                                                                                                                                                                                                                                                                                                                                                                                                                                                                                                                                                                                                                                                                                                                                                                                                                                                                                                                                                                                                                                                                                                                                                                                                                                                                                                                                                                                                                                                                                                                                                                                                                                                                                                                                                                                                                                                                                                                                                                                                            |
| Are you submitting this manuscript to a special series or article collection?                                                                                                                                                                                                                                                                     | No                                                                                                                                                                                                                                                                                                                                                                                                                                                                                                                                                                                                                                                                                                                                                                                                                                                                                                                                                                                                                                                                                                                                                                                                                                                                                                                                                                                                                                                                                                                                                                                                                                                                                                                                                                                                                                                                                                                                                                                                                                                                                                                                                                                                                                                                                                                                                                                                                                         |
| <b>Experimental design and statistics</b><br><br>Full details of the experimental design and statistical methods used should be given in the Methods section, as detailed in our <a href="#">Minimum Standards Reporting Checklist</a> . Information essential to interpreting the data presented should be made available in the figure legends. | Yes                                                                                                                                                                                                                                                                                                                                                                                                                                                                                                                                                                                                                                                                                                                                                                                                                                                                                                                                                                                                                                                                                                                                                                                                                                                                                                                                                                                                                                                                                                                                                                                                                                                                                                                                                                                                                                                                                                                                                                                                                                                                                                                                                                                                                                                                                                                                                                                                                                        |

|                                                                                                                                                                                                                                                                                                                                                                                                                                                                                                                                                         |            |
|---------------------------------------------------------------------------------------------------------------------------------------------------------------------------------------------------------------------------------------------------------------------------------------------------------------------------------------------------------------------------------------------------------------------------------------------------------------------------------------------------------------------------------------------------------|------------|
| <p>Have you included all the information requested in your manuscript?</p>                                                                                                                                                                                                                                                                                                                                                                                                                                                                              |            |
| <p><b>Resources</b></p> <p>A description of all resources used, including antibodies, cell lines, animals and software tools, with enough information to allow them to be uniquely identified, should be included in the Methods section. Authors are strongly encouraged to cite <a href="#">Research Resource Identifiers</a> (RRIDs) for antibodies, model organisms and tools, where possible.</p> <p>Have you included the information requested as detailed in our <a href="#">Minimum Standards Reporting Checklist</a>?</p>                     | <p>Yes</p> |
| <p><b>Availability of data and materials</b></p> <p>All datasets and code on which the conclusions of the paper rely must be either included in your submission or deposited in <a href="#">publicly available repositories</a> (where available and ethically appropriate), referencing such data using a unique identifier in the references and in the “Availability of Data and Materials” section of your manuscript.</p> <p>Have you have met the above requirement as detailed in our <a href="#">Minimum Standards Reporting Checklist</a>?</p> | <p>Yes</p> |

1 **The state of Medusozoa genomics: current evidence and future challenges**

2 Santander, Mylena D. 1 ORCID 0000-0001-6750-4180

3 Maronna, Maximiliano M. 2 ORCID 0000-0002-2590-639X

4 Ryan, Joseph F. 3,4 ORCID 0000-0001-5478-0522

5 Andrade, Sônia CS. 1 ORCID 0000-0002-1302-5261

6

7 **Affiliation**

8 1. Departamento de Genética e Biologia Evolutiva, Instituto de Biociências, Universidade  
9 São Paulo, 277 Rua do Matão, Cidade Universitária, São Paulo, Brazil. ZIP CODE  
10 05508-090.

11 2. Departamento de Zoologia, Instituto de Biociências, Universidade de São Paulo, São  
12 Paulo, 101 Rua do Matão Cidade Universitária, São Paulo, Brazil. ZIP CODE 05508-  
13 090.

14 3. Whitney Laboratory for Marine Bioscience, University of Florida, 9505 Ocean Shore  
15 Blvd, St. Augustine, Florida, 32080, USA

16 4. Department of Biology, University of Florida, 220 Bartram Hall, Gainesville, FL, 32611,  
17 USA

18 Corresponding authors: MDS [mylena.santander@gmail.com](mailto:mylena.santander@gmail.com), MMM  
19 [maxmaronna@gmail.com](mailto:maxmaronna@gmail.com)

20

21

22

23

24

25 **Abstract**

26 Medusozoa is a widely distributed ancient lineage that harbors one-third of Cnidaria diversity  
27 divided into four classes. This clade is characterized by the succession of stages and modes  
28 of reproduction during metagenic lifecycles, and includes some of the most plastic body plans  
29 and life cycles among animals. The characterization of traditional genomic features, such as  
30 chromosome numbers and genome sizes, was rather overlooked in Medusozoa and many  
31 evolutionary questions still remain unanswered. Modern genomic DNA sequencing in this  
32 group started in 2010 with the publishing of the *Hydra vulgaris* genome and has experienced  
33 an exponential increase in the past three years. Therefore, an update of the state of  
34 Medusozoa genomics is warranted. We reviewed different sources of evidence, including  
35 cytogenetic records and high-throughput sequencing (HTS) projects. We focused on four main  
36 topics that would be relevant for the broad Cnidaria research community: 1) taxonomic  
37 coverage of genomic information; 2) continuity, quality and completeness of HTS datasets; 3)  
38 overview of the Medusozoa specific research questions approached with genomics; and 4)  
39 the accessibility of data and metadata. We highlight a lack of standardization in genomic  
40 projects and their reports, and reinforce a series of recommendations to enhance future  
41 collaborative research.

42

43 **Keywords**

44 Annotation, completeness, assembly, genome size, chromosome number, collaborative  
45 genomics

46

47

48

49

50



## 51 **Background**

52 Medusozoa subphylum includes nearly 4,055 species of invertebrates distributed in  
53 the classes Hydrozoa, Cubozoa, Staurozoa and Scyphozoa [1], which are found at all latitudes  
54 in almost all aquatic environments, from freshwater to marine, and from shallow to deep waters  
55 (Figure 1). Medusozoa species, together with the other cnidarians classes (i.e. Anthozoa and  
56 Endocnidozoa), harbor some of the most plastic life cycles and diverse body plans among  
57 animals [2], and represent one of its early diverging groups, with all major cnidarian lineages  
58 already present 500 million years ago [3].

59 The Medusozoa clade is characterized by different evolutionary novelties, such as the  
60 presence of linear mitochondria and the adult pelagic stage, also known as medusa or jellyfish  
61 [4–6]. Most medusozoan life-cycles are characterized by the succession of different stages,  
62 including a larval, benthic asexually reproducing polyp stage, and a sexually reproducing  
63 jellyfish stage [6,7]. This ancestral metagenic life-cycle pattern is highly plastic and in some  
64 groups has been extensively modified or even lost. For example, several lineages have lost  
65 the pelagic medusae or reduced it to a reproductive structure, or acquired colonial lifestyles  
66 during the benthic phase [8–10]. Other novel traits have emerged in Medusozoa such as  
67 complex body patterns, neuromuscular systems and sensory organs [11].

68 The history of Medusozoa genomics started with pioneer cytogenetics reports (e.g.  
69 [12,13]) and was followed later by genome size estimations [14,15]. Over the past 20 years,  
70 technological advances and cost reduction of genome-scale sequencing platforms have led  
71 to a steady increase in both number and diversity of sequenced genomes and transcriptomes  
72 [16,17]. Medusozoa is not an exception, as numerous genomic resources have become  
73 available for model and non-model species, especially in the last 3 years. This advance has  
74 enabled the study of the genetic basis of many Medusozoa novel traits (e.g. [18–22]). Previous  
75 reviews about cnidaria genomics have focused on the small number of species with  
76 sequenced genomes available at the time [11,23,24], on individual cnidarian lineages (i.e.

77 Myxozoa; [25]), or on specific topics such as toxins or evolution of novel traits [11,26]. Given  
78 the increasing amount of genomic information available, an update of the state of Medusozoa  
79 genomics is warranted.

80 Here, we provide a comprehensive review of the major advances in Medusozoa  
81 genomics over the past century. In order to shed light in the understanding of the genomic  
82 evolution of the group from high throughput sequencing (HTS) datasets, we report the main  
83 trends on the number and quality of available genome projects, taking into account basic  
84 information of sequencing datasets, genome assemblies, genome annotations, and  
85 accessibility of associated data and metadata.

86

## 87 **Main text**

### 88 **1. Methods**

89 We surveyed literature and databases for cytogenetic reports and genome size  
90 estimations. Our main source of genomic information and metadata was NCBI Genome  
91 (Assembly, Genomes, Nucleotide, Taxonomy and SRA; [27]). We retrieved data automatically  
92 using entrez-direct v.13.9 and NCBI datasets v. 12.12. For information not present in NCBI,  
93 we checked published articles for proper information collection, as well as personal  
94 repositories mentioned in the associated articles. Due to recent updates in taxonomic  
95 statuses, we modified the attribution of karyotypes, genome sizes and assemblies of several  
96 species (see main text and Supplementary Materials).

97 Because there have been subtle variations in metrics and statistics between most  
98 genome reports, we recalculated some statistics, allowing us to make meaningful  
99 comparisons. Briefly, we have generated the following: i) assembly statistics using the  
100 statswrapper.sh script from BBmap (v38.73; RRID:SCR\_016965; [28]); ii) gene statistics from  
101 the original annotation files with AGAT (v0.6.0; [29]) and assessment of completeness of all  
102 assemblies using BUSCO (v5.0.0+galaxy0; RRID:SCR\_015008; [30]) in genome mode and

103 Metaeuk software, using two Single Orthologs Databases (eukaryota\_odb10, number of  
104 genes=255, number of species=70; metazoa\_odb10, number of genes=954, number of  
105 species=65), available at the public Galaxy server [31,32].

106 Assembly quality was reported following the metric proposed by Earth Biogenome  
107 Project [33] (hereafter BGP-metric). This system avoids the use of ambiguous terminology for  
108 quality and uses a logarithmic scale where the first two numbers are the exponents of the N50  
109 contig and scaffold (1: 0-99Kb; 2: 1-9.9Mb; 3: 10-99.9Mbp), and the third number corresponds  
110 to the level of chromosomal assembly (1: 90% DNA > assigned to chromosomes in silico; 2:  
111 chromosomal rearrangements validated by two data sources; 3: >80% DNA assigned to intra-  
112 species maps and experimental validation of all breakpoints; see [33]).

113 All graphs were generated using Python v.3 with ETE Toolkit v.3 [34], Matplotlib v3.3.1  
114 [35] and Seaborn v.0.11 [36] and modified with Inkscape v.0.92 [37], to improve visualization  
115 (e.g. font size and spacing). The tree of figures 1 and 3 represent a simplified phylogenetic  
116 hypothesis obtained by combining phylogenies from previous studies (Scyphozoa [38],  
117 Medusozoa [5], Hydrozoa [39,40]), taking into account clades with high congruence and  
118 support values. Although the different phylogenetic hypotheses were mostly congruent, no  
119 single study nor molecular dataset comprised all the terminals discussed here. We manually  
120 compiled all genomic information and HTS metadata referenced in this review using a report  
121 model based on previous works and public databases such as NCBI (Supplementary file S1;  
122 [29,41,42]). The command line used for retrieving genetic information and metadata, for  
123 statistics calculation and the code used for graph generation are available at Supplementary  
124 file S2 and S3. All collected data was updated until May 1st 2021.

## 125 **2. Genomic projects: whos and hows of Medusozoa**

126 Chromosome numbers are known for 34 hydrozoan species and 5 scyphozoan,  
127 including 3 lineages of the *Aurelia aurita* sp. complex species ([12,13,21,43–51];  
128 Supplementary file S4). Older chromosome descriptions for 25 species do not include

129 information about chromosome morphology and often lack photographic records or schematic  
130 representations [12,13,43–47].

131         Genome size, a fundamental feature in genome sequencing project, has been  
132 experimentally estimated by Flow Cytometry or Feulgen Densitometry techniques, for 24  
133 medusozoan species (Scyphozoa: 7 spp.; Cubozoa: 1 spp.; Hydrozoa: 16 spp.; Supplementary  
134 file S4). Genome sizes are highly variable ranging from 254 Megabases (Mbp) to 3,481.68  
135 Mbp in *Sanderia malayensis* (Scyphozoa) and in *Agalma elegans* (Hydrozoa), respectively  
136 [15]. Moreover, an additional 12 genome size estimates are available when considering k-  
137 mer-based computational assessments, increasing the number of species with genome size  
138 information to 30, and including two cubozoans (913-2,673Mbp) and one staurozoan (230  
139 Mbp) (Supplementary file S1; Supplementary file S4). These estimates are considered less  
140 accurate, especially for genomes with high heterozygosity, high repetitive content and large  
141 genome size [52]. In fact, kmer based and experimental estimations from the same species  
142 differed by 13-33%.

143         A total of 34 HTS projects were identified. Of these, 32 had sequencing reads  
144 accessible through the NCBI-SRA database but not all of them were associated with a genome  
145 assembly (Table 1; Supplementary file S1). The taxonomic coverage of the assemblies  
146 encompassed 7 of the 13 Medusozoa orders, and represented at least one species per class  
147 (Figure 2): 28 assemblies were accessible for 21 species, representing 0.5 % of Medusozoa  
148 (Figure 2; Table 1; Supplementary file S1). Of these 21 species, 12 were Scyphozoa, 4 were  
149 Hydrozoa, 4 were Cubozoa, and one was Staurozoa. Scyphozoa had the highest number of  
150 sequenced families (4 of 22), of which Pelagiidae contained the highest number of sequenced  
151 species so far (5 spp.), followed by Ulmaridae, Rhizostomatidae and Cassiopeiidae with 2  
152 spp. each (Figure 2), all belonging to subclass Discomedusae (none from Coronamedusae).  
153 The remaining assemblies represent three of the eight Cubozoa families and three of 135  
154 Hydrozoan families (Figure 2). In addition to the small fraction of family representation in the

155 hydrozoan genomes, the underrepresentation of Leptothecata is particularly unfavorable as it  
156 harbors more than half of Medusozoa species (2,059 sp; [1]).

157 -----TABLE 1 SHOULD BE LOCATED HERE-----

158 Much of the assembly effort is biased towards a small number of species. For example,  
159 three species of Hydrozoa and Scyphozoa presented two assemblies each, of which *Hydra*  
160 *viridissima* and *Rhopilema esculentum* were sequenced twice independently, meanwhile  
161 *Chrysoaora quinquecirrha* presents two versions of the same assembly. Moreover, three  
162 assemblies were available for two different strains of *Hydra vulgaris* (former *Hydra*  
163 *magnipapillata*), one of them published as an update of the reference genome called Hydra  
164 2.0. In *Aurelia*, the genomes of three different lineages were sequenced and assembled: Baltic  
165 sea, Roscoff and *Aurelia* sp1. strains [19,20]. Based on a recent taxonomic update of this  
166 genus [53], locality and genetic information described in the original articles [19,20], we  
167 decided to refer to these genomic datasets as: Baltic sea strain = *Aurelia aurita*; Roscoff strain  
168 and *Aurelia* sp1. strains = *Aurelia coerulea*.

169 Most of the assemblies were deposited in NCBI Assembly database, one was only  
170 found in a journal-specific database (i.e. GigaDB [54]), one assembly was only in a personal  
171 repository (Google Drive) and one in the National Human Genome Research Institute site [55].  
172 Some assemblies were additionally deposited in Institute-centered repositories such as OIST  
173 Marine Genomics Unit [56], and the Marine Invertebrate Models Database (MARIMBA, [57]).  
174 A significant portion of the publicly available assemblies (total of 8, ~30%) are not yet  
175 associated with a formal publication and belong to the IRIDIAN GENOMES project [58]. The  
176 most frequent sequencing technology was Illumina (26 assemblies, ~93%), but leaving aside  
177 unpublished ones, most works include a combination of different sequencing techniques,  
178 library sizes and platforms (i.e Sanger, 454, Illumina, long reads, linked-reads and Hi-C  
179 sequencing; Supplementary file S1).

180 Almost all medusozoan genome assemblies were at draft contig or scaffold level, with  
181 one exception, *Rhopilema esculentum*, where chromosome-level scale assembly was  
182 reported [59]. The total length, contig and scaffold number, N50, and GC% varied across  
183 species and classes (Figure 3A; references in Supplementary file S5). The assembly  
184 continuity and quality was higher in Scyphozoa than in the other classes, as observed by the  
185 distribution of contig and scaffold N50 (Figure 3A) and the BGP-metric for assembly quality  
186 (Figure 3A). In general, they are fragmented (75%), and have contig N50 of less than 40 Kbp  
187 (Figure 3A; BGP-metric values of 0.0.0, 0.1.0 and 0.2.0). Staurozoa, Cubozoa and Scyphozoa  
188 assemblies have similar percentages of base composition, around 35% to 43% GC.  
189 Consistent with previous reports [60], Hydrozoa genomes have a higher dispersion of GC%,  
190 with the GC values of five assemblies below 35%.

191 In relation to gene content (Figure 3B), 17 genomes were annotated using at least one  
192 source of information (Supplementary file S1) and their total number of genes or total number  
193 of protein-coding genes were reported. Further description of coding information was variable  
194 among works and as more detailed information was considered, the number of genomes with  
195 reported information decreased. Annotation tracks and gene models were available for only  
196 11 of the 17 datasets. Recalculations of gene features together with the information recovered  
197 from original articles, allowed us to analyze the distribution of 5 different features in 15  
198 genomes of Scyphozoa, Hydrozoa and Cubozoa (Figure 3B; Box): Number of genes (n=15),  
199 Mean exons per cds (n=10), Mean gene length (n=11), Mean exon length (n=11), Mean intron  
200 length (n=12). For three species, *Cassiopea xamachana* (Scyphozoa; 31,459), *Alatina alata*  
201 (Cubozoa; 66,156) and *Calvadosia cruxmelitensis* (Staurozoa; 26,258), the available  
202 information was restricted to the number of predicted genes. Some small inconsistencies were  
203 detected between original data reported in some papers and our recalculations (Table S5-6),  
204 and others between data reported in the main text and supplementary materials of some  
205 papers.

206 The determination of repetitive DNA has been an integral step before gene annotation in most  
207 genomic projects. Frequently, repeat diversity was not properly reported and the degree of



208 detail also varied between articles: e.g. some published works only referred to the most  
209 abundant class of repetitive DNA, meanwhile others described only results at class or family  
210 level. Repetitive libraries —consensus sequences representing repeat families— were not  
211 properly saved in repositories with the exception of two independent articles, and  
212 RepeatMasker results were reported in 4 articles (one reporting only classified repeats). Total  
213 repetitive length of 12 species for which coding information was also available is presented in  
214 Figure 3B and discussed in Box.

215         The degree of completeness of these datasets also varied substantially, as estimated  
216 by BUSCO (metazoa\_odb10 and eukaryota\_odb10; Figure 4). While all Eukaryota genes were  
217 present in at least one assembly (Supplementary file S5, Supplementary file S6), the level of  
218 absence and fragmentation of Metazoa genes was higher (Figure 4. Supplementary file S5).  
219 Seven Metazoa genes were absent in all assemblies and 17 were absent in more than 20%  
220 of them (Figure 4, indicated in red). Some Metazoa BUSCO genes were absent in lineages  
221 with the higher number of assemblies, such as Scyphozoa and Hydrozoa (Figure 4. indicated  
222 in yellow rectangles; Supplementary file S5). This condition was suggested by [20], after  
223 detecting the absence of 14 genes in 5 species (version metazoa\_o9db), 3 of which coincided  
224 with the genes detected as absent here (Orthodb IDs: 460044at33208, 601886at33208,  
225 114954at33208), one of which (445034at33208) that has a patchy distribution in Medusozoa  
226 and 9 of which were removed in later versions of the database (Figure 4 in bold).

227         Moreover, 27 genes were simultaneously recovered as undetectable or fragmented in  
228 more than 80% of the assemblies (Supplementary file S5 table S7). Based on BUSCO  
229 completeness assessment with metazoa\_o10db, 13 assemblies present 90-95% of genes  
230 (fragmented+complete), while only one assembly includes over 90% of complete genes; the  
231 remaining 15 assemblies present between 57-87% of genes (complete+fragmented) or 16-  
232 77% complete genes. While the Metazoa database might include genes that are absent,  
233 fragmented, or have non-conventional features in all medusozoa species, the utility of the  
234 Eukaryota database in the completeness assessment is limited by its low number of genes.

235 Until more specific databases are developed, the combination of both BUSCO databases  
236 should be used taking into account their limitations.

237 Differences in sequencing strategy and platforms are expected to be linked with  
238 assembly quality, both in terms of continuity and completeness. For example, hybrid  
239 sequencing plus optical maps and combined evidence-based annotation should generate  
240 better results than a short-read sequencing and single-evidence annotation [61,62]. Although  
241 this general trend was observed in this review, with most Illumina-only datasets showing lower  
242 BGP-metric (Figure 3) and lower completeness (Figure 4), it is not a granted condition. Some  
243 punctual cases can exemplify biological and methodological issues that impose limitations to  
244 genome sequencing and assembly: e.g. the difficulty in obtaining chromosome-scale  
245 assemblies despite small genome sizes and combined sequencing strategies (Hi-C + short  
246 reads+ long reads) [63,64] or the difficulty in extracting high-molecular-weight DNA [20].  
247 Because of the heterogeneity of Medusozoa genomic projects in terms of time periods,  
248 objectives, methods and resources, a proper quantitative analysis of the relationship between  
249 methods and outcome quality would not be feasible, and we prefer to refer to articles  
250 specialized in assessing methods (e.g. [61,62]).

### 251 **3. The state of Medusozoa genomics: inner and derived knowledge**

252 The first glimpse of the Medusozoa genomic organization was obtained by cytogenetic  
253 studies [12,13,21,43–51], but in contrast to other animals, the available information is still  
254 sparse. Many cytogenetic questions essential to the understanding of genome evolution are  
255 unanswered in Medusozoa, either at species or population scale, including the distribution of  
256 the chromosome number ( $2n$ ), fundamental number of chromosome arms (FN), genome size,  
257 ploidy level, heterochromatin content. These are questions that have gained renewed interest  
258 since the arrival of the genomic era.

259 Regarding the phylogenetic distribution of the chromosome number, no inferences can  
260 yet be made on the sparse available information, apart from the presence of some

261 chromosome variation throughout Medusozoa. A special case was reported in *Hydra* where,  
262 according to recent descriptions, many species shared a  $2n=30$  karyotype with metacentric or  
263 submetacentric chromosomes ([51]; Supplementary file S4). This suggests that the  $2n=30$   
264 karyotype could be widely distributed in the genus and even in other Hydrozoa groups, since  
265 it was also described for one species of Hydrocorynidae, Hydractiniidae, Campanulariidae,  
266 Bougainvilliidae, and Clytiidae, and 3 Eirenidae (Supplementary file S4; references therein).  
267 Interestingly, in Anthozoa, a few sea anemones and several scleractinian corals have  
268 karyotypes between  $2n=28$  and  $2n=30$  [65–67]. Nevertheless, a higher sampling effort should  
269 be conducted in order to test the extent of this apparent karyotype stability.

270         Scyphozoa genomes tend to be smaller (~250 to ~700 Mbp) than those of Hydrozoa,  
271 which encompass a larger range (~380 to ~3,500 Mbp) (Figure 2; Supplementary file S4,  
272 references therein), but due to the scarcity of estimations that represent around 1% of the  
273 subphylum, these ranges should be considered preliminary. The evolution of eukaryotic  
274 genome size is a long-standing question that has been called the “C-value Enigma” [41]. This  
275 name stems from the difficulty elucidating the evolutionary forces (e.g. drift and natural  
276 selection) that have given rise and serve to maintain variations in genome size, the  
277 mechanisms of genome size change, and the consequences of these variations at an  
278 organismal level [41]. Several conflicting hypotheses have been postulated to explain this  
279 puzzle with most having experimental support in some but not all lineages (reviewed in [68]).  
280 The molecular basis of these variations in Medusozoa have only been studied in detail for  
281 *Hydra* [69] and for *S. malayensis* [63]; their trends have been related to repetitive DNA and  
282 gene length respectively (Box). Meanwhile, the ecological and historical factors underlying  
283 genome size diversity and its extent in Medusozoa, are topics that remain to be elucidated.

284

**Box. Genome content**

**Gene content and length:** it is straightforward to imagine that the evolution of these two characteristics have potential impacts in macroevolution of organisms. The distribution of gene number in Medusozoa (Figure 3B) ranged from 17,219 in the Scyphozoon *Rhopilema esculentum* [59] to 66,156 in the Cubozoon *Alatina alata* [22], but most species of all classes have gene counts near the median (26,258), which is higher than the range ( $18,943 \pm 451.82$ ) described for animals [41]. The upper limit described in the highly fragmented *A. alata* genome deviates from the observed in *Morbakka virulenta* (24,278 genes), the only other sequenced Cubomedusae [20,22]. Species with varying genome sizes of Hydrozoa, Scyphozoa and *M. virulenta* (Cubozoa) had similar mean CDS lengths (1,414, 1,214, 1,387 base pairs), mean numbers of exons per gene (5, 6, 5.4), mean exon lengths (306, 293, 432 bp), but had different gene lengths (9,530, 7,855 and 21,444 bp respectively) due to the presence of longer introns in Hydrozoa and Cubozoa when compared to Scyphozoa (Hydrozoa: 1,600; Cubozoa: 3,705 vs. 1,146 bp in Scyphozoa). This is best exemplified in the genome of the scyphozoon *S. malayensis*, which has the smallest cnidarian genome reported to date [63], and has also the smallest introns of any sequenced medusozoan genome (Figure 3B. yellow arrowhead). Nevertheless, these ranges are rough estimates and sometimes heterogeneous, e.g. resulting from different filtering parameters, and their implications should be tested as new assemblies and annotations become available.

**Repetitive content:** repetitive DNA represents a significant part of eukaryotic genomes and is highly diverse, composed by different kinds of transposable elements (TEs), tandem repeats and multigene families (e.g. rRNA and tRNA). Many of these sequences, especially TEs and satellite DNA, were initially considered as an expendable sector of the genome, although their impact on genomic evolution has since been recognized (reviewed in [70]). For example, fusion between TEs and host genes have occurred multiple times in vertebrates and have contributed to the evolution of novel features [71]. Likewise, TEs and other repetitive DNA have been associated with genomic rearrangements and changes in

DNA content (e.g. [69,70]). The *Hydra* genus, which has been more extensively studied from this point of view, has experienced a rapid genomic evolutionary rate and presents a 3-fold genome size increase resulting from the amplification of a single LINE family [69]. Moreover, *Hydra* genomes include an over-representation of transposase-related domains [72]. It is interesting to note that many of the Medusozoa species studied so far have relatively small genomes but unusually high proportions of repetitive DNA [20,63,73,74]. Nevertheless, the lack of standardization in the description of its diversity, and the discrepancy in the degree of detail in which these have been described, limits the potential to make inferences. Repetitive DNA is a complex study subject, limited by assembly continuity and annotation effort, but restricting genomic studies to the “functional” part of the genome (sensu [75]) may lead us to a narrowed view of the Medusozoa genome evolution.

285           Modern Medusozoa genomics formally started with the sequencing and publication of  
286 *Hydra vulgaris* genome that in cnidaria was only preceded by *Nematostella vectensis* [65,76].  
287 *Hydra vulgaris* is one of the earliest models in biology, mainly used for the study of  
288 development, regeneration, and more recently, of aging (reviewed in [77,78]). The study of  
289 these two early genomes was fundamental for the reconstruction of a more complex ancient  
290 eumetazoan genome than first suggested by the comparison of vertebrates and insects  
291 [16,23,65,76].

292           Unlike most other medusozoan species, *Hydra* lives in freshwater, lacks a medusa and  
293 has a genome that has experienced a very rapid rate of evolution [21]. It therefore is not the  
294 ideal species for reconstructing historical nodes on the Medusozoa tree of life. As such, more  
295 recent medusozoa genomes have led to important updates in our understanding of  
296 Medusozoa-relevant research topics, including phylogenetic reconstructions, the genetic  
297 basis of the medusae, the evolution of symbiosis, toxin characterization, Homeobox gene  
298 evolution, to name a few examples (Table 1). Nevertheless, Medusozoa genomes include

299 thousands of single-copy genes and repetitive elements; however, only a very limited number  
300 of them have been analyzed in detail.

301         The complex nature of Medusozoa venom has been investigated by a number of  
302 transcriptomic, proteomic and genomic studies (reviewed in [26]). Several putative toxin genes  
303 and domains have been identified, covering a significant part of the wide range of known toxins  
304 [20,22,59,73]. In Scyphozoa, toxin-like genes were often recovered as multicopy sets [20,59].  
305 Moreover, in *R. esculentum* toxin-like genes were also tandemly arranged and several of them  
306 were located nearby in chromosome 7, suggesting that the observed organization might  
307 influence toxin co-expression[59]. Minicollagens, which are major components of  
308 nematocysts, also had a clustered organization and a pattern of co-expression in *Aurelia* [20].  
309 These examples add to various clustered genes described in Cubozoa, Hydrozoa and  
310 Anthozoa, and would indicate that gene clustering and operon-like expression of toxin genes  
311 is widespread in Cnidaria ([20] and references therein).

312         The determination of lineage specific genes and increases and decreases of gene  
313 content is one of the recurrent questions found in Medusozoa genomic studies (e.g. [20,21]),  
314 and it has been conducted using different methodologies and sets of species. Recent evidence  
315 proved that the detection of lineage-specific genes, and other analyses relying on accurate  
316 annotation and orthology prediction, can be significantly biased by methodological artifacts  
317 [79–83]; several problems have been identified, such as low taxon sampling, heterogeneous  
318 gene predictions, and failure of detecting distant homology and fast-evolving orthologues.  
319 These considerations are highly relevant in Medusozoa, as comparisons are often made, by  
320 necessity, with distantly related species (e.g. Anthozoa has been estimated to have diverged  
321 from Medusozoa around 800 million years ago [84]). In Cnidaria, It has been estimated the  
322 most elevated rates of loss in the hydrozoan branch leading to *Clytia hemisphaerica* and *Hydra*  
323 [21,76], followed by slightly lower rates of gene loss in Scyphozoa and substantially lower  
324 rates in Anthozoa [19]. Gene families that have experienced expansion and contraction have  
325 been studied in relation to complex life cycle patterns [19,21], simplification of the body plan



326 [72,76], the evolution of symbiosis [72], among others (table 1). Expression patterns of  
327 identified taxonomically restricted medusozoan genes have been mainly studied in the context  
328 of life cycle stages (e.g. [20,21]).

329         The complex life cycle of Medusozoa has resulted from the combination of both  
330 ancestral and novel features. *Aurelia*, *Morbakka virulenta* and *Clytia hemisphaerica* have  
331 significantly different patterns of gene expression across stages and during transitions [19–  
332 21]. Differentially expressed genes include many conserved ancestral families of transcription  
333 factors [19–21]; there is also a considerable amount of the putative lineage-restricted genes  
334 that show differential expression in the adult stages [20,21]. A few of these “novel”  
335 medusozoan genes have been described, such as novel myosin-tail proteins that are absent  
336 from Anthozoa and represent markers of the medusae striated muscles [20]. It was suggested  
337 that the evolution of the Medusozoa complex life cycle would therefore have involved the  
338 rewiring of regulatory pathways of ancestral genes and the contribution of new ones [19–21].  
339 As such, the body plan and life cycle simplifications observed in *Clytia* and *Hydra*, respectively,  
340 would be the result of loss of transcription factors involved in their development [21]. Finally,  
341 the significance of many of the putative Medusozoa and species-specific genes remain to be  
342 elucidated.

343         On the other hand, synteny was also analyzed several times, including species of  
344 Hydrozoa, Cubozoa and Scyphozoa, and were carried on at different scales depending on  
345 assembly continuity (i.e. microsynteny and macrosynteny), and often comparing the focus  
346 species to species from sister clade Anthozoa [19–21,67,76]. High synteny conservation was  
347 found within Anthozoa (*N. vectensis* vs. *Scolanthus callimorphus* [65–67]) and within  
348 Hydrozoa (*H. vulgaris* vs. *C. hemisphaerica*; [21]). Meanwhile, conservation of synteny at a  
349 lesser degree was also observed between Anthozoa and Scyphozoa (*N. vectensis* vs. *R.*  
350 *esculentum*; *N. vectensis* vs. *Aurelia* strains; [19,20,67]) and only a few shared syntenic blocks  
351 between Hydrozoa and Anthozoa (*H. vulgaris* vs. *N. vectensis*; [21,67,76]), Hydrozoa and  
352 Scyphozoa (*H. vulgaris* vs. *Aurelia aurita*; [19]) and Scyphozoa and Cubozoa (*A. aurita* vs. *M.*

353 *virulenta*; [20]). It is particularly interesting to note that *H. vulgaris*, *N. vectensis* and *S.*  
354 *callimorphus* present  $2n=30$ , but shared fewer syntenic blocks than either of the two  
355 anthozoans with *R. esculentum*, which has a different karyotype ( $2n=22$ ) [67] (non peer-  
356 reviewed). These results suggest that there is evidence for the conservation of an ancient  
357 genome architecture in Anthozoa and Scyphozoa, but less conservation in Hydrozoa and  
358 Cubozoa, coincident with a more rapid rate of genome reorganization in the last two classes  
359 [21,67].

#### 360 **4. Prospects on genomic data and general resources**

361 The increasing amount of genomic information available for diverse organisms has  
362 enabled statistical inferences of trends in eukaryotic genomic evolution. Examples of such  
363 studies are available at small and large phylogenetic scales and have enabled evolutionary  
364 analyses of the distribution of gene numbers, gene features (e.g. intron size), and repetitive  
365 content (e.g. [41]). Nevertheless, the power of eukaryotic genomic comparative analyses is  
366 hindered by a lack of data and metadata standardization [41,85], which is especially evident  
367 in Medusozoa.

368 There is much to learn from decades-old references of cytogenetic studies, but some  
369 studies, especially older ones, lack complete material and methods (e.g. pretreatment,  
370 references, designs and photographs; general metadata as locality, taxonomic identification)  
371 and therefore should be considered carefully in a comparative framework (e.g. [86]).

372 Similar problems can be expected in relation to genomic data, as metadata is often not  
373 specified in great detail. We analyzed hundreds of fields including genetic information and  
374 metadata (methods, metrics and registry codes; table Supplementary file S1), of which no  
375 dataset presents most of them, whatever the area or section (e.g. processing area, section  
376 trimming). This could be a future problem because reusing previously published datasets is  
377 becoming routine, and tracking of information (BioProjects, Biosamples, methodologies,  
378 filtering parameters, etc.) would be misleading [85,87].

379 Descriptions of bioinformatic methods in genome studies are often even less  
380 comprehensive than database metadata. For example, we identified at least three  
381 independent projects, each of which applied different criteria for gene model filtering, and  
382 another three articles applied slightly different criteria for repeat library filtering  
383 (Supplementary file S1). Although differences at this stage can seem small on the surface,  
384 they can result in hard-to-detect biases downstream that can lead to flawed biological  
385 conclusions. For example, resistance genes have been underestimated in some flowering  
386 plant genomes due to inconsistencies of genome annotation stemming from differences in  
387 repeat masking [88]. Likewise, in the current review, we identify discrepancies in BUSCO  
388 genome completeness comparisons that are caused by differences in database versions,  
389 which are frequently unspecified in the associated articles.

390 An alternative solution for comprehensive comparative analyses is to (re)annotate all  
391 genomes with the same pipeline, a task that is laborious and time consuming. Some programs  
392 were designed for achieving this task simultaneously in many related species (e.g. [89,90]).  
393 Another alternative is to use specific software developed to improve genome annotations by  
394 leveraging data from multiple species (e.g. [91,92]) or targeting specific gene families [93,94].  
395 Finally, differences in annotation due to methodological artifacts can be accommodated in  
396 comparative analysis if considered as a variable in the statistical tests (e.g. comparing tRNA  
397 genes in high and low quality avian genomes [95]).

398 The submission of raw sequencing data and fundamental metadata to the NCBI-SRA  
399 or EMBL-ENA remains a vital step in ensuring the usability and transparency of genome data  
400 [96,97]. Also, project centric repositories serve to store assemblies and associated datasets,  
401 and enable comparative studies by basic tools. Taxon-restricted databases including cnidarian  
402 data have been employed in the past, but these are often not maintained due to lack of upkeep  
403 funding and other factors (e.g. [98,99]). In addition, submission to the large databases like  
404 SRA and GenBank can lead to the automatic detection of specific issues such as

405 contamination or annotation errors that might otherwise not be detected. For these reasons,  
406 the large general databases should remain the primary repositories for sequence and  
407 metadata [100]. Nevertheless, this is not always the case. For example, the assembly with the  
408 highest continuity as estimated by the BGP-metric, corresponding to *R. esculentum* [59], is  
409 only found in a journal-specific database and lacks a stable identifier (e.g. NCBI accession).  
410 A similar situation is observed for one of *Hydra vulgaris* assemblies (Hydra 2.0) which is only  
411 found in a project-specific database [55].

412         There is a growing number of community-driven guidelines, standards, databases and  
413 resources based on the Findable, Accessible, Interoperable and Reusable principles (FAIR  
414 principles) for digital research outputs [100]. Furthermore, global initiatives of large-scale  
415 genome sequencing included in Earth Biogenome Project have adopted a set of standardized  
416 protocols for the different stages of the genome projects, such as specimen collection, DNA  
417 extraction, sequencing, assembly and annotation methods, and reporting, in order to generate  
418 datasets that could “be useful to the broadest possible scientific community” [33]. Standards  
419 should be also implemented by independent research groups publishing genomes. The main  
420 goal of standardization is to promote evaluation, discovery, and reuse of genomic information,  
421 providing long term benefits for science.

422         The following are suggestions to enhance genome projects and outcomes, and to  
423 promote open and collaborative research. These suggestions can be broadly applied to any  
424 genome project and are in line with those proposed by many initiatives and consortia (e.g.  
425 [33,100,101]). Nevertheless, it is worth reinforcing and discussing them in the context of this  
426 review since genome projects are more and more often being initiated in research laboratories  
427 that have historically been more focused on other aspects of medusozoan biology and may  
428 not be as familiar with these general practices:

429 1. *Deposit all data and metadata in public specialized databases (e.g. NCBI), at least once*  
430 *associated articles are accepted for publication. Provide comprehensive metadata, including*

431 *those not considered as priority for the aforementioned project.* Frequently, data and metadata  
432 that are described in the original articles or deposited in repositories are not submitted to public  
433 databases. Tracking information from multiple sources is time consuming and prone to error.  
434 Databases and repositories enable the improvement of metadata after the initial releases, by  
435 the addition of new or corrected information (e.g. publication information) from the authors.  
436 We believe that this kind of data curation would improve the state of Medusozoa genomics  
437 not only by enabling downstream analysis after the publication, but also enabling the detection  
438 of methodological options (e.g. tissue selection; sequencing technology) that would improve  
439 the quality of the results.

440 2. *Consider providing standardized genome statistics in an easily accessible format (e.g.*  
441 *Supplementary file S1 presented here).* Alternatively, use specialized tools that standardize  
442 reports for multiple samples and datasets (e.g. [42,102,103]). This will facilitate meta-  
443 analyses, prompt new genome studies to make accurate comparisons to previously published  
444 studies, and prevent the propagation of erroneous information.

445 3. *Deposit output results that were fundamental in any of the steps of the analysis (e.g. gene*  
446 *models, repetitive libraries and annotation tracks).* A Medusozoa-centric database with long-  
447 term maintenance is still lacking for the community (e.g. Mollusca clade [104]); but many open  
448 repositories can serve this purpose with low or no costs considering the size of the  
449 aforementioned outputs. There are open topic-centric repositories (e.g. Dfam [105] for  
450 repetitive DNA), general repositories (e.g. FigShare, Zenodo; or even NCBI for annotation  
451 tracks) as well as personal or institutional ones. Many of the reviewed genomic projects  
452 already made use of these repositories but failed to deposit some of the outputs. A solution  
453 for this inconvenience is to update submissions or create novel ones (e.g. submit annotations  
454 to NCBI or ENA) to deposit the missing outputs.

455 4. *Inform as much as possible if a dataset was edited (e.g. removal of exogenous DNA; gene*  
456 *and repetitive sequence filtering criteria).*

457 5. *Use and clearly identify software, database versions and references in all instances (e.g.*  
458 *RRID, BUSCO version and repetitive database version).*

459 6. *Deposit command lines and scripts used to handle data (from reads to full annotation).*

460 The latter suggestions (3-6) are mainly related to providing detailed methodologies of  
461 bioinformatic analyses. First, proper method and results descriptions can help to recover  
462 metadata and criteria usually not available in large sequence repositories. Second,  
463 comparative analyses depend upon standardization at different levels and significant sample  
464 sizes. The inclusion of species in downstream analyses is limited by data availability and  
465 proper description of previous analyses, custom software and results.

466 7. *Engage in community-driven conversations about standards, guidelines and species*  
467 *priorities.* There are a number of taxon-specific meetings that would be appropriate venues to  
468 engage in these conversations including the International Conference on Coelenterate Biology  
469 (~decennial; [106]), the International Jellyfish Blooms Symposium (~triennial), Cnidofest  
470 (~biennial; [107]), Tutzing workshop (~biennial; [108]), and Cnidofest zoom seminar series. In  
471 addition, satellite meetings at larger annual meetings (e.g. the Society for Integrative and  
472 Comparative Biology (SICB) or the Global Invertebrate Genomics Alliance (GIGA [101])) could  
473 provide appropriate venues to facilitate discussions on how the community can best move  
474 forward as more and more genomic data come online.

475 The adoption of best practices in the Medusozoa genomics community will pave the  
476 way for major breakthroughs regarding understanding the genomic basis for several  
477 evolutionary innovations that arose within and in the stem lineage of Medusozoa. Similar  
478 advances were achieved with extensive taxon sampling at broader scales, where 25 novel  
479 core gene groups enriched in regulatory functions might be underlying the emergence of  
480 animals [109,110]. Medusozoa innovations have puzzled the community for decades  
481 [5,7,11,111] and include the origin of the medusa, the loss of polyp structures, the  
482 establishment of symbiosis, the blooming potential, and the evolution of an extremely potent

483 venom. A deeper understanding of the genomic events driving these innovations will require  
484 accurate identifications of a number of key genomic features including (but not limited to)  
485 single copy orthologs, gene losses, lineage-specific genes, gene family expansions and non-  
486 coding regulatory sequences.

## 487 **Conclusions**

488 The pace of genomic development in Medusozoa is far more rapid than more  
489 traditional disciplines such as cytogenetics, where gaps still remain. As the effect of  
490 chromosome structural variants in evolution is increasingly tested and recognized, it is  
491 expected that these disciplines will gain a revived interest as has been seen in other animal  
492 groups [112]. In spite of the great advances in Medusozoa genomics, we found a general lack  
493 of standardization in methodologies and genome reports across independent sequencing  
494 projects. Efforts to incorporate standards would benefit future studies and could promote the  
495 identification of hitherto undiscovered evolutionary patterns.

496 It is safe to anticipate that standardization will become increasingly easier as  
497 chromosome-level assemblies become more commonplace and as new integrated workflows  
498 of data reporting and submission are developed (e.g. [113]). It will be possible to perform  
499 standardized annotation and analyses in order to identify patterns in medusozoa genome  
500 evolution.

501 The distribution of genetic and genomic information presented significant taxonomic  
502 gaps in Medusozoa. It is a reasonable scenario since genomic sequencing data is  
503 accumulating in many medusozoan lineages. Even so, some of the most species-rich clades  
504 with a diverse array of phenotypic and ecological traits have not yet had their genomes  
505 sequenced (e.g. Scyphozoa: Coronamedusae, Hydrozoa: Macrocolonia). These, and other,  
506 heretofore genomically underexplored lineages provide golden opportunities from which to  
507 make major contributions to understanding the evolution of Medusozoa genomes and would  
508 be a wonderful contribution to the rest of the Medusozoa research community. Defining

509 candidate species for sequencing can avoid unnecessary doubled efforts. Different  
510 international projects recognized this situation and proposed a set of criteria for prioritizing  
511 species at other scales, such as the GIGA ([101]).

512         Conversations about how best to promote such efforts and best practices for  
513 medusozoan genomics will help move the field forward. Such conversations could lead to new  
514 standards and potentially a powerful cnidarian genomics database. This latter goal would be  
515 most effective if accompanied by a strong alliance that spans the growing cnidarian genomics  
516 community.

517

#### 518 **Data availability**

519 All collected information, outputs and scripts supporting new results are available in the  
520 supplementary files S1-S9 in Figshare [114]. All genomic resources from previous articles and  
521 projects are publicly available and their sources are referenced in Supplementary file S4 Table  
522 S3. A copy of table S1 is available [114] and can be updated upon the original author's request.

523

#### 524 **Competing interests**

525 The authors declare that they have no competing interests

#### 526 **Author's contributions**

527 MDS collected the information, ran the analysis, conceived the study and drafted the  
528 manuscript; MMM collected the information, conceived the study, drafted and reviewed the  
529 manuscript; JR drafted and reviewed the manuscript. SCSA conceived the study, drafted and  
530 reviewed the manuscript. All authors gave final approval for publication.

#### 531 **Funding**

532 This work was supported by Coordenação de Aperfeiçoamento de Pessoal de Nível Superior  
533 88882.377420/2019-01 to MDS, Fundação de Amparo à Pesquisa do Estado de São Paulo  
534 FAPESP 2016/04560-9 to MMM, FAPESP 2015/20139-9 to SCSA.



535 **Acknowledgments**

536 We thank Analia Jaque for the jellyfish drawings of Figure 2, Juan M. Ferro for valuable  
537 comments on this review and Jonathan W. Lawley for the taxonomy update on the *Aurelia*  
538 samples.

539 **References**

- 540 1. World Register of Marine Species. Cnidaria.  
541 <http://www.marinespecies.org/aphia.php?p=taxdetails&id=126>. Accessed 24 Nov 2021.
- 542 2. Bosch TCG, Adamska M, Augustin R, Domazet-Loso T, Foret S, Fraune S, et al.. How do  
543 environmental factors influence life cycles and development? An experimental framework for  
544 early-diverging metazoans. *BioEssays*. 2014; doi: 10.1002/bies.201400065.
- 545 3. Cartwright P, Collins AG. Fossils and phylogenies: integrating multiple lines of evidence to  
546 investigate the origin of early major metazoan lineages. *Integr Comp Biol*. 2007; doi:  
547 10/bzhzc2.
- 548 4. Bridge D, Cunningham CW, Schierwater B, DeSalle R, Buss LW. Class-level relationships  
549 in the phylum Cnidaria: evidence from mitochondrial genome structure. *Proc Natl Acad Sci*  
550 *USA*. 1992; doi: 10/dxgw77.
- 551 5. Kayal E, Bentlage B, Sabrina Pankey M, Ohdera AH, Medina M, Plachetzki DC, et al..  
552 Phylogenomics provides a robust topology of the major cnidarian lineages and insights on  
553 the origins of key organismal traits. *BMC Evol Biol*. 2018; doi: 10.1186/s12862-018-1142-0.
- 554 6. Marques AC, Collins AG. Cladistic analysis of Medusozoa and cnidarian evolution.  
555 *Invertebr Biol*. 2004; doi: 10.1111/j.1744-7410.2004.tb00139.x.
- 556 7. Collins AG. Phylogeny of Medusozoa and the evolution of cnidarian life cycles. *J Evol*  
557 *Biol*. 2002; doi: 10.1046/j.1420-9101.2002.00403.x.
- 558 8. Boero F, Boero F Bouillon, J. Zoogeography and life cycle patterns of Mediterranean  
559 hydromedusae (Cnidaria). *Biol J Linn Soc*. 1993; doi: 10/cgvp43.
- 560 9. Da Silveira FL, Morandini AC. *Nausithoe aurea* n. sp.(Scyphozoa: Coronatae:  
561 Nausithoidae), a species with two pathways of reproduction after strobilation: sexual and

562 asexual. *Contrib Zool.* 1997;66:235–46.

563 10. Straehler-Pohl I, Jarms G. Morphology and life cycle of *Carybdea morandinii*, sp.  
564 nov.(Cnidaria), a cubozoan with zooxanthellae and peculiar polyp anatomy. *Zootaxa.*  
565 2011;2755:36–56.

566 11. Forêt S, Knack B, Houliston E, Momose T, Manuel M, Quéinnec E, et al.. New tricks with  
567 old genes: the genetic bases of novel cnidarian traits. *Trends Genet.* 2010; doi: 10/dd74gw.

568 12. Harvey EB. A review of the chromosome numbers in the Metazoa. Part I. *J Morphol.*  
569 1916; doi: 10.1002/jmor.1050280102.

570 13. Makino S. An atlas of the chromosome numbers in animals. 2nd ed. Ames: The Iowa  
571 State College Press; 1951.

572 14. Goldberg RB, Crain WR, Ruderman JV, Moore GP, Buckley TR, Higgins RC, et al.. DNA  
573 sequence organization in the genomes of five marine invertebrates. *Chromosoma.* 1975; doi:  
574 10.1007/BF00284817.

575 15. Adachi K, Miyake H, Kuramochi T, Mizusawa K, Okumura S. Genome size distribution in  
576 phylum Cnidaria. *Fish Sci.* 2017; doi: 10/ggbqnf.

577 16. Dunn CW, Ryan JF. The evolution of animal genomes. *Curr Opin Genet Dev.* 2015; doi:  
578 10/gfkjbf.

579 17. Goodwin S, McPherson JD, McCombie WR. Coming of age: ten years of next-generation  
580 sequencing technologies. *Nat Rev Genet.* 2016; doi: 10.1038/nrg.2016.49.

581 18. Lewis Ames C, Ryan JF, Bely AE, Cartwright P, Collins AG. A new transcriptome and  
582 transcriptome profiling of adult and larval tissue in the box jellyfish *Alatina alata*: an emerging  
583 model for studying venom, vision and sex. *BMC Genomics.* 2016; doi: 10.1186/s12864-016-  
584 2944-3.

585 19. Gold DA, Katsuki T, Li Y, Yan X, Regulski M, Ibberson D, et al.. The genome of the  
586 jellyfish *Aurelia* and the evolution of animal complexity. *Nat Ecol Evol.* 2019; doi: 10/gfkwp4.

587 20. Khalturin K, Shinzato C, Khalturina M, Hamada M, Fujie M, Koyanagi R, et al..  
588 Medusozoan genomes inform the evolution of the jellyfish body plan. *Nat Ecol Evol.* 2019;  
589 doi: 10/gfzg9m.

- 590 21. Leclère L, Horin C, Chevalier S, Lapébie P, Dru P, Peron S, et al.. The genome of the  
591 jellyfish *Clytia hemisphaerica* and the evolution of the cnidarian life-cycle. *Nat Ecol Evol*.  
592 2019; doi: 10/gfwr3v.
- 593 22. Ohdera A, Ames CL, Dikow RB, Kayal E, Chiodin M, Busby B, et al.. Box, stalked, and  
594 upside-down? Draft genomes from diverse jellyfish (Cnidaria, Acraspeda) lineages: *Alatina*  
595 *alata* (Cubozoa), *Calvadosia cruxmelitensis* (Staurozoa), and *Cassiopea xamachana*  
596 (Scyphozoa). *GigaScience*. 2019; doi: 10.1093/gigascience/giz069.
- 597 23. Steele RE, David CN, Technau U. A genomic view of 500 million years of cnidarian  
598 evolution. *Trends Genet TIG*. 2011; doi: 10/b53t8x.
- 599 24. Technau U, Schwaiger M. Recent advances in genomics and transcriptomics of  
600 cnidarians. *Mar Genomics*. 2015; doi: 10.1016/j.margen.2015.09.007.
- 601 25. Alama-Bermejo G, Holzer AS. Advances and discoveries in myxozoan genomics. *Trends*  
602 *Parasitol*. 2021; doi: 10.1016/j.pt.2021.01.010.
- 603 26. D'Ambra I, Lauritano C. A review of toxins from Cnidaria. *Mar Drugs*. 2020; doi:  
604 10.3390/md18100507.
- 605 27. NCBI Resource Coordinators N. Database resources of the National Center for  
606 Biotechnology Information. *Nucleic Acids Res*. 2015; doi: 10.1093/nar/gku1130.
- 607 28. Bushnell B. BBMap v38.73. <https://sourceforge.net/projects/bbmap/>. Accessed 25 May  
608 2021.
- 609 29. Dainat J, Hereñú D, Pucholt P. NBISweden/AGAT: AGAT-v0.6.0. *Zenodo*. 2021; doi:  
610 10.5281/zenodo.4637977.
- 611 30. Simão FA, Waterhouse RM, Ioannidis P, Kriventseva EV, Zdobnov EM. BUSCO:  
612 assessing genome assembly and annotation completeness with single-copy orthologs.  
613 *Bioinformatics*. 2015; doi: 10.1093/bioinformatics/btv351.
- 614 31. Afgan E, Baker D, Batut B, van de Beek M, Bouvier D, Čech M, et al.. The Galaxy  
615 platform for accessible, reproducible and collaborative biomedical analyses: 2018 update.  
616 *Nucleic Acids Res*. 2018; doi: 10.1093/nar/gky379.
- 617 32. Galaxy. <https://usegalaxy.org/>. Accessed 10 Aug 2021.

618 33. Lewin HA, Robinson GE, Kress WJ, Baker WJ, Coddington J, Crandall KA, et al.. Earth  
619 BioGenome Project: sequencing life for the future of life. *Proc Natl Acad Sci.* 2018; doi:  
620 10/gdh5vz.

621 34. Huerta-Cepas J, Serra F, Bork P. ETE 3: Reconstruction, analysis and visualization of  
622 phylogenomic data. *Mol Biol Evol.* 2016; doi: 10/gfzpph.

623 35. Caswell TA, Droettboom M, Lee A, Hunter J, Firing E, Andrade ES de, et al.. Matplotlib  
624 release v3.3.1. *Zenodo.* 2020; doi: 10.5281/zenodo.3984190.

625 36. Waskom ML. Seaborn: statistical data visualization. *J Open Source Softw.* 2021; doi:  
626 10.21105/joss.03021.

627 37. Inkscape Project IW. Inkscape. <https://inkscape.org/>. Accessed 21 Jan 2022.

628 38. Bayha KM, Dawson MN, Collins AG, Barbeitos MS, Haddock SHDD. Evolutionary  
629 relationships among scyphozoan jellyfish families based on complete taxon sampling and  
630 phylogenetic analyses of 18S and 28S ribosomal DNA. *Integr Comp Biol.* 2010; doi:  
631 10.1093/icb/icq074.

632 39. Maronna MM, Miranda TP, Peña Cantero ÁL, Barbeitos MS, Marques AC. Towards a  
633 phylogenetic classification of Leptothecata (Cnidaria, Hydrozoa). *Sci Rep.* 2016; doi:  
634 10/ggbrh4.

635 40. Mendoza-Becerril MA, Jaimes-Becerra AJ, Collins AG, Marques AC. Phylogeny and  
636 morphological evolution of the so-called bougainvilliids (Hydrozoa, Hydroidolina). *Zool Scr.*  
637 2018; doi: 10/gd4ftz.

638 41. Elliott TA, Gregory TR. What's in a genome? The C-value enigma and the evolution of  
639 eukaryotic genome content. *Phil Trans R Soc B.* 2015; doi: 10/gfkjbq.

640 42. Wilbrandt J, Misof B, Niehuis O. COGNATE: comparative gene annotation characterizer.  
641 *BMC Genomics.* 2017; doi: 10/ggbrijp.

642 43. Tardent P. Coelenterata, Cnidaria. 1st ed. Jena/Stuttgart: Gustav Fischer; 1978.

643 44. Kubota S. Systematic study on a bivalve-inhabiting hydroid *Eucheilota intermedia* Kubota  
644 from central Japan. *J Fac Sci Hokkaido Univ Ser VI Zool.* 1985;24:pl. I.

645 45. Kubota S. Taxonomic study on *Hydrocoryne miurensis* (Hydrozoa). *Publ SETO Mar Biol*

646 *Lab.* 1988;33:1–18.

647 46. Kubota S. Second finding of *Stylactaria piscicola* (Komai, 1932) comb. nov. (Hydrozoa:  
648 Hydractiniidae) from off Atsumi Peninsula, Japan. *Publ Seto Mar Biol Lab.* 1991;35:11–5.

649 47. Kubota S. Chromosome number of a bivalve-inhabiting hydroid, *Eugymnanthea japonica*  
650 (Leptomedusae: Eirenidae) from Japan. *Publ SETO Mar Biol Lab.* 1992;35:383–6.

651 48. Ping Guo. The karyotype of *Rhopilema esculenta*. *J Fish China.* 1994;18:253–5.

652 49. Anokhin B, Kuznetsova V. Chromosome morphology and banding patterns in *Hydra*  
653 *oligactis* Pallas and *H. circumcincta* Schultze (Hydroidea, Hydrida). *FOLIA Biol-KRAKOW.*  
654 1999;47:91–6.

655 50. Anokhin B, Nokkala S. Characterization of C-heterochromatin in four species of  
656 Hydrozoa (Cnidaria) by sequence specific fluorochromes Chromomycin A<sub>3</sub> and DAPI.  
657 *Caryologia.* 2004; doi: 10.1080/00087114.2004.10589387.

658 51. Anokhin BA, Kuznetsova VG. FISH-based karyotyping of *Pelmatohydra oligactis* (Pallas,  
659 1766), *Hydra oxycnida* Schulze, 1914, and *H. magnipapillata* Itô, 1947 (Cnidaria, Hydrozoa).  
660 *Comp Cytogenet.* 2018; doi: 10/gfst43.

661 52. Pflug JM, Holmes VR, Burrus C, Johnston JS, Maddison DR. Measuring genome sizes  
662 using read-depth, k-mers, and flow cytometry: methodological comparisons in beetles  
663 (Coleoptera). *G3 (Bethesda).* 2020; doi: 10.1534/g3.120.401028.

664 53. Lawley JW, Gamero-Mora E, Maronna MM, Chiaverano LM, Stampar SN, Hopcroft RR,  
665 et al.. The importance of molecular characters when morphological variability hinders  
666 diagnosability: systematics of the moon jellyfish genus *Aurelia* (Cnidaria: Scyphozoa). *PeerJ.*  
667 2021; doi: 10.7717/peerj.11954.

668 54. GigaDB. <http://gigadb.org>. Accessed 1 Apr 2021.

669 55. Hydra 2.0 Web Portal. <https://research.nhgri.nih.gov/hydra/>. Accessed 1 Apr 2021.

670 56. OIST Marine Genomics Unit Genome Browser. <https://marinegenomics.oist.jp/gallery>.  
671 Accessed 1 Apr 2021.

672 57. MARIMBA. <http://marimba.obs-vlfr.fr/>. Accessed 1 Apr 2021.

673 58. IRIDIAN GENOMES. <https://www.iridiangenomes.com/>. Accessed 1 Apr 2021.

674 59. Li Y, Gao L, Pan Y, Tian M, Li Y, He C, et al.. Chromosome-level reference genome of  
675 the jellyfish *Rhopilema esculentum*. *GigaScience*. 2020; doi: 10.1093/gigascience/giaa036.

676 60. Galliot B, Schummer M. 'Guessmer' screening strategy applied to species with AT-rich  
677 coding sequences. *Trends Genet*. 1993; doi: 10.1016/0168-9525(93)90051-I.

678 61. Hoff K, Stanke M. Current methods for automated annotation of protein-coding genes.  
679 *Curr Opin Insect Sci*. 2015; doi: 10.1016/j.cois.2015.02.008.

680 62. Peona V, Blom MPK, Xu L, Burri R, Sullivan S, Bunikis I, et al.. Identifying the causes  
681 and consequences of assembly gaps using a multiplatform genome assembly of a bird-of-  
682 paradise. *Mol Ecol Resour*. 2020; doi: 10.1111/1755-0998.13252.

683 63. Nong W, Cao J, Li Y, Qu Z, Sun J, Swale T, et al.. Jellyfish genomes reveal distinct  
684 homeobox gene clusters and conservation of small RNA processing. *Nat Commun*. 2020;  
685 doi: 10.1038/s41467-020-16801-9.

686 64. Xia W-X, Li H-R, Ge J-H, Liu Y-W, Li H-H, Su Y-H, et al.. High-continuity genome  
687 assembly of the jellyfish *Chrysaora quinquecirrha*. *Zool Res*. 2021; doi:  
688 10.24272/j.issn.2095-8137.2020.258.

689 65. Putnam NH, Srivastava M, Hellsten U, Dirks B, Chapman J, Salamov A, et al.. Sea  
690 anemone genome reveals ancestral eumetazoan gene repertoire and genomic organization.  
691 *Science*. 2007; doi: 10.1126/science.1139158.

692 66. Taguchi T, Tagami E, Mezaki T, Sekida S, Chou Y, Soong K, et al.. Recent progress of  
693 molecular cytogenetic study on scleractinian (stony) corals. *Kuroshio Sci*. 2017;9.

694 67. Technau U, Robb S, Genikhovich G, Montenegro J, Fropf W, Weinguny L, et al.. Sea  
695 anemone genomes reveal ancestral metazoan chromosomal macrosynteny. *Res Sq*. 2021;  
696 doi: 10.21203/rs.3.rs-796229/v1.

697 68. Blommaert J. Genome size evolution: towards new model systems for old questions.  
698 *Proc R Soc B Biol Sci*. 2020; doi: 10.1098/rspb.2020.1441.

699 69. Wong WY, Simakov O, Bridge DM, Cartwright P, Bellantuono AJ, Kuhn A, et al..  
700 Expansion of a single transposable element family is associated with genome-size increase  
701 and radiation in the genus *Hydra*. *Proc Natl Acad Sci*. 2019; doi: 10/ggdjfb.

702 70. Schrader L, Schmitz J. The impact of transposable elements in adaptive evolution. *Mol*  
703 *Ecol.* 2019; doi: 10.1111/mec.14794.

704 71. Cosby RL, Judd J, Zhang R, Zhong A, Garry N, Pritham EJ, et al.. Recurrent evolution of  
705 vertebrate transcription factors by transposase capture. *Science.* 2021; doi:  
706 10.1126/science.abc6405.

707 72. Hamada M, Satoh N, Khalturin K. A reference genome from the symbiotic hydrozoan,  
708 *Hydra viridissima*. *G3 (Bethesda).* 2020; doi: 10.1534/g3.120.401411.

709 73. Kim H-M, Weber JA, Lee N, Park SG, Cho YS, Bhak Y, et al.. The genome of the giant  
710 Nomura's jellyfish sheds light on the early evolution of active predation. *BMC Biol.* 2019; doi:  
711 10/gfxm7p.

712 74. Xia W, Li H, Cheng W, Li H, Mi Y, Gou X, et al.. High-quality genome assembly of  
713 *Chrysaora quinquecirrha* provides insights into the adaptive evolution of jellyfish. *Front*  
714 *Genet.* 2020; doi: 10.3389/fgene.2020.00535.

715 75. Graur D, Zheng Y, Azevedo RBR. An evolutionary classification of genomic function.  
716 *Genome Biol Evol.* 2015; doi: 10.1093/gbe/evv021.

717 76. Chapman J a, Kirkness EF, Simakov O, Hampson SE, Mitros T, Weinmaier T, et al.. The  
718 dynamic genome of *Hydra*. *Nature.* 2010; doi: 10.1038/nature08830.

719 77. Galliot B. *Hydra*, a fruitful model system for 270 years. *Int J Dev Biol.* 2012; doi:  
720 10.1387/ijdb.120086bg.

721 78. Tomczyk S, Fischer K, Austad S, Galliot B. *Hydra*, a powerful model for aging studies.  
722 *Invertebr Reprod Dev.* 2015; doi: 10.1080/07924259.2014.927805.

723 79. Weisman CM, Murray AW, Eddy SR. Many, but not all, lineage-specific genes can be  
724 explained by homology detection failure. *PLOS Biol.* 2020; doi:  
725 10.1371/journal.pbio.3000862.

726 80. Weisman CM, Murray AW, Eddy SR. Mixing genome annotation methods in a  
727 comparative analysis inflates the apparent number of lineage-specific genes. *bioRxiv*; 2022;

728 81. Chen Y, González-Pech RA, Stephens TG, Bhattacharya D, Chan CX. Evidence that  
729 inconsistent gene prediction can mislead analysis of dinoflagellate genomes. *J Phycol.* 2020;

730 doi: 10.1111/jpy.12947.

731 82. Martín-Durán JM, Ryan JF, Vellutini BC, Pang K, Hejnol A. Increased taxon sampling  
732 reveals thousands of hidden orthologs in flatworms. *Genome Res.* 2017; doi:  
733 10.1101/gr.216226.116.

734 83. Natsidis P, Kapli P, Schiffer PH, Telford MJ. Systematic errors in orthology inference and  
735 their effects on evolutionary analyses. *iScience.* 2021; doi: 10.1016/j.isci.2021.102110.

736 84. Quattrini AM, Rodríguez E, Faircloth BC, Cowman PF, Brugler MR, Farfan GA, et al..  
737 Palaeoclimate ocean conditions shaped the evolution of corals and their skeletons through  
738 deep time. *Nat Ecol Evol.* 2020; doi: 10.1038/s41559-020-01291-1.

739 85. Schriml LM, Chuvochina M, Davies N, Eloë-Fadrosch EA, Finn RD, Hugenholtz P, et al..  
740 COVID-19 pandemic reveals the peril of ignoring metadata standards. *Sci Data.* 2020; doi:  
741 10.1038/s41597-020-0524-5.

742 86. Martinez PA, Jacobina UP, Fernandes RV, Brito C, Penone C, Amado TF, et al.. A  
743 comparative study on karyotypic diversification rate in mammals. *Heredity.* 2017; doi:  
744 10.1038/hdy.2016.110.

745 87. Toczydlowski RH, Liggins L, Gaither MR, Anderson TJ, Barton RL, Berg JT, et al.. Poor  
746 data stewardship will hinder global genetic diversity surveillance. *Proc Natl Acad Sci.* 2021;  
747 doi: 10.1073/pnas.2107934118.

748 88. Bayer PE, Edwards D, Batley J. Bias in resistance gene prediction due to repeat  
749 masking. *Nat Plants.* 2018; doi: 10.1038/s41477-018-0264-0.

750 89. Fiddes IT, Armstrong J, Diekhans M, Nachtweide S, Kronenberg ZN, Underwood JG, et  
751 al.. Comparative Annotation Toolkit (CAT)—simultaneous clade and personal genome  
752 annotation. *Genome Res.* 2018; doi: 10.1101/gr.233460.117.

753 90. König S, Romoth LW, Gerischer L, Stanke M. Simultaneous gene finding in multiple  
754 genomes. *Bioinforma Oxf Engl.* 2016; doi: 10.1093/bioinformatics/btw494.

755 91. Dunne MP, Kelly S. OMGene: mutual improvement of gene models through optimisation  
756 of evolutionary conservation. *BMC Genomics.* 2018; doi: 10.1186/s12864-018-4704-z.

757 92. Dunne MP, Kelly S. OrthoFiller: utilising data from multiple species to improve the



758 completeness of genome annotations. *BMC Genomics*. 2017; doi: 10.1186/s12864-017-  
759 3771-x.

760 93. Hua Z, Early MJ. Closing target trimming and CTTdocker programs for discovering  
761 hidden superfamily loci in genomes. *PLOS ONE*. 2019; doi: 10.1371/journal.pone.0209468.

762 94. Kim S, Cheong K, Park J, Kim M-S, Kim J, Seo M-K, et al.. TGFam-Finder: a novel  
763 solution for target-gene family annotation in plants. *New Phytol*. 2020; doi:  
764 10.1111/nph.16645.

765 95. Ottenburghs J, Geng K, Suh A, Kutter C. Genome size reduction and transposon activity  
766 impact tRNA gene diversity while ensuring translational stability in birds. *Genome Biol Evol*.  
767 2021; doi: 10.1093/gbe/evab016.

768 96. Arita M, Karsch-Mizrachi I, Cochrane G, on behalf of the International Nucleotide  
769 Sequence Database Collaboration. The international nucleotide sequence database  
770 collaboration. *Nucleic Acids Res*. 2021; doi: 10.1093/nar/gkaa967.

771 97. Kodama Y, Shumway M, Leinonen R. The Sequence Read Archive: explosive growth of  
772 sequencing data. *Nucleic Acids Res*. 2012; doi: 10/fw3c92.

773 98. Hemmrich G, Bosch TC. Compagen, a comparative genomics platform for early  
774 branching metazoan animals, reveals early origins of genes regulating stem- cell  
775 differentiation. *Bioessays*. Wiley Online Library; 2008;30:1010–8.

776 99. Ryan JF, Finnerty JR. CnidBase : The Cnidarian Evolutionary Genomics Database.  
777 *Nucleic Acids Res*. 2003; doi: 10.1093/nar/gkg116.

778 100. Wilkinson MD, Dumontier M, Aalbersberg IJ, Appleton G, Axton M, Baak A, et al.. The  
779 FAIR Guiding Principles for scientific data management and stewardship. *Sci Data*. 2016;  
780 doi: 10.1038/sdata.2016.18.

781 101. GIGA Community of Scientists. The Global Invertebrate Genomics Alliance (GIGA):  
782 developing community resources to study diverse invertebrate genomes. *J Hered*. 2014; doi:  
783 10.1093/jhered/est084.

784 102. Ewels P, Magnusson M, Lundin S, Källner M. MultiQC: summarize analysis results for  
785 multiple tools and samples in a single report. *Bioinformatics*. 2016; doi:

786 10.1093/bioinformatics/btw354.

787 103. Challis R, Richards E, Rajan J, Cochrane G, Blaxter M. BlobToolKit – interactive quality  
788 assessment of genome assemblies. *G3 (Bethesda)*. 2020; doi: 10.1534/g3.119.400908.

789 104. Liu F, Li Y, Yu H, Zhang L, Hu J, Bao Z, et al.. MolluscDB: an integrated functional and  
790 evolutionary genomics database for the hyper-diverse animal phylum Mollusca. *Nucleic  
791 Acids Res.* 2021; doi: 10.1093/nar/gkaa918.

792 105. Storer J, Hubley R, Rosen J, Wheeler TJ, Smit AF. The Dfam community resource of  
793 transposable element families, sequence models, and genome annotations. *Mob DNA*.  
794 2021; doi: 10.1186/s13100-020-00230-y.

795 106. Fautin DG, Westfall JA, Cartwright P, Daly M, Wyttenbach CR. Coelenterate Biology  
796 2003: trends in research on Cnidaria and Ctenophora. *Hydrobiologia*. 2005;530:11–3.

797 107. He S, Grasis JA, Nicotra ML, Juliano CE, Schnitzler CE. Cnidofest 2018: the future is  
798 bright for cnidarian research. *Evodevo*. 2019; doi: 10.1186/s13227-019-0134-5.

799 108. Funayama N, Frank U. Meeting report on “At the roots of bilaterian complexity: insights  
800 from early emerging metazoans,” Tutzing (Germany) September 16–19, 2019. *BioEssays*.  
801 2020; doi: 10.1002/bies.201900236.

802 109. Paps J, Holland PWH. Reconstruction of the ancestral metazoan genome reveals an  
803 increase in genomic novelty. *Nat Commun*. 2018; doi: 10.1038/s41467-018-04136-5.

804 110. Guijarro-Clarke C, Holland PWH, Paps J. Widespread patterns of gene loss in the  
805 evolution of the animal kingdom. *Nat Ecol Evol*. 2020; doi: 10.1038/s41559-020-1129-2.

806 111. Dawson MN, Hamner WM. A character-based analysis of the evolution of jellyfish  
807 blooms: adaptation and exaptation. *Hydrobiologia*. 2009; doi: 10.1007/s10750-008-9591-x.

808 112. Deakin JE, Potter S, O’Neill R, Ruiz-Herrera A, Cioffi MB, Eldridge MD, et al..  
809 Chromosomics: Bridging the gap between genomes and chromosomes. *Genes*. 2019; doi:  
810 10.3390/genes10080627.

811 113. Dimitrova M, Meyer R, Buttigieg PL, Georgiev T, Zhelezov G, Demirov S, et al.. A  
812 streamlined workflow for conversion, peer review, and publication of genomics metadata as  
813 omics data papers. *GigaScience*. 2021; doi: 10.1093/gigascience/giab034.

814 114. Santander MD, Maronna MM, Ryan JF, Andrade S. The state of Medusozoa genomics:  
815 supplementary material. doi: 10.6084/m9.figshare.17155676  
816 115. Hydractinia Genome Project Portal. <https://research.nhgri.nih.gov/hydractinia/>.  
817 Accessed 1 Apr 2021.  
818 116. Vogg MC, Beccari L, Iglesias Ollé L, Rampon C, Vríz S, Perruchoud C, et al.. An  
819 evolutionarily-conserved Wnt3/ $\beta$ -catenin/Sp5 feedback loop restricts head organizer activity  
820 in *Hydra*. *Nat Commun*. 2019; doi: 10.1038/s41467-018-08242-2.  
821 117. Migotto AE, Vellutini BC. Cifonauta: Banco de Imagens de Biologia Marinha.  
822 <http://cifonauta.cebimar.usp.br/>. Accessed 2 Feb 2022.

823

824 **Table 1 - Genomic projects related to Medusozoa HTS.** Sequencing projects with no  
825 current related publication are remarked with capital letters. Column "Main research topics"  
826 describes keywords according to references, restricted to a maximum of 4; "gene evolution"  
827 refers to the study of gene gains/losses and also of specific gene families. Species with  
828 reported assemblies were re-analyzed in this review (bold; Supplementary file S5 Table S3).  
829 UMCG=University Medical Center Groningen; IISER PRune=Indian Institute of Science  
830 Education and Research, Pune; NHGRI=The National Human Genome Research Institute;  
831 TF=transcription factors; \*"preliminary" assembly available at the institutional site; \*\*species  
832 with taxonomic updates. For further details see Supplementary file S1.

833

| Project             | Release year (NCBI-SRA) | Class (n° genomes) | Species                       | Main research topics                                      |
|---------------------|-------------------------|--------------------|-------------------------------|-----------------------------------------------------------|
| Chapman et al. [76] | 2008                    | Hydrozoa (1)       | <i>Hydra vulgaris</i>         | Gene evolution; micro-synteny                             |
| IISER Pune          | 2014-2015               | Hydrozoa (1)       | <i>Hydra vulgaris</i>         | not_informed                                              |
| NHGRI [55]          | no SRA                  | Hydrozoa (1)       | <i>Hydra vulgaris</i>         | not_informed                                              |
| NHGRI [115]         | 2016                    | Hydrozoa (1)       | <i>Hydractinia echinata</i> * | not_informed                                              |
| Gold et al. [19]    | 2018                    | Scyphozoa (1)      | <i>Aurelia coerulea</i>       | Life cycle; gene evolution; intraspecies variability; HOX |
| IRIDIAN             | 2018                    | Hydrozoa (1)       | <i>Craspedacusta sowerbii</i> | not_informed                                              |

|                       |      |               |                                                          |                                                               |
|-----------------------|------|---------------|----------------------------------------------------------|---------------------------------------------------------------|
| GENOMES [58]          |      |               |                                                          |                                                               |
| Kim et al. [73]       | 2018 | Scyphozoa (1) | <i>Nemopilema nomurai</i>                                | Life cycle; jellyfish body patterning; gene evolution; toxins |
| IRIDIAN GENOMES [58]  | 2019 | Hydrozoa (1)  | <i>Scolionema suvaense</i>                               | not_informed                                                  |
| Khalturin et al. [20] | 2019 | Scyphozoa (2) | <i>Aurelia aurita</i> ** , <i>Aurelia coerulea</i> **    | Life cycle; jellyfish body plan; gene evolution; synteny      |
|                       |      | Cubozoa (1)   | <i>Morbakka virulenta</i>                                |                                                               |
| Leclère et al. [21]   | 2019 | Hydrozoa (1)  | <i>Clytia hemisphaerica</i>                              | Life cycle; gene evolution; micro-synteny; TF                 |
| Odhera et al. [22]    | 2019 | Scyphozoa (1) | <i>Cassiopea xamachana</i>                               | Gene evolution; micro-synteny; Homeobox; toxins               |
|                       |      | Cubozoa (1)   | <i>Alatina alata</i>                                     |                                                               |
|                       |      | Staurozoa (1) | <i>Calvadosia cruxmelitensis</i>                         |                                                               |
| Vogg et al. [116]     | 2019 | Hydrozoa (1)  | <i>Hydra oligactis</i> ; <i>Hydra viridissima</i>        | Gene evolution; RTKs; developmental genes                     |
| Hamada et al. [72]    | 2020 | Hydrozoa (1)  | <i>Hydra viridissima</i>                                 | Symbiosis; immune response; repetitive DNA; Homeobox          |
| IRIDIAN GENOMES [58]  | 2020 | Cubozoa (3)   | <i>Alatinidae sp.</i>                                    | not_informed                                                  |
|                       |      |               | <i>Carybdea marsupialis</i>                              |                                                               |
|                       |      |               | <i>Tamoya ohboya</i>                                     |                                                               |
|                       |      | Hydrozoa (2)  | <i>Cladonema radiatum</i>                                |                                                               |
|                       |      |               | <i>Eutima sp. BMK-2020</i>                               |                                                               |
|                       |      | Scyphozoa (4) | <i>Aurelia coerulea</i>                                  |                                                               |
|                       |      |               | <i>Chrysaora achlyos</i>                                 |                                                               |
|                       |      |               | <i>Chrysaora chesapeakei</i>                             |                                                               |
|                       |      |               | <i>Chrysaora fuscescens</i>                              |                                                               |
|                       |      | Staurozoa (1) | <i>Calvadosia cruxmelitensis</i>                         |                                                               |
| Li et al. [59]        | 2020 | Scyphozoa (1) | <i>Rhopilema esculentum</i>                              | Gene evolution; toxins                                        |
| Nong et al. [63]      | 2020 | Scyphozoa (2) | <i>Sanderia malayensis</i> , <i>Rhopilema esculentum</i> | Gene evolution; small RNAs; micro-synteny; Homeobox           |
| Xia et al. [74]       | 2020 | Scyphozoa (1) | <i>Chrysaora quinquecirrha</i>                           | Gene and gene feature evolution; repetitive DNA               |
| Xia et al. [64]       | 2020 | Scyphozoa (1) | <i>Chrysaora quinquecirrha</i>                           | Assembly improvement report                                   |
| UMCG                  | 2021 | Scyphozoa (1) | <i>Cassiopea andromeda</i>                               | not_informed                                                  |

835 **Figure 1 - Medusozoa diversity.** Examples of different genus covered by this review belong  
836 to Hydrozoa (A-B), Staurozoa (C), Cubozoa (D-E) and Scyphozoa (F-G). A) *Craspedacusta*  
837 *sowerbii*, B) *Cladonema radiatum*, C) *Haliclystus sanjuanensis*, D) *Carybdea sivickisi*, E)  
838 *Tamoya haplonema*, F) *Cassiopea xamachana*, G) *Aurelia aurita*. Credits to Alvaro E. Migotto  
839 (A, B, E), Marta Chiodin (C), Joseph Ryan (F, G) and Cheryl Ames Lewis (D). Photographs A,  
840 B, D, E were obtained from Cifonauta [117]. Photographs are not to scale.

841 **Figure 2 - Phylogenetic distribution of genomic information in Medusozoa.** A) Number  
842 of described species and number of species with genomic data; B) Chromosome number (2n)  
843 range; C) Genome size (Mbp) range taking into account Flow Cytometry and Feulgen  
844 Densitometry estimations; D) Total number of available assemblies and number of species  
845 with assembled genomes. In B) and C) single values were also included when only one  
846 species was characterized. Tree topology is explained in the methods section. Information  
847 used for this graph is available at Supplementary file S5 Table S2.

848 **Figure 3 - Assembly and genome features.** In A) is reported (from left to right): mean  
849 assembly length per class, GC content (%) per class, number of contigs and scaffolds per  
850 assembly coloured by class, contig and scaffold N50 (in Kbp) per assembly coloured by class,  
851 and count of assemblies of each class corresponding to the different BGP-metric values,  
852 where X and Y correspond to contig and scaffold N50 respectively, and Z to chromosome  
853 assignment (see methods section). In B) is reported (from left to right): mean repeat length  
854 (Mbp) in assembly per class, mean total number of genes per class, mean exon number (count  
855 per gene) per class, and mean gene, intron and exon length (Kbp) per assembly coloured by  
856 class. The yellow arrowhead indicates *S. malayensis* gene features (See Box). All other  
857 references are specified in the figure. Mbp=millions of base pairs. Information used for this  
858 graph is available at Supplementary file S5 Tables S4-6.

859 **Figure 4 - BUSCO Metazoa gene distribution in Medusozoa assemblies.** Each column  
860 corresponds to a gene and each row an assembly. Columns were ordered based on presence

861 from left to right and the least present genes (n=96) are shown in detail. Genes absent in all  
862 or almost all assemblies (more than 80% of absence) are indicated in red; genes also reported  
863 absent [20] are indicated in bold; genes absent in specific lineages are indicated with yellow  
864 rectangles. Higher quality assemblies are indicated in orange (BGP-metric > 1.0.0). The  
865 assembly with the highest quality score for BGP-metric is indicated by an orange circle and  
866 corresponds to *Rhopilema esculentum* [59]. Information used for this graph and full BUSCO  
867 gene names are available at Supplementary file S5 Table S7.

868

### 869 **Supplementary Material**

870 Supplementary file S1. Dataset 1. Genome report sheet.

871 Supplementary file S2. Dataset 2. Command line to retrieve data from NCBI and to generate  
872 new results.

873 Supplementary file S3. Dataset 3. Scripts used for graph construction.

874 Supplementary file S4. Table S1. Species information considering chromosome number,  
875 genome size and genomic datasets.

876 Supplementary file S5. Tables S2-8 - All information used for constructing graphs presented  
877 in this work. Includes summary information of Figure 2 (table S2), genome resources used in  
878 this study (table S3), assembly statistics for Figure 3A (table S4), genome features of Figure  
879 3B (table S5, S6) and BUSCO results for Figure 4 and Supplementary figure S1 (tables S7,  
880 S8).

881 Supplementary file S6. Figure S1. BUSCO Eukaryota gene distribution in Medusozoa  
882 assemblies. Each column corresponds to a gene and each row an assembly. Information used  
883 for this graph is available at Supplementary file S4 Table S8.

884 Supplementary file S7 - Dataset 4. Original metadata from NCBI.

885 Supplementary file S8 - Dataset 5. Original results from AGAT and Galaxy server (BUSCO).

886 Supplementary file S9 - Dataset 6. Figures in vectorial format.

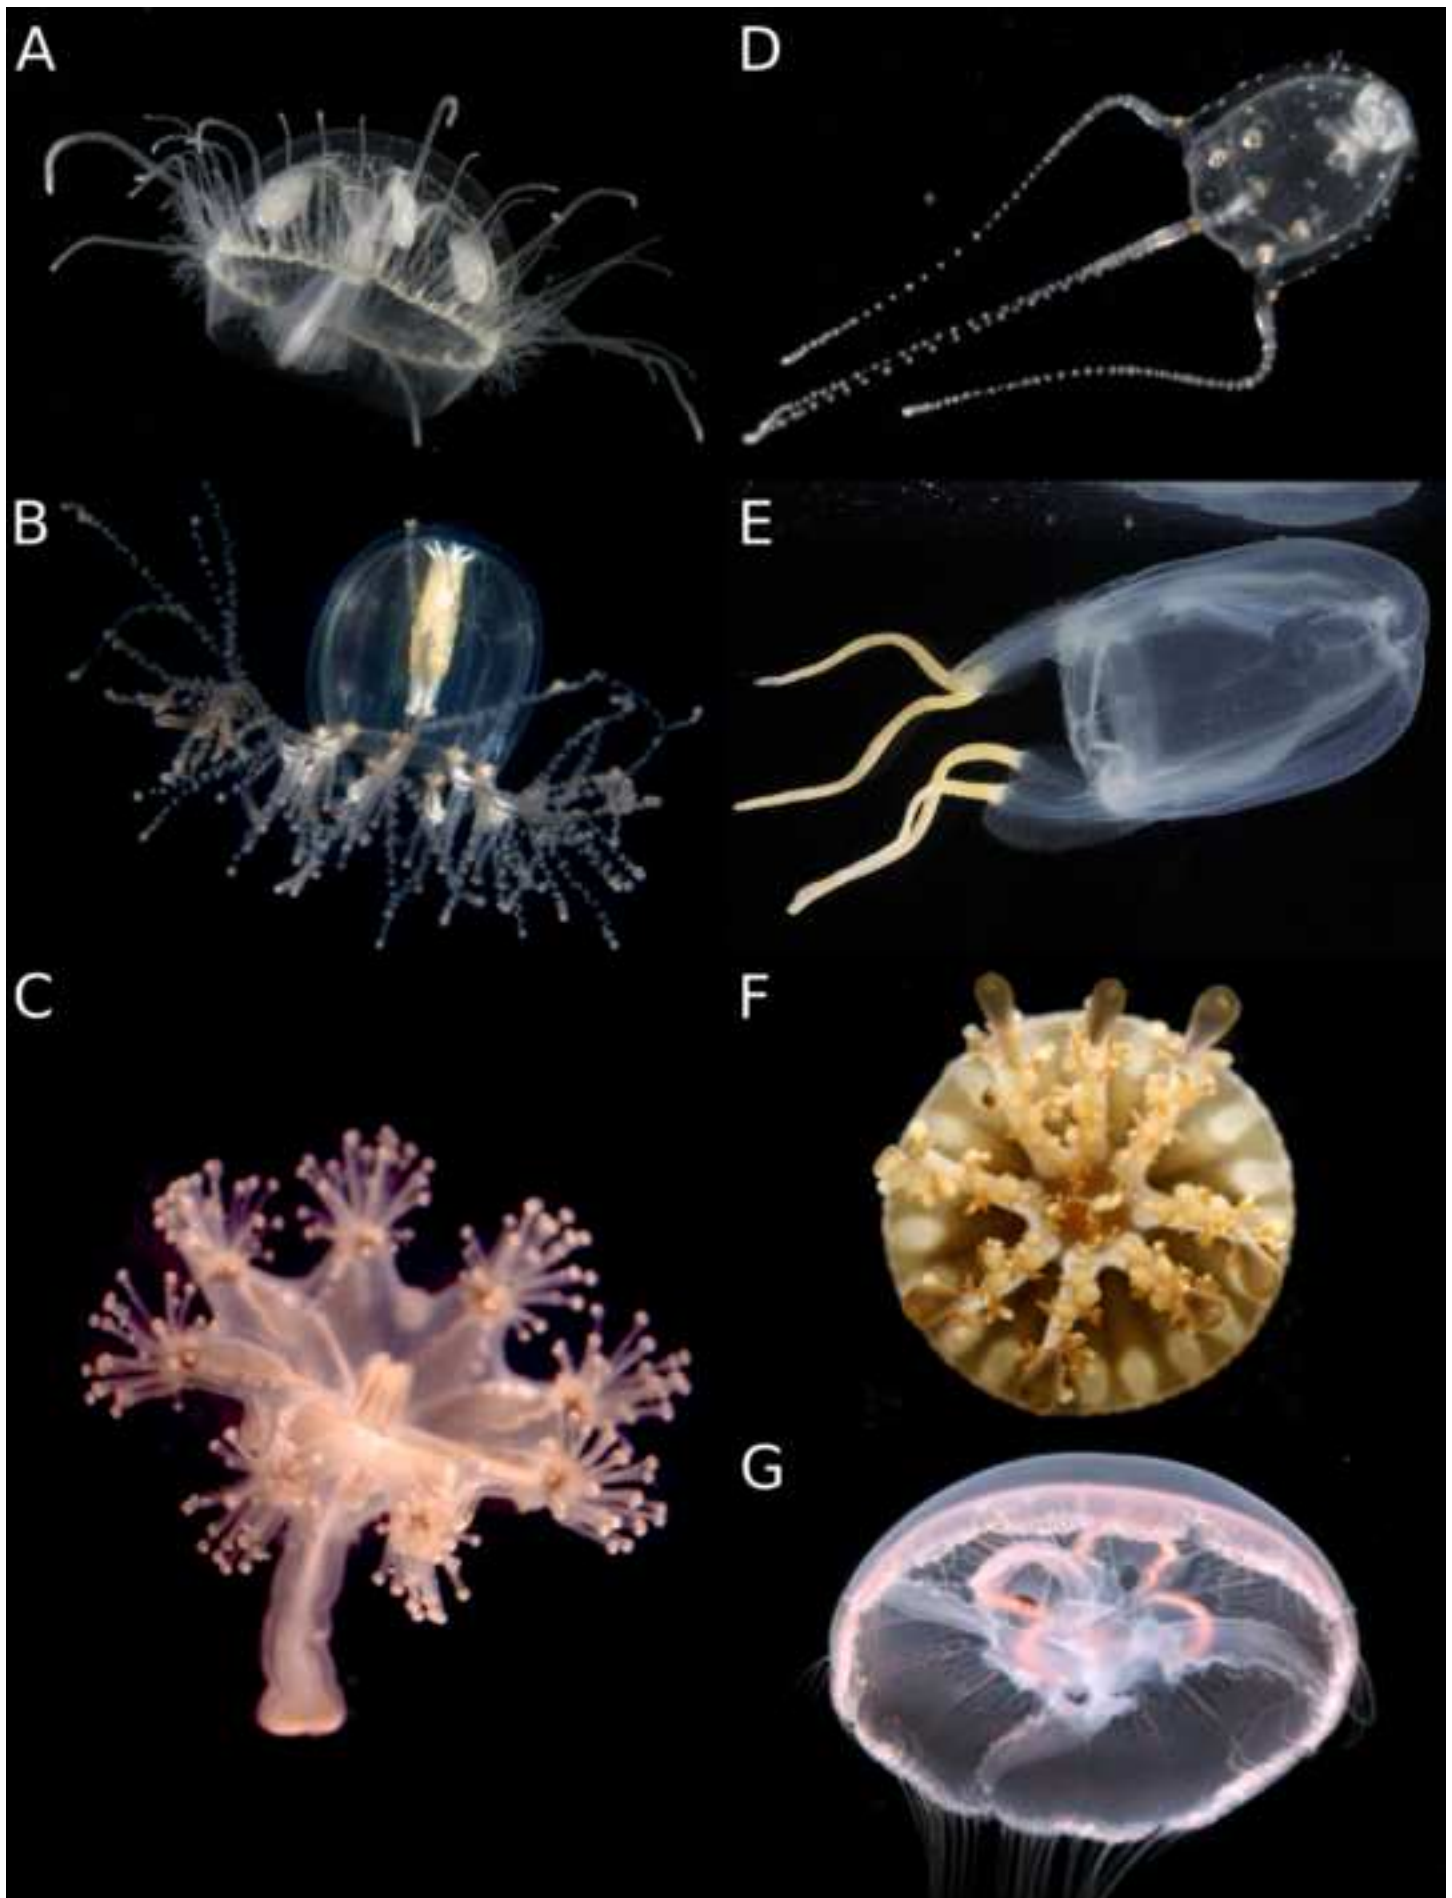



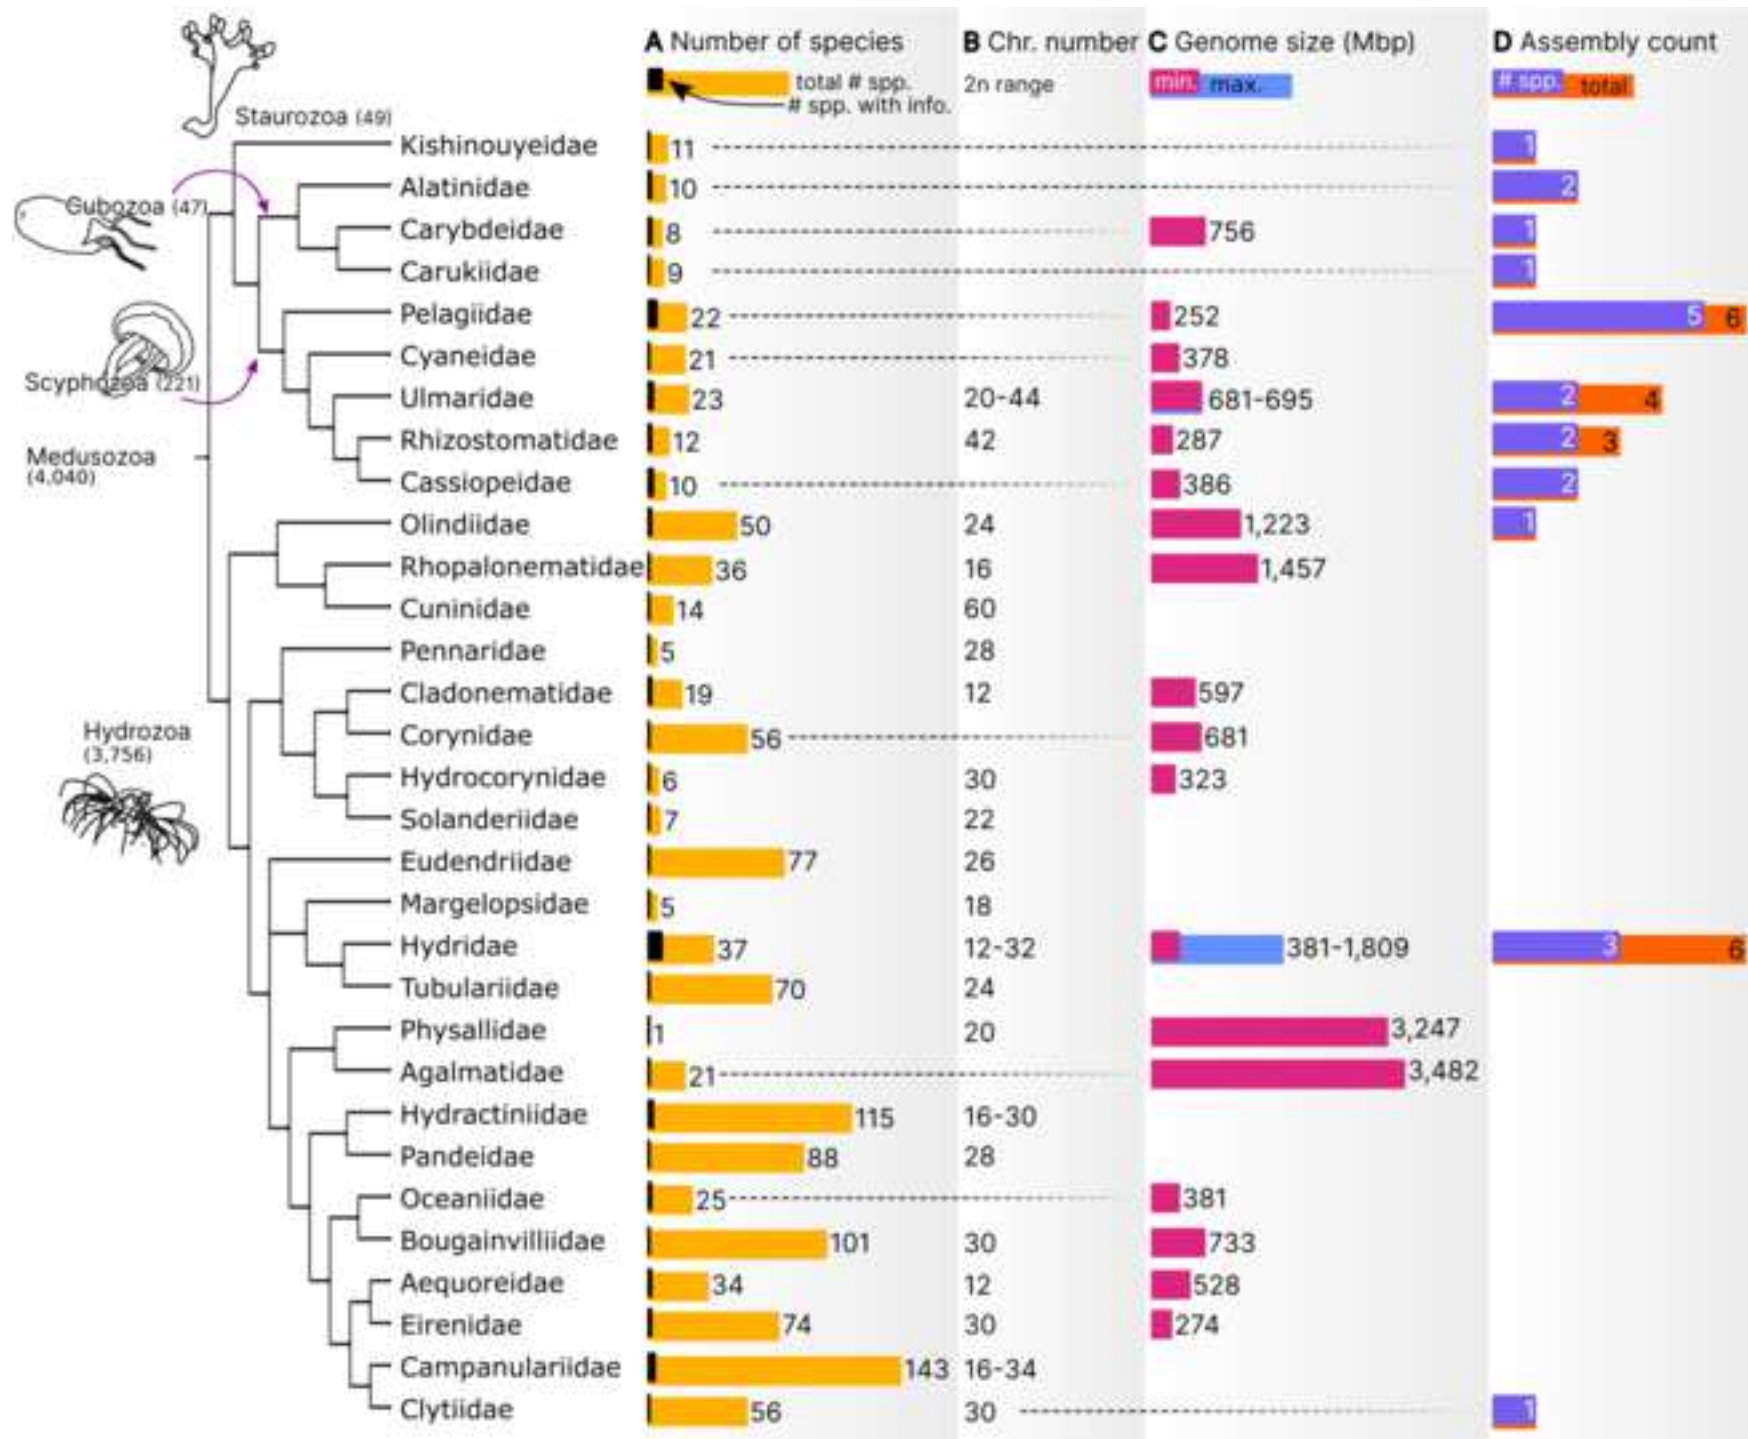

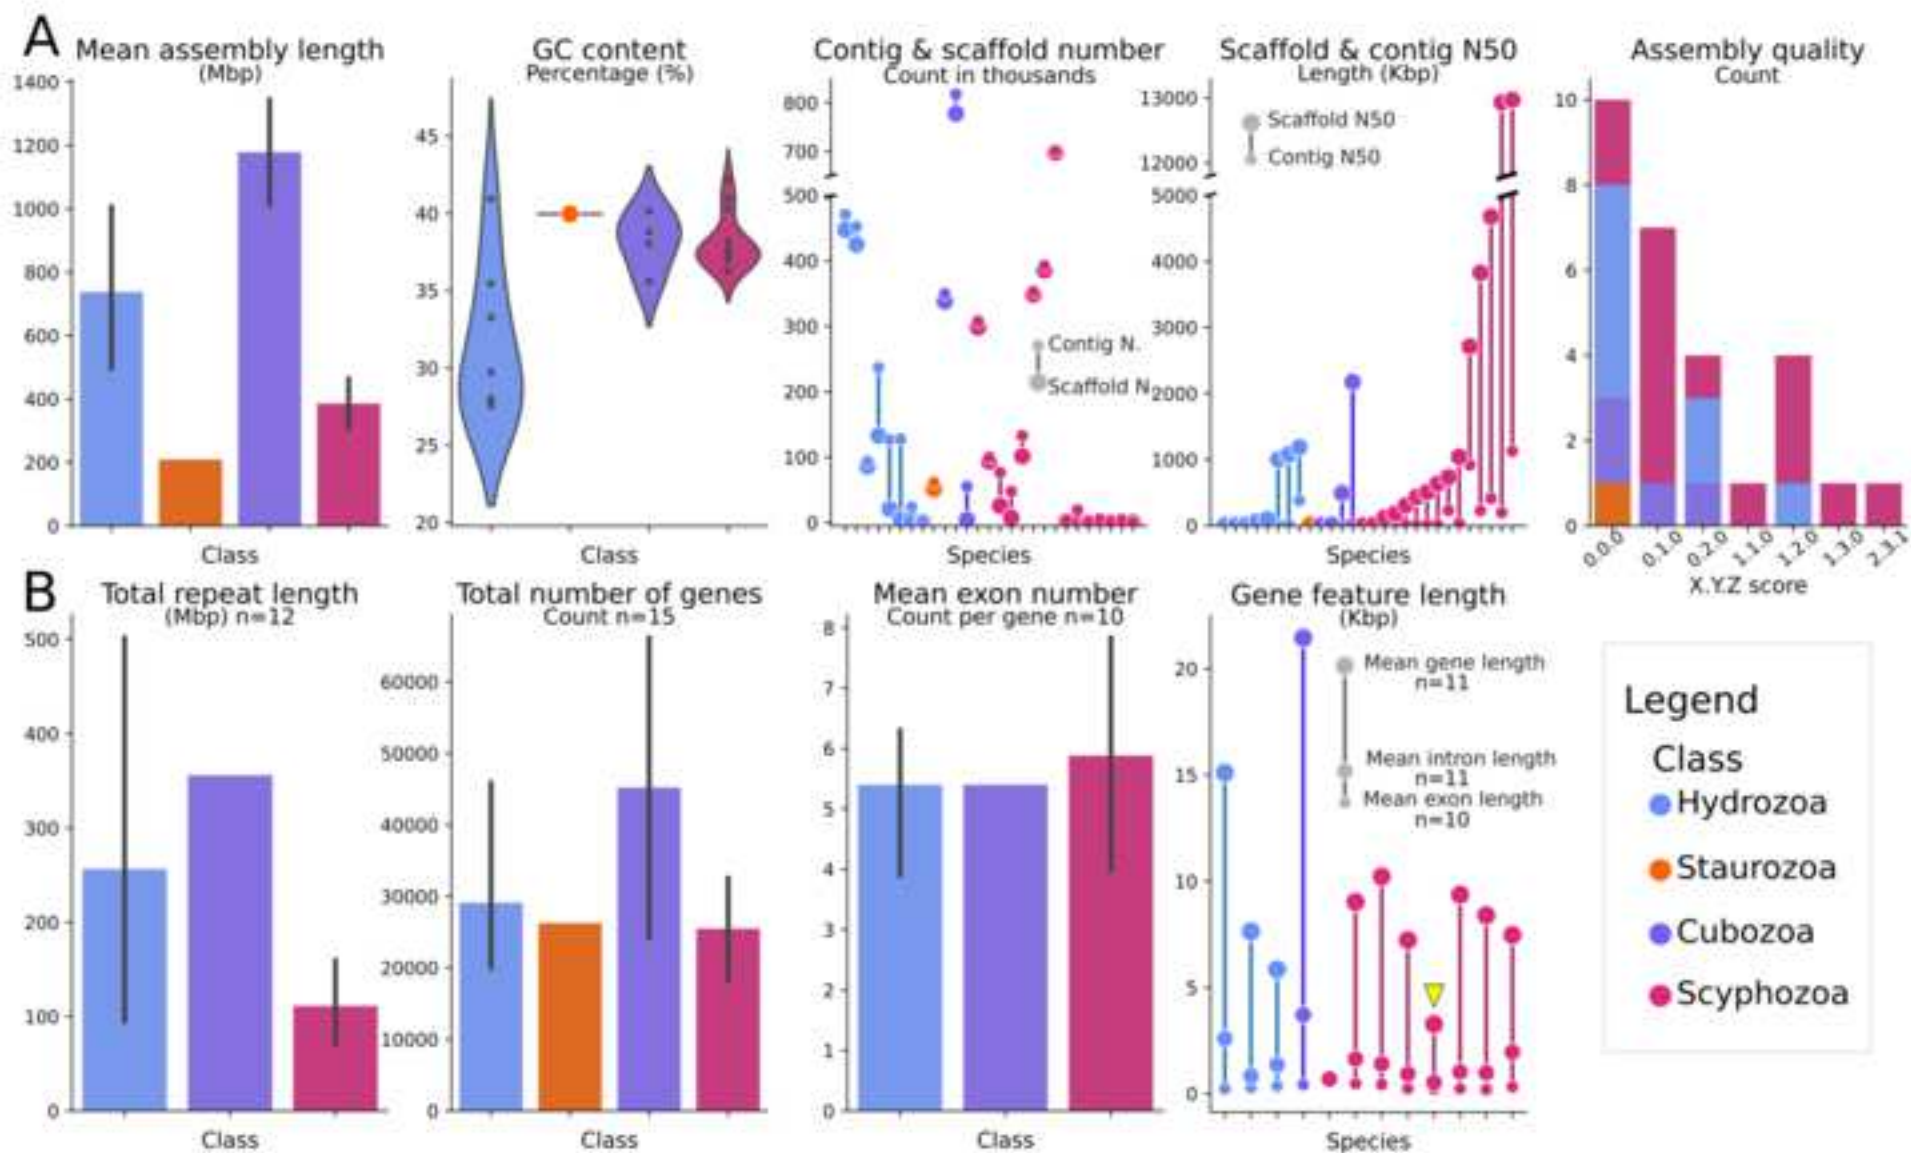

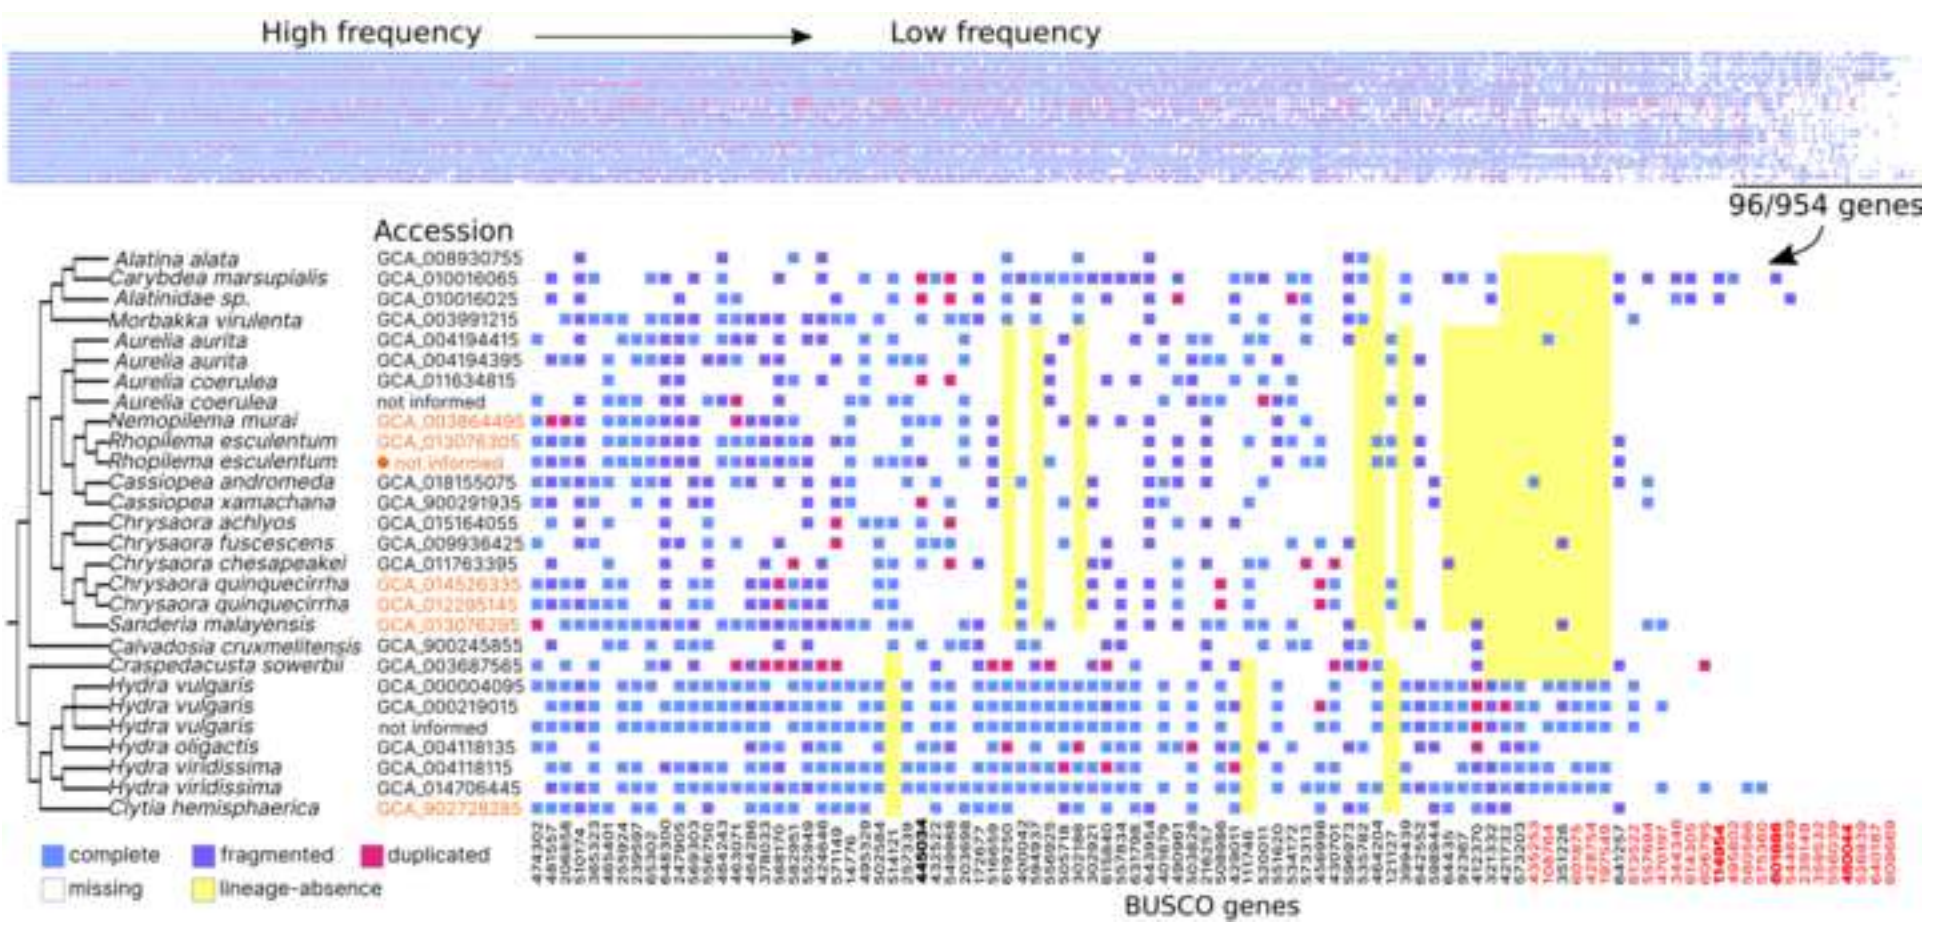



Click here to access/download

**Supplementary Material**

Supplementary\_file\_S1\_Dataset\_1\_genome\_report\_sheet.xlsx

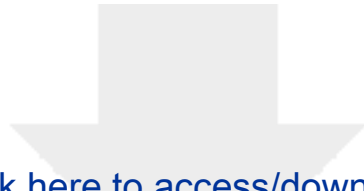

[Click here to access/download](#)

**Supplementary Material**

[Supplementary\\_file\\_S2\\_command\\_line.sh](#)

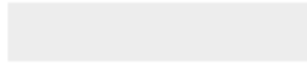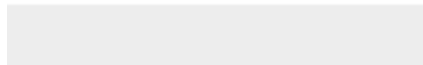

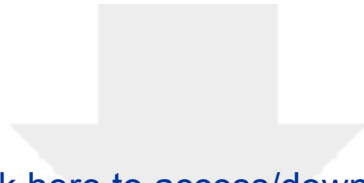

[Click here to access/download](#)

**Supplementary Material**

[Supplementary\\_file\\_S3\\_Codes\\_for\\_graphs.py](#)

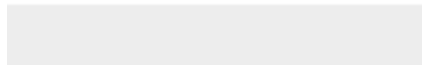



Click here to access/download

**Supplementary Material**

Supplementary\_file\_S4\_Table\_S1\_Chromosome\_GenomeSize.xls

X





Click here to access/download  
**Supplementary Material**  
Supplementary\_file\_S5\_TablesS2-  
8\_Figures\_Information.xlsx





Click here to access/download

**Supplementary Material**

Supplementary\_file\_S6\_Figure\_S1\_EukaryotaBUSCO.p  
ng

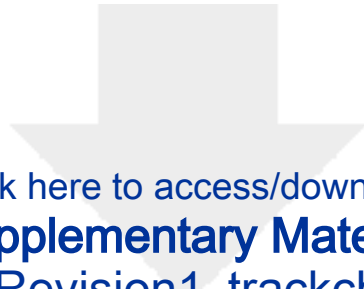

Click here to access/download

**Supplementary Material**

Main\_Text\_Revision1\_trackchanges.docx



## Editor

**"Your manuscript "The state of Medusozoa genomics: past evidence and future challenges" (Review Article; GIGA-D-21-00404) has been assessed by three reviewers. Based on these reports, I am pleased to inform you that it is potentially acceptable for publication in GigaScience, once you have carried out some essential revisions suggested by our reviewers. Their reports are below. I'd like to highlight three points:"**

We are very appreciative of the excellent suggestions from the reviewers and editor. We have done our best to address each point and we feel that the manuscript has been greatly improved as a result of the review process. Thank you for the time dedicated to our manuscript. We provide a point-by-point answer to each suggestion. We also provide a new main text and a copy of the original text with all the changes kept as tracks. Line numbers in this letter are referenced to the new main text file in the submission PDF. Original comments made by the editor and the reviewers are indicated in bold or between quotation marks. We also provide a formatted copy of the response to the reviewers as a separate file at the end of the submission PDF.

**"1. Two of the reviewers mention that the "recommendations" would benefit if it would make clearer if there are any Medusozoa-specific recommendations (in addition to advice that is generally applicable to all animal genome projects)"**

We have added the following to address this point generally on line 422:

The following are suggestions to enhance genome projects and outcomes, and to promote open and collaborative research. These suggestions can be broadly applied to any genome project and are in line with those proposed by many initiatives and consortia (e.g. [33,100,101]). Nevertheless, it is worth reinforcing and discussing them in the context of this review since genome projects are more and more often being initiated in research laboratories that have historically been more focused on other aspects of medusozoan biology and may not be as familiar with these general practices:

We have added the following to point #3 that refers to where to deposit data on lines 446:

A Medusozoa-centric database with long-term maintenance is still lacking for the community (e.g. Mollusca clade [104]); but many open repositories can serve this purpose with low or no costs considering the size of the aforementioned outputs. There are open topic-centric repositories (e.g. Dfam [105] for repetitive DNA), general repositories (e.g. FigShare, Zenodo; or even NCBI for annotation tracks) as well as personal or institutional ones. Many of the reviewed genomic projects already made use of these repositories but failed to deposit some of the outputs. A solution for this inconvenience is to update submissions or create novel ones (e.g. submit annotations to NCBI or ENA) to deposit the missing outputs.

**"2. Reviewer 1 recommends to make your code public, and I strongly support this, as it is also in line with our journal guidelines. You can also host code and supporting data in our repository GigaDB - our data curators will be happy to help. Please attach an open (OSI-compliant) licence to any scripts/code. (<https://opensource.org/licenses>)"**

All the command lines used in this work were originally specified in the Supplementary File S7 of the original submission (Supplementary File S2 in the current version) but it was not properly indicated in the material and methods section. We corrected this issue by adding the following sentence on lines 122:

The command line used for retrieving genetic information and metadata, for statistics calculation and the code used for graph generation are available at Supplementary file S2 and S3.

We have also added the scripts used for constructing graphs in Supplementary file S3 (as suggested by reviewer 1). All the software used in this work is open and was properly referenced.

We deposited all supplementary files in Figshare and GigaDB and included a statement of open license to scripts on lines 518:

#### **Data availability**

All collected information, outputs and scripts supporting new results are available in the supplementary files S1-S9 in Figshare [114] and in GigaDB [115].

**"3. Although not mentioned by the reviewers, I feel your manuscript would be more interesting for readers from outside the medusozoa community if you explained in a bit more detail the actual biological questions that have been addressed with these genomes; such as toxins, metazoan evolution / body plan evolution, Hox genes, immunity, etc.. These topics are mentioned in the introduction, but I feel they could be picked up again in a bit more detail in the discussion, to illustrate the biological insights gained from the genome projects."**

We have added two paragraphs that highlight the insight genome projects bring understanding medusozoa biology.

Starting on line 301:

The complex nature of Medusozoa venom has been investigated by a number of transcriptomic, proteomic and genomic studies (reviewed in [26]). Several putative toxin genes and domains have been identified, covering a significant part of the wide range of known toxins [20,22,59,73]. In Scyphozoa, toxin-like genes were often recovered as multicopy sets [20,59]. Moreover, in *R. esculentum* toxin-like genes were also tandemly arranged and several of them were located nearby in chromosome 7, suggesting that the observed organization might influence toxin co-expression[59]. Minicollagens, which are major components of nematocysts, also had a clustered organization and a pattern of co-expression in *Aurelia* [20]. These examples add to

various clustered genes described in Cubozoa, Hydrozoa and Anthozoa, and would indicate that gene clustering and operon-like expression of toxin genes is widespread in Cnidaria ([20] and references therein).

and starting on line 329:

The complex life cycle of Medusozoa has resulted from the combination of both ancestral and novel features. *Aurelia*, *Morbakka virulenta* and *Clytia hemisphaerica* have significantly different patterns of gene expression across stages and during transitions [19–21]. Differentially expressed genes include many conserved ancestral families of transcription factors [19–21]; there is also a considerable amount of the putative lineage-restricted genes that show differential expression in the adult stages [20,21]. A few of these “novel” medusozoan genes have been described, such as novel myosin-tail proteins that are absent from Anthozoa and represent markers of the medusae striated muscles [20]. It was suggested that the evolution of the Medusozoa complex life cycle would therefore have involved the rewiring of regulatory pathways of ancestral genes and the contribution of new ones [19–21]. As such, the body plan and life cycle simplifications observed in *Clytia* and *Hydra*, respectively, would be the result of loss of transcription factors involved in their development [21]. Finally, the significance of many of the putative Medusozoa and species-specific genes remain to be elucidated.

**"4. For a review article, please also feel free to add illustrations/photos of relevant medusozoa species, if you wish (but please check with any copyright holder, if applicable - images will be published under an open cc-by licence)."**

We added a new figure (Figure 1) with photographs of example species of each Medusozoa class. Some photographs (Figure 1 A, B, D, E) were recovered from an online open database called Cifonauta, available under open cc-by license, and it was properly cited. The remaining photographs were provided by Marta Chiodin (Figure 1C), Joseph Ryan (co-author; Figure 1 F, G), with permission to publish under CC-BY license. As a result of the addition of a new Figure 1, all figures were renumbered accordingly.

**"Reviewer 1"**

**"In this paper, Santander et al. review the field of medusozoan genomics, which has burgeoned in the last three or so years. Overall, I found this a clear, interesting read. The manuscript is well-written, the figures are valuable, and the authors nicely describe the history of the research as well as the state of the field. The findings are not monumental, but it is a worthwhile exercise to survey the rapidly-increasing dataset of genomes in a systematic way, and this review will be a useful start for further work in medusozoan comparative genomics. I rarely suggest a paper should be accepted during the first round of review, and I usually try to provide more constructive feedback than I do here, but I really don't have much too much to quibble with. A couple thoughts are provided below:**

**1. The set of suggestions for future work near the end of the document are fine, but they could apply broadly to any genome project. I encourage the authors to consider whether there are specific problems related to medusozoan evolution that are hampered by inconsistencies between studies, and discuss how their recommendations (or additional ones) could help resolve them."**

This comment also addresses reviewer #3's first point as well. We have added the following, which acknowledges that some of our recommendations are general to all genome projects and provides justification for why it is important to include these in this review on line 422:

The following are suggestions to enhance genome projects and outcomes, and to promote open and collaborative research. These suggestions can be broadly applied to any genome project and are in line with those proposed by many initiatives and consortia (e.g. [33,100,101]). Nevertheless, it is worth reinforcing and discussing them in the context of this review since genome projects are more and more often being initiated in research laboratories that have historically been more focused on other aspects of medusozoan biology and may not be as familiar with these general practices:

In the recommendation regarding depositing results in public databases we discussed its importance and how metadata can be improved when datasets were already made public on line 431:

Frequently, data and metadata that are described in the original articles or deposited in repositories are not submitted to public databases. Tracking information from multiple sources is time consuming and prone to error. Databases and repositories enable the improvement of metadata after the initial releases, by the addition of new or corrected information (e.g. publication information) from the authors. We believe that this kind of data curation would improve the state of Medusozoa genomics not only by enabling downstream analysis after the publication, but also enabling the detection of methodological options (e.g. tissue selection; sequencing technology) that would improve the quality of the results.

In the section about depositing intermediate outputs, we have added information on the state of relevant taxon-specific databases on line 446:

Medusozoa-centric database with long-term maintenance is still lacking for the community (e.g. Mollusca clade [104]); but many open repositories can serve this purpose with low or no costs considering the size of the aforementioned outputs.

We added a paragraph discussing potential problems and benefits related to proper method description on line 460.

The latter suggestions (3-6) are mainly related to providing detailed methodologies of bioinformatic analyses. First, proper method and results descriptions can help to recover metadata and criteria usually not available in large sequence repositories. Second, comparative analyses depend upon standardization at different levels and significant sample sizes. The inclusion of species in downstream analyses is limited by

data availability and proper description of previous analyses, custom software and results.

We added a recommendation about engaging in community-wide discussions, and highlighted potential venues that would be appropriate for discussing medusozoan genomics standards starting on line 466:

7. Engage in community-driven conversations about standards, guidelines and species priorities. There are a number of taxon-specific meetings that would be appropriate venues to engage in these conversations including the International Conference on Coelenterate Biology (~decennial; [106]), the International Jellyfish Blooms Symposium (~triennial), Cnidofest (~biennial; [107]), Tutzing workshop (~biennial; [108]), and Cnidofest zoom seminar series. In addition, satellite meetings at larger annual meetings (e.g. the Society for Integrative and Comparative Biology (SICB) or the Global Invertebrate Genomics Alliance (GIGA [101])) could provide appropriate venues to facilitate discussions on how the community can best move forward as more and more genomic data come online.

We close the section with a paragraph that explains how adhering to standards will benefit the medusozoan community on line 475:

The adoption of best practices in the Medusozoa genomics community will pave the way for major breakthroughs regarding understanding the genomic basis for several evolutionary innovations that arose within and in the stem lineage of Medusozoa. Similar advances were achieved with extensive taxon sampling at broader scales, where 25 novel core gene groups enriched in regulatory functions might be underlying the emergence of animals [109,110]. Medusozoa innovations have puzzled the community for decades [5,7,11,111] and include the origin of the medusa, the loss of polyp structures, the establishment of symbiosis, the blooming potential, and the evolution of an extremely potent venom. A deeper understanding of the genomic events driving these innovations will require accurate identifications of a number of key genomic features including (but not limited to) single copy orthologs, gene losses, lineage-specific genes, gene family expansions and non-coding regulatory sequences.

Related to this last point, we also suggest to read the added sentences after reviewer #3 comment on line 314:

Recent evidence proved that the detection of lineage-specific genes, and other analyses relying on accurate annotation and orthology prediction, can be significantly biased by methodological artifacts [79–83]; several problems have been identified, such as low taxon sampling, heterogeneous gene predictions, and failure of detecting distant homology and fast-evolving orthologues. These considerations are highly relevant in Medusozoa, as comparisons are often made, by necessity, with distantly related species (e.g. Anthozoa has been estimated to have diverged from Medusozoa around 800 million years ago [84]).

**"2. I would encourage the authors to practice what they preach in terms of transparency, and make the code they used in their methods public (e.g.**

**statswrapper.sh, AGAT, BUSCO, ETE Toolkit, Matplotlib, Seaborn). The code does not need to be executable, but a supplemental text and/or repository with as much of the starting data and commands executed as possible would make it easier for others to replicate this work and apply it to future comparative genomics projects."**

All the command line used in this work was originally specified in the Supplementary S7 of the original submission but we did not properly indicate this in the material and methods section. We corrected this issue by adding a sentence in the corresponding section as indicated below (note: this required re-numbering the supplementary files so Supplementary file S7 is now S2). We also included the scripts used for constructing graphs. All the packages and softwares used in the command line and in the custom scripts (statswrapper.sh, AGAT, BUSCO, ETE Toolkit, Matplotlib, Seaborn) are open. We have added the following on line 122:

The command line used for retrieving genetic information and metadata, for statistics calculation and the code used for graph generation are available at Supplementary file S2 and S3.

**"3. Line 236: "...ploidy level, heterochromatin contente." This should be changed to "...ploidy level, and heterochromatin content."**

This error was corrected.

**"4. Line 253-254: "...evolution of genome size is a long-standing question that is included in the so-called C-value Enigma [40]." The authors provide a citation, but I think this sentence would be stronger with a brief explanation of what the C-value Enigma is. Medusozoans are a great example of this "enigma", so it's worth reinforcing."**

We have added the following to clarify the C-value enigma on line 274:

... "C-value Enigma" [41]. This name stems from the difficulty elucidating the evolutionary forces (e.g. drift and natural selection) that have given rise and serve to maintain variations in genome size, the mechanisms of genome size change, and the consequences of these variations at an organismal level [41]. Several conflicting hypotheses have been postulated to explain this puzzle with most having experimental support in some but not all lineages (reviewed in [68]).

## **Reviewer 2**

**"This manuscript offers a reanalysis of all available nuclear genomic data published on medusozoans. It represents a well thought, and timely review of the available data, systematically comparing genomic features (repeated elements, intro/exon/gene size and numbers, chromosome numbers...) and genomic assemblies (available data, assembly quality and size...) in the different medusozoan classes. It largely confirms**



**the results obtained from analysis of single species. It also provides useful guidelines for future standardization of genomic projects focused on medusozoans."**

**Minor comments and suggested corrections:**

**1. Line 118: How was "compiled all genomic and HTS metadata reference in this review", manually? If not, please provide the scripts used for this task."**

The information was collected by a combination of automatic and manual retrieval, as it was superficially mentioned in the first paragraph of the Material and Methods section. We added a few sentences to clarify this point as follows below. All of the command lines used for these analyses were originally specified in the Supplementary S7 of the original submission but this was not properly indicated in the material and methods section. We corrected this issue by adding a sentence in the corresponding section as indicated below (note: this required re-numbering the supplementary files so Supplementary file S7 is now S2).

First, we clarified the automatic and manual retrieval on line 91:

Our main source of genomic information and metadata was NCBI Genome (Assembly, Genomes, Nucleotide, Taxonomy and SRA; [27]). We retrieved data automatically using entrez-direct v.13.9 and NCBI datasets v. 12.12. For information not present in NCBI, we checked published articles for proper information collection, as well as personal repositories mentioned in the associated articles.

We clarified that the merging of manually and automatically retrieved information was merged/compiled manually, and specified the supplementary material where scripts and command lines were deposited on line 119:

We manually compiled all genomic information and HTS metadata referenced in this review using a report model based on previous works and public databases such as NCBI (Supplementary file S1; [29,41,42]). The command line used for retrieving genetic information and metadata, for statistics calculation and the code used for graph generation are available at Supplementary file S2 and S3.

**"2. Line 236: correct contente"**

This error was corrected.

**"3. Line 326: The sentence starting with "Moreover, even..." is unclear. Please clarify or delete."**

To clarify this point we deleted the original sentence and added the following on line 403:

In addition, submission to the large databases like SRA and GenBank can lead to the automatic detection of specific issues such as contamination or annotation errors that might otherwise not be detected.

**"4. Line 389: correct "proyectos""**

This error was corrected.

**"5. Figure 1: it would useful to indicate in this figure genome sizes calculated from genomic assemblies, in addition to genome sizes calculated from flow cytometry and feulgen densitometry estimations; either as a new column or using another color in C"**

We prefer to maintain the original version of the figure. The following reasons were considered for not adding "assembly length" in figure 1 (now renumbered as Figure 2):

- Assembly length would not be a robust estimation of genome size because different causes can lead to biased results, especially for short reads projects. High heterozygosity and incomplete collapsing of haplotypes can lead to genome size overestimation. Sequencing bias, as well as repetitive DNA misassembly, can lead to underestimations of genome size (see <https://doi.org/10.1371/journal.pone.0062856>; [10.1111/1755-0998.12933](https://doi.org/10.1111/1755-0998.12933); <https://doi.org/10.1101/2021.04.09.438957>; for further details)
- Adding this information in Figure 1 (now renumbered as Figure 2) could hinder visualization as already many variables are being simultaneously plotted.
- Distribution of assembly length was specified in Figure 2a (now renumbered as Figure 3a).

**"6. SM\_Table2: Supplementary Material S2 - Table S1 - please correct in the title "condidering"."**

This error was corrected.

### **Reviewer 3**

**"Santander et al. review the state of genome assemblies and cytogenetics of Medusozoa. This review captures the progression of the sequencing efforts in the past decade and how the field is moving with new technological advances. From their assessment of the literature and unpublished data, they found that a weakness in their community is a general lack of standardization in analysis and limited availability of intermediate assembly components, such as the repeat libraries, and associated metadata. In the end they provide recommendations for standards to be applied to ongoing and future genomic projects.**

**1. I felt that these recommendations fell short of extending beyond basic requirements of publishing genomes today. While these recommendations are in line with recommendations of other genomic consortia (Vertebrate Genomes Project [Rhieet al. 2021, Nature], Sanger/Moore Aquatic Symbiosis Genomics, etc.) and most publishers including GigaScience (deposit data, reproducible methods, code availability statements, etc), they are quite general. I was left wondering if this was a commentary on the whole field of genomics. "**

Reviewer #1 had a very similar comment. We have added the following, which acknowledges that some of our recommendations are general to all genome projects and provides justification for why it is important to include these in this review on lines 422:

The following are suggestions to enhance genome projects and outcomes, and to promote open and collaborative research. These suggestions can be broadly applied to any genome project and are in line with those proposed by many initiatives and consortia (e.g. [33,100,101]). Nevertheless, it is worth reinforcing and discussing them in the context of this review since genome projects are more and more often being initiated in research laboratories that have historically been more focused on other aspects of medusozoan biology and may not be as familiar with these general practices:

**"2. To that end, are there specific recommendations regarding medusozoans that would enhance data usage community wide that could be stated here? "**

As a response to point, which was also raised by reviewer #1 we added several sentences and paragraphs. Specifically, the manuscript now includes a discussion of how curational steps on database metadata could enhance data usage. It also includes a discussion about the lack of taxon-specific databases appropriate for Medusozoa, which may inspire such an effort in the near future. In addition, our recommendation that conversations regarding the state of medusozoan genomics take place at taxon-specific meetings should lead to enhanced data usage.

On line 431:

Frequently, data and metadata that are described in the original articles or deposited in repositories are not submitted to public databases. Tracking information from multiple sources is time consuming and prone to error. Databases and repositories enable the improvement of metadata after the initial releases, by the addition of new or corrected information (e.g. publication information) from the authors. We believe that this kind of data curation would improve the state of Medusozoa genomics not only by enabling downstream analysis after the publication, but also enabling the detection of methodological options (e.g. tissue selection; sequencing technology) that would improve the quality of the results.

On line 446:

A Medusozoa-centric database with long-term maintenance is still lacking for the community (e.g. Mollusca clade [94]); but many open repositories can serve this purpose with low or no costs considering the size of the aforementioned outputs.

On line 466:

7. Engage in community-driven conversations about standards, guidelines and species priorities. There are a number of taxon-specific meetings that would be appropriate venues to engage in these conversations including the International Conference on Coelenterate Biology (~decennial; [106]), the International Jellyfish Blooms Symposium (~triennial), Cnidofest (~biennial; [107]), Tutzing workshop (~biennial; [108]), and Cnidofest zoom seminar series. In addition, satellite meetings at larger annual meetings (e.g. the Society for Integrative and Comparative Biology (SICB) or

the Global Invertebrate Genomics Alliance (GIGA [101])) could provide appropriate venues to facilitate discussions on how the community can best move forward as more and more genomic data come online.

We also provided a link in the data availability statement to the online version of the Supplementary file 1 in Figshare. This table will be maintained and can be modified/corrected if authors from the original papers contact us. On line 522:

A copy of table S1 will be available upon publication [114] and can be updated upon the original author's request.

**"3. Are there established assembly pipelines (i.e. tools that provide the highest quality assemblies from various species) or types of sequencing effort (i.e. long read + HiC maps, transcriptome-informed gene annotation) that should be endorsed as part of your assessment?"**

A rigorous assessment of this issue was not possible because Medusozoa genomic datasets are quite heterogeneous (time-scales, technologies, objectives, methods and output quality; all with a small sampling). However, it is a highly relevant topic, and we opted to mention general trends in the main text with a proper citation to more specific bibliography on methods. We added the following paragraph on line 237:

Differences in sequencing strategy and platforms are expected to be linked with assembly quality, both in terms of continuity and completeness. For example, hybrid sequencing plus optical maps and combined evidence-based annotation should generate better results than a short-read sequencing and single-evidence annotation [61,62]. Although this general trend was observed in this review, with most Illumina-only datasets showing lower BGP-metric (Figure 3) and lower completeness (Figure 4), it is not a granted condition. Some punctual cases can exemplify biological and methodological issues that impose limitations to genome sequencing and assembly: e.g. the difficulty in obtaining chromosome-scale assemblies despite small genome sizes and combined sequencing strategies (Hi-C + short reads+ long reads) [63,64] or the difficulty in extracting high-molecular-weight DNA [20]. Because of the heterogeneity of Medusozoa genomic projects in terms of time periods, objectives, methods and resources, a proper quantitative analysis of the relationship between methods and outcome quality would not be feasible, and we prefer to refer to articles specialized in assessing methods (e.g. [61,62]).

**"4. Are there specific taxonomic gaps that should be prioritized (starting Line 238)?"**

There are taxonomic gaps in Medusozoa genomics that were mentioned in the "**Genomic projects: whos and hows of Medusozoa**" section. But we believe criteria for priority should come from community discussions as was carried on by other projects. To remark the importance of filling taxonomic gaps, we added the following sentences on line 466:

7. Engage in community-driven conversations about standards, guidelines and species priorities.

And on line 501:

The distribution of genetic and genomic information presented significant taxonomic gaps in Medusozoa. It is a reasonable scenario since genomic sequencing data is accumulating in many medusozoan lineages. Even so, some of the most species-rich clades with a diverse array of phenotypic and ecological traits have not yet had their genomes sequenced (e.g. Scyphozoa: Coronamedusae, Hydrozoa: Macrocolonia). These, and other, heretofore genomically underexplored lineages provide golden opportunities from which to make major contributions to understanding the evolution of Medusozoa genomes and would be a wonderful contribution to the rest of the Medusozoa research community. Defining candidate species for sequencing can avoid unnecessary doubled efforts. Different international projects recognized this situation and proposed a set of criteria for prioritizing species at other scales, such as the GIGA ([101]).

**"5. The majority of the resources you identified only have short-read Illumina data which inevitably means that chromosome-scale assemblies are not possible yet. However, these assemblies are sufficient for gene model comparisons across species (starting on Line 187). Is there a way to standardize gene prediction for cases where short reads may be all that is available?**

**Re-analysis of gene predictions with different tools may lead to varying estimates and can lead to erroneous orthology assignments (see <https://doi.org/10.1111/jpy.12947>, <https://doi.org/10.1371/journal.pbio.3000862>, and <https://www.biorxiv.org/content/10.1101/2022.01.13.476251v1>). Re-analysis of Rhopilema gene content using different tools increases gene predictions closer to the median gene count you've found."**

Based on this commentary, we have added several sentences to clarify the problem of comparative analysis based on heterogeneous annotations. This point was explored in the section "The state of Medusozoa genomics: inner and derived knowledge" in relation to articles' conclusions about lineage-specific genes and increases/decreases in gene content. Moreover, this point was also recapitulated at the final part of the recommendations, reinforcing the problem of comparative analysis.

We made the following additions on line 314:

Recent evidence proved that the detection of lineage-specific genes, and other analyses relying on accurate annotation and orthology prediction, can be significantly biased by methodological artifacts [79–83]; several problems have been identified, such as low taxon sampling, heterogeneous gene predictions, and failure of detecting distant homology and fast-evolving orthologues. These considerations are highly relevant in Medusozoa, as comparisons are often made, by necessity, with distantly related species (e.g. Anthozoa has been estimated to have diverged from Medusozoa around 800 million years ago [84]).

On line 460:

The latter suggestions (3-6) are mainly related to providing detailed methodologies of bioinformatic analyses. First, proper method and results descriptions can help to recover metadata and criteria usually not available in large sequence repositories. Second, comparative analyses depend upon standardization at different levels and significant sample sizes. The inclusion of species in downstream analyses is limited by data availability and proper description of previous analyses, custom software and results.

and on line 475:

The adoption of best practices in the Medusozoa genomics community will pave the way for major breakthroughs regarding understanding the genomic basis for several evolutionary innovations that arose within and in the stem lineage of Medusozoa. Similar advances were achieved with extensive taxon sampling at broader scales, where 25 novel core gene groups enriched in regulatory functions might be underlying the emergence of animals [109,110]. Medusozoa innovations have puzzled the community for decades [5,7,11,111] and include the origin of the medusa, the loss of polyp structures, the establishment of symbiosis, the blooming potential, and the evolution of an extremely potent venom. A deeper understanding of the genomic events driving these innovations will require accurate identifications of a number of key genomic features including (but not limited to) single copy orthologs, gene losses, lineage-specific genes, gene family expansions and non-coding regulatory sequences.

In relation to the question: **"Is there a way to standardize gene prediction for cases where short reads may be all that is available?"**

We are not aware of any pipeline specifically designed to standardize gene prediction for short-read assemblies. One solution would be to re-annotate and annotate all genomes by the same methodology. Another solution would be to use existing annotations and improve them by comparative analysis or by targeting specific gene families of interest. These considerations were added to "Prospects on genomic data and general resources" but not as part of the final recommendations on line 390.

An alternative solution for comprehensive comparative analyses is to (re)annotate all genomes with the same pipeline, a task that is laborious and time consuming. Some programs were designed for achieving this task simultaneously in many related species (e.g. [89,90]). Another alternative is to use specific software developed to improve genome annotations by leveraging data from multiple species (e.g. [91,92]) or targeting specific gene families [93,94]. Finally, differences in annotation due to methodological artifacts can be accommodated in comparative analysis if considered as a variable in the statistical tests (e.g. comparing tRNA genes in high and low quality avian genomes [95]).

**"6. Regarding the recommendation for depositing intermediates into repositories (#3), is there one established for the community or are you referring to more general ones like Dryad, FigShare, Replibase, etc.? Providing an example genome project or two that shares these associated files might be helpful."**

We were referring to general repositories. We have clarified this point in the section titled: "Deposit output results that were fundamental in any of the steps of the analysis" on line 446:

A Medusozoa-centric database with long-term maintenance is still lacking for the community (e.g. Mollusca clade [104]); but many open repositories can serve this purpose with low or no costs considering the size of the aforementioned outputs. There are open topic-centric repositories (e.g. Dfam [105] for repetitive DNA), general repositories (e.g. FigShare, Zenodo; or even NCBI for annotation tracks) as well as personal or institutional ones. Many of the reviewed genomic projects already made use of these repositories but failed to deposit some of the outputs. A solution for this inconvenience is to update submissions or create novel ones (e.g. submit annotations to NCBI or ENA) to deposit the missing outputs.

**"7. There can be cost associated with hosting these resources. Do you see that as a barrier to researchers providing this sort of data?"**

Although repositories can be expensive, the intermediates we mentioned in recommendation #3 (gene and repetitive models and tracks) are frequently below 1gb. These file sizes can be easily accommodated by repositories with no cost at all. Therefore, we do not find cost to be a barrier for deposit. One possible barrier is that in general the submission process is cumbersome, something that might improve as new workflows are developed (as mentioned in the final conclusions of the manuscript).

**"8. A recommendation that is provided earlier in the paper is the call for lineage-specific single copy ortholog sets (Line 228). Should this be re-stated in the final recommendations as well?"**

The determination of a single copy ortholog set for Medusozoa would depend on the availability of gene annotations for several species, the completeness of these annotations, or availability of sufficient information enabling re-annotation of these genomes. We believe this might not be possible yet in Medusozoa, therefore this topic was restated together with suggestion #5 (starting on line 480).

**"Minor Comments:"**

**"9. Line 31-33: This sentence seems to be constructed of two thoughts but missing a connector between them."**

This error was corrected as follows in the abstract:

Modern genomic DNA sequencing in this group started in 2010 with the publishing of the *Hydra vulgaris* genome **"and"** has experienced an exponential increase in the past three years.

**"The following corrections were also done:"**

**"Line 98: ... assembly statistics using the statswrapper.sh script ..."**

**"Line 169: ... [55], and the ..."**

**"Line 315: Remove "of" between reusing and previously."**

**"Line 337: "reran" should be "rerun"."**

**"Line 389: Typo, "projects""**

**"10. Figures: The resolution of the figures provided made it difficult to review. Specifically Figure 3 was quite pixelated."**

The figures are concordant with the journal's requirements. The low quality of figures might be due to compression before the journal sent them to the reviewers. High quality versions of each version can be downloaded from the link available next to the figures in the pdf or svg files in Supplementary file S9. Leaving aside, Figure 2 and 3 (now re-numbered as Figure 3 and 4) were corrected to improve visualization; font size was increased and graph legend was repositioned.
